# Supplementary material for: N-Alkylimidazolium carboxylates as a new type of catanionic surface active ionic liquid: synthesis, thermotropic behavior and micellization in water
Source: Royal Society of Chemistry journal article supplement (doi:10.1039/d2sm00854h), 2022-01-01
Supplement: d2sm00854h1.pdf [file d2sm00854h1.pdf]

# Supporting Information

## ***N*-Alkylimidazolium carboxylates as a new type of Catanionic Surface Active Ionic Liquids: Synthesis, thermotropic behavior and micellization in water**

Sebastian B. Wachsmann<sup>+,a</sup>, Jessica Bauhof<sup>+,b</sup>, Aileen Rebecca Raab<sup>a</sup>, Anna Zens,<sup>a</sup> Thomas Sottmann,<sup>\*b</sup> and Sabine Laschat<sup>\*a</sup>

+ These authors contributed equally to the manuscript.

*a*     *Institut für Organische Chemie, Universität Stuttgart, Pfaffenwaldring 55, D-70569 Stuttgart, Germany*

*b*     *Institut für Physikalische Chemie, Universität Stuttgart, Pfaffenwaldring 55, D-70569 Stuttgart, Germany*

**Corresponding Author:** [sabine.laschat@oc.uni-stuttgart.de](mailto:sabine.laschat@oc.uni-stuttgart.de)

**Present Address:** Universität Stuttgart, Institut für Organische Chemie, Pfaffenwaldring 55, D-70569 Stuttgart, Germany.

### **Content**

|                                          |     |
|------------------------------------------|-----|
| 1. Materials and Equipment .....         | S2  |
| 2. Synthesis .....                       | S3  |
| 3. NMR spectra .....                     | S14 |
| 4. DSC and mesophase analysis.....       | S30 |
| 5. Polarization microscopy studies ..... | S37 |
| 6. Thermogravimetric analysis.....       | S39 |
| 7. Surface tension measurements .....    | S39 |
| 8. X-Ray data .....                      | S41 |
| 9. References.....                       | S50 |

## 1. Materials and Equipment

All chemicals were obtained from the supplier and used without further purification. The following instruments were used for the characterization of the compounds.  $^1\text{H}$  NMR spectra were recorded using *Bruker Avance 300*, *Avance 400* and *Avance 500* spectrometers at 300 MHz, 400 MHz and 500 MHz, respectively as well as  $^{13}\text{C}$  NMR spectra at 75 MHz, 100 MHz and 126 MHz. As a solvent, deuterated chloroform ( $\text{CDCl}_3$ ) was used with tetramethylsilane as a reference for the chemical shift  $\delta$  in ppm (parts per million). FT-IR spectra were recorded on a *Bruker Vektor 22* with a *MKII Golden Gate Single Reflection Diamond ATR*. Mass spectra (MS) as well as high resolution mass spectra (HRMS) were recorded by electrospray ionisation (ESI) with a *Bruker MicrOTOF-Q* spectrometer, and electron ionisation (EI) with a *Bruker Varian MAT 711* spectrometer. An *Elemental Analyzer Model 1106* from the company *Carlo Erba Strumentazione* was used for elemental analyses. Polarising optical microscopy measurements were realized with an *Olympus BX 50* polarising microscope combined with a *Linkam TP93* central controller. Differential scanning calorimetry was performed on a *DSC822e* from the company *Mettler Toledo*. Therefore, 40  $\mu\text{L}$  sealed aluminium crucibles with heating and cooling rates of 5 K/min were used. The phase transition temperatures of the extrapolated onset values were determined using the software *STARe 7.01* from *Mettler Toledo*. Thermo gravimetric analysis was performed with a *STA 449C Jupiter* from *Netzsch* with a constant heating rate of 10 K/min starting at 25 to 450  $^\circ\text{C}$ . X-ray diffraction was measured using *Bruker AXS Nanostar C* with a ceramic tube generator (1500 W) and cross-coupled Goebel mirrors that provide monochromatic  $\text{Cu K}_{\alpha 1}$  radiation (1.5405 Å). The samples were melted in a glass capillary from the company *Hilgenberg GmbH* (external diameter of 0.7 mm). Diffraction patterns were measured using a *Bruker HI-STAR* detector. For calibration, a diffraction pattern of silver behenate at room temperature was used before each measurement. Further analysis of measured values was performed with the software *SAXS (Version 4.1.51)* from the company *Bruker*. The obtained diffraction patterns were analyzed using the software *Datasqueeze (Version 2.2.8)* and *Origin*. The water content was determined via a Karl-Fischer Titrator *METTLER TOLEDO C10S* with a *DO308* oven. Therefore, 50 mg of the compound were heated within the device up to 120  $^\circ\text{C}$  and the evaporating water was titrated in a *CombiCoulomat fritless* solution. The surface tensions of the solutions of different concentrations were measured by a surface tensiometer (*Dataphysics DCAT 9*) equipped with a Wilhelmy plate. The solutions were prepared using ultrasound and an increased temperature in a volumetric flask. The solutions of the soapy ILCs were prepared in bidistilled water of the Institute for Physical Chemistry of the University of Stuttgart. For selected samples the surface

tension was measured as a function of concentration. The surface-tension measurements were started with the highest concentration solution, and the subsequent concentrated solutions were prepared by adding the amount of water which was used to clean and fill the sample vessel. The vessel was cleaned with 5 mL of the solution and 15 mL were used for the measurement. The measurements were performed at 25 °C. The measurements were terminated by the *DCATS* program when the standard deviation of the last 100 measured values was less than 0.02 mN/m.

## 2. Synthesis

### General procedure 1 (GP1): Synthesis of *N*-alkyl-*N*-methylimidazolium halides ([C<sub>n</sub>mim]<sup>+</sup>X<sup>−</sup>)

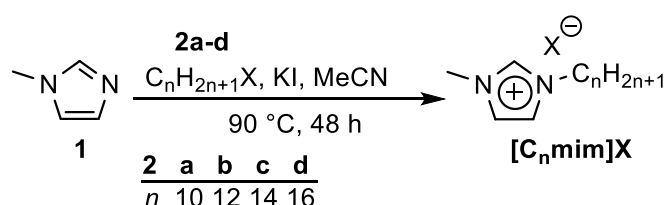

#### Scheme 1

*N*-Methylimidazole **1** (8.00 g, 97.4 mmol) and the corresponding alkyl halide **2a-d** (21.6 g, 97.4 mmol) were mixed together in MeCN (200 mL). Then KI (0.01 g, 60.2 μmol) was added as a catalyst. The mixture was stirred at 90 °C for 24 h. Subsequently the solvent was removed under reduced pressure and the alkylated product was purified via recrystallization from EtOAc (3 x 100 mL).

#### 1-Decyl-3-methylimidazolium chloride ([C<sub>10</sub>mim]<sup>+</sup>[Cl]<sup>−</sup>)

According to GP 1: *N*-Methylimidazole (8.00 g, 97.4 mmol), 1-bromodecane **2a** (21.6 g, 97.4 mol), KI (0.01 g, 60.2 μmol), MeCN (200 mL); reaction time:

72 h. Colorless liquid (95 %, 28.2 g, 93.0 mmol); <sup>1</sup>H NMR (300 MHz, CDCl<sub>3</sub>): δ = 0.82–0.93 (t, *J* = 7.1 Hz, 3H), 1.19–1.39 (m, 14H), 1.93 (dt, *J* = 7.1 Hz, 7.5 Hz, 2H), 4.15 (s, 3H), 4.34 (t, *J* = 7.5 Hz, 2H), 7.58 (t, *J* = 1.8 Hz, 1H), 7.77 (t, *J* = 1.8 Hz, 1H), 10.24 (s, 1H) ppm; <sup>13</sup>C NMR (75 MHz, CDCl<sub>3</sub>) δ 13.95 (1 × CH<sub>3</sub>), 22.47, 26.08, 28.83, 29.05, 29.20, 29.27, 30.19, 31.65 (8 × CH<sub>2</sub>), 36.58 (1 × NCH<sub>3</sub>), 49.94 (1 × NCH<sub>2</sub>), 122.06, 123.82 (2 × NCHC), 136.91 (1 × NCHN). The spectroscopic data were in accordance with ref<sup>1</sup>.

### 1-Dodecyl-3-methylimidazolium bromide ([C<sub>12</sub>mim]Br)

According to GP 1: *N*-Methylimidazole (8.00 g, 97.4 mmol), 1-bromododecane **2b** (29.1 g, 97.4 mol), KI (0.01 g, 60.2 μmol), MeCN (200 mL); reaction time: 48 h.

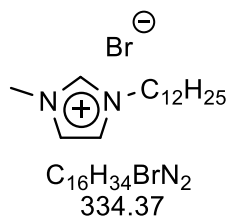

White solid (90 %, 29.00 g, 87.5 mmol); <sup>1</sup>H NMR (300 MHz, CDCl<sub>3</sub>): δ = 0.82–0.93 (t, *J* = 7.1 Hz, 3H), 1.24–1.37 (m, 25H), 1.92 (dt, *J* = 7.1 Hz, *J* = 7.4 Hz, 2H), 4.13 (s, 3H), 4.32 (t, *J* = 7.4 Hz, 2H), 7.41 (t, *J* = 1.8 Hz, 1H), 7.60 (t, *J* = 1.8 Hz, 1H), 10.48 (s, 1H) ppm; <sup>13</sup>C NMR (75 MHz, CDCl<sub>3</sub>) δ 14.07 (1 × CH<sub>3</sub>), 22.62, 26.23, 28.97, 29.27, 29.33, 29.45, 29.53, 30.29, 31.84 (10 × CH<sub>2</sub>), 36.58 (1 × NCH<sub>3</sub>), 50.06 (1 × NCH<sub>2</sub>), 121.70, 123.56 (2 × NCHC), 137.91 (1 × NCHN).

The spectroscopic data were in accordance with ref<sup>2</sup>.

### 1-Tetradecyl-3-methylimidazolium bromide ([C<sub>14</sub>mim]Br)

According to GP 1: *N*-Methylimidazole (6.00 g, 73.1 mmol), 1-bromotetradecane **2c** (20.3 g, 73.1 mmol), KI (0.01 g, 60.2 μmol), MeCN (200 mL); reaction time: 24 h.

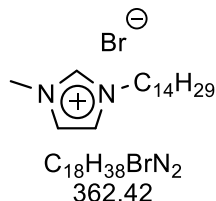

White solid (93 %, 24.53 g, 68.25 mmol); <sup>1</sup>H NMR (300 MHz, CDCl<sub>3</sub>): δ = 0.83–0.93 (t, *J* = 7.1 Hz, 3H), 1.22–1.33 (m, 27H), 1.90 (dt, *J* = 7.1, *J* = 7.4 Hz, 2H), 4.14 (s, 3H), 4.27–4.38 (t, *J* = 7.4 Hz, 2H), 7.37 (t, *J* = 1.8 Hz, 1H), 7.51 (t, *J* = 1.8 Hz, 1H), 10.41 (s, 1H) ppm; <sup>13</sup>C NMR (75 MHz, CDCl<sub>3</sub>) δ 14.10 (1 × CH<sub>3</sub>), 22.66, 26.25, 28.98, 29.33, 29.36, 29.48, 29.57, 29.62, 29.65, 30.30, 31.89, 36.78 (12 × NCH<sub>3</sub>), 50.20 (1 × NCH<sub>2</sub>), 121.72, 123.46 (2 × NCHC), 137.67 (1 × NCHN). The spectroscopic data were in accordance with ref<sup>3</sup>.

### 1-Hexadecyl-3-methylimidazolium bromide ([C<sub>16</sub>mim]Br)

According to GP 1: *N*-Methylimidazole (2.00 g, 24.4 mmol), 1-bromohexadecane **2d** (7.44 g, 24.4 mol), KI (0.01 g, 60.2 μmol), MeCN (200 mL); reaction time: 48 h.

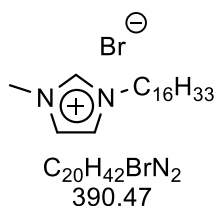

White solid (79 %, 7.50 g, 19.4 mmol); <sup>1</sup>H NMR (300 MHz, CDCl<sub>3</sub>): δ = 0.83–0.93 (t, *J* = 7.1 Hz, 3H), 1.25–1.34 (m, 26H), 1.92 (dt, *J* = 7.1, *J* = 7.5 Hz, 2H), 4.14 (s, 3H), 4.32 (t, *J* = 7.5 Hz, 2H), 7.31 (t, *J* = 1.8 Hz, 1H), 7.43 (t, *J* = 1.8 Hz, 1H), 10.53 (s, 1H) ppm; <sup>13</sup>C NMR (75 MHz, CDCl<sub>3</sub>) δ 14.11 (1 × CH<sub>3</sub>), 22.68, 26.26, 28.98, 29.35, 29.49, 29.58, 29.64, 29.68, 30.29, 31.91 (14 × NCH<sub>3</sub>), 36.79 (1 × CH<sub>3</sub>), 50.24 (1 × NCH<sub>2</sub>), 121.58, 123.26 (2 × NCHC), 137.94 (1 × NCHN).

The spectroscopic data were in accordance with ref<sup>4</sup>.

**General procedure 2 (GP2): Synthesis of 1-Alkyl-3-methylimidazolium carboxylates ([C<sub>n</sub>mim][C<sub>m-1</sub>COO])**

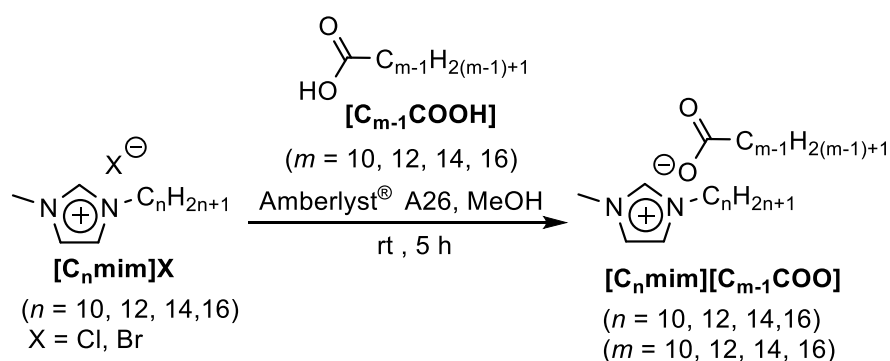

**Scheme 2**

A column was filled with ion exchange resin Amberlyst<sup>®</sup> A26 (20 mL). This was loaded with a carboxylic acid [C<sub>m-1</sub>COOH] (*m* = 10, 12, 14, 16) (5 eq.) dissolved in MeOH (50 mL) with a dripping rate of 2 mL /min. Afterwards the column was thoroughly washed with water and MeOH to get rid of excess acid. Then, the 1-alkyl-3-methylimidazolium halide [C<sub>n</sub>mim]X (*n* = 10, 12, 14, 16) (1 eq.) was dissolved in MeOH (100 mL) and the column was unloaded with a dripping rate of 0.5 mL /min. The solvent was evaporated under reduced pressure and the crude product recrystallized from acetone.

**1-Decyl-3-methylimidazolium decanoate ([C<sub>10</sub>mim][C<sub>10</sub>COO])**

Synthesis according to GP 2. From 1-decyl-3-methylimidazolium chloride [C<sub>10</sub>mim]Cl,

decanoic acid [C<sub>9</sub>COOH], MeOH (50 mL); white solid (88 %, 2.29 g, 5.80 mmol); <sup>1</sup>H NMR (500 MHz, CDCl<sub>3</sub>): δ = 0.87 (m, 6H), 1.16–1.42 (m, 26H), 1.61–1.69 (dt, *J* = 7.8 Hz, 2H), 1.87 (dt, *J* = 7.1 Hz, *J* = 7.4 Hz, 2H), 2.21–2.28 (t, *J* = 7.8 Hz, 2H), 4.09 (s, 3H), 4.30 (t, *J* = 7.4 Hz, 2H), 7.08 (s, 2H), 11.88 (s, 1H) ppm; <sup>13</sup>C NMR (75 MHz, CDCl<sub>3</sub>) δ 14.23 (2 × CH<sub>3</sub>), 22.81, 26.38, 27.36, 29.14, 29.47, 29.50, 29.62, 29.71, 29.76, 29.79, 29.81, 29.87, 30.23, 30.41, 32.03, 32.05 (15 × CH<sub>2</sub>), 36.40 (1 × CH<sub>3</sub>), 39.53 (1 × CH<sub>2</sub>), 50.00 (1 × NCH<sub>2</sub>CH), 120.77, 122.28 (2 × NCHC), 181.21 (1 × COO). The <sup>13</sup>C-peak at δ = 140 ppm for the imidazolium carbon NCHN could not be observed due to the poor signal to noise ratio; FT-IR:  $\tilde{\nu}$  = 3382.34 (m), 3141.07 (m), 2955.80 (s), 2919.95 (vs), 2871.93 (m), 2849.65 (s), 2221.58 (w), 1560.74 (vs), 1465.33 (s), 1394.04 (s), 1334.40 (w), 1303.90 (w), 1270.23 (w), 1235.07 (w), 11689.64 (m), 1104.36 (w), 907.13 (m), 734.63 (vs), 663.85 (m), 628.20 (m), 506.77 (w), 456.46 (w) cm<sup>-1</sup>; MS (ESI): Positive: *m/z* = 223.22 [M<sup>+</sup>]; HRMS (ESI): *m/z* for

$C_{14}H_{27}N_2^+$  calc.: 223.2169  $[M^+]$ , found: 223.2169; MS (ESI): Negative:  $m/z = 171.14$   $[M^-]$ ; HRMS (ESI):  $m/z$  for  $C_{10}H_{19}O_2^-$  calc.: 171.1391  $[M^-]$ , found: 171.1398; DSC: Cr 61 °C [74.2 kJ mol<sup>-1</sup>] SmA 108 °C [2.9 kJ mol<sup>-1</sup>] I; Elemental analysis: calc.: C 73.04, H 11.74, N 7.10; found C 68.63, H 11.70, N 6.64 · 1.5; Water content: 0.33 ± 0.11 wt%.

### 1-Dodecyl-3-methylimidazolium decanoate ([C<sub>12</sub>mim][C<sub>9</sub>COO])

Synthesis according to GP 2. From 1-dodecyl-3-methylimidazolium bromide [C<sub>12</sub>mim]Br,

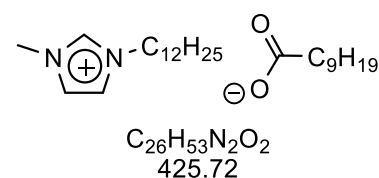 decanoic acid [C<sub>9</sub>COOH], MeOH (50 mL); white solid (69 %, 2.03 g, 4.79 mmol); <sup>1</sup>H NMR (500 MHz, CDCl<sub>3</sub>): δ = 0.87 (m, 6H), 1.16–1.43 (m, 30H), 1.62–1.71 (dt, *J* = 7.8 Hz, 2H), 1.87 (dt, *J* = 7.1 Hz, *J* = 7.4 Hz, 2H), 2.21–2.28 (t, *J* = 7.8 Hz, 2H), 4.09 (s, 3H), 4.30 (t, *J* = 7.4 Hz, 2H), 6.98–7.15 (m, 2H), 11.83 (s, 1H) ppm; <sup>13</sup>C NMR (101 MHz, CDCl<sub>3</sub>) δ 14.22, 14.24 (2 × CH<sub>3</sub>), 22.79, 22.82, 26.38, 27.36, 29.14, 29.44, 29.49, 29.52, 29.62, 29.71, 29.81, 29.87, 30.23, 30.41, 32.02, 32.08 (17 × CH<sub>2</sub>), 36.41 (1 × CH<sub>3</sub>), 39.53 (1 × CH<sub>2</sub>), 50.01 (1 × NCH<sub>2</sub>CH), 120.78, 122.28 (2 × NCHC), , 181.21 (1 × COO). The <sup>13</sup>C-peak at δ = 140 ppm for the imidazolium carbon NCHN could not be observed due to the poor signal to noise ratio; FT-IR:  $\tilde{\nu}$  = 3140.15 (m), 3033.92 (m), 2955.46 (m), 2918.69 (vs), 2849.994 (s), 2199.75 (w), 1558.62 (vs), 1466.88 (m), 1397.10 (m), 1336.36 (w), 1304.05 (w), 1171.43 (m), 1105.19 (w), 609.38 (s), 727.66 (vs), 641.78 (m), 627.39 (m) cm<sup>-1</sup>; MS (ESI): Positive:  $m/z = 251.25$   $[M^+]$ ; HRMS (ESI):  $m/z$  for  $C_{16}H_{31}N_2^+$  calc.: 252.2482  $[M^+]$ , found: 251.2483; MS (ESI): Negative:  $m/z = 171.14$   $[M^-]$ ; HRMS (ESI):  $m/z$  for  $C_{10}H_{19}O_2^-$  calc.: 171.1391  $[M^-]$ , found: 171.1391; DSC: Cr 43 °C [63.4 kJ mol<sup>-1</sup>] SmA 122 °C [3.5 kJ mol<sup>-1</sup>] I; Water content: 1.11 ± 0.11 wt%.

### 1-Tetradecyl-3-methylimidazolium decanoate ([C<sub>14</sub>mim][C<sub>9</sub>COO])

Synthesis according to GP 2. From 1-tetradecyl - 3-methylimidazolium bromide [C<sub>14</sub>mim]Br,

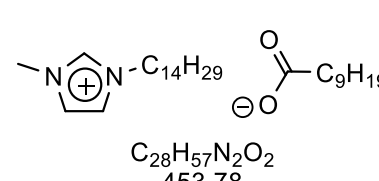 decanoic acid [C<sub>9</sub>COOH], MeOH (50 mL); white solid (79 %, 1.97 g, 4.38 mmol); <sup>1</sup>H NMR (500 MHz, CDCl<sub>3</sub>): δ = 0.84–0.91 (m, 6H), 1.18–1.39 (m, 34H), 1.66 (dt, *J* = 7.8 Hz, 2H), 1.83–1.90 (dt, *J* = 7.1 Hz, *J* = 7.4 Hz, 2H), 2.21–2.28 (t, *J* = 7.8 Hz, 2H), 4.09 (s, 3H), 4.30 (t, *J* = 7.4 Hz, 2H), 7.07 (s, 2H), 11.87 (s, 1H) ppm.; <sup>13</sup>C NMR (101 MHz, CDCl<sub>3</sub>) δ 14.23 (2 × CH<sub>3</sub>), 22.79, 22.81, 26.38, 27.33, 29.14, 29.46, 29.49, 29.52, 29.62, 29.71, 29.75, 29.79, 29.80, 29.86, 30.21, 30.41, 32.03, 32.07 (19 × CH<sub>2</sub>), 36.41 (1 × CH<sub>3</sub>), 39.46 (1 × CH<sub>2</sub>), 50.01 (1 × NCH<sub>2</sub>CH), 120.80, 122.32 (2 × NCHC), 181.14 (1 × COO). The <sup>13</sup>C-peak at δ = 140 ppm for the imidazolium carbon NCHN could not be observed

due to the poor signal to noise ratio; FT-IR:  $\tilde{\nu}$  = 3144.73 (w), 2922.34 (s), 2852.80 (m), 2211.16 (w), 1557.35 (s), 1466.19 (m), 1392.08 (m), 1305.66 (w), 1170.37 (w), 907.15 (s), 728.98 (vs), 641.05 (m), 625.53 (m)  $\text{cm}^{-1}$ ; MS (ESI): Positive:  $m/z$  = 279.28  $[\text{M}^+]$ ; HRMS (ESI):  $m/z$  for  $\text{C}_{18}\text{H}_{35}\text{N}_2^+$  calc.: 279.2795  $[\text{M}^+]$ , found: 279.2796; MS (ESI): Negative:  $m/z$  = 171.14  $[\text{M}^-]$ ; HRMS (ESI):  $m/z$  for  $\text{C}_{10}\text{H}_{19}\text{O}_2^-$  calc.: 171.1391  $[\text{M}^-]$ , found: 171.1399; DSC: Cr 47 °C [77.1  $\text{kJ mol}^{-1}$ ] SmA 126 °C [3.2  $\text{kJ mol}^{-1}$ ] I.; Water content:  $0.56 \pm 0.11$  wt%.

### 1-Hexadecyl-3-methylimidazolium decanoate ( $[\text{C}_{16}\text{mim}][\text{C}_9\text{COO}]$ )

Synthesis according to GP 2. From 1-hexadecyl-3-methylimidazolium bromide  $[\text{C}_{16}\text{mim}]\text{Br}$ ,

decanoic acid  $[\text{C}_9\text{COOH}]$ , MeOH (50 mL); white solid (92 %, 2.28 g, 4.76 mmol);  $^1\text{H}$  NMR (500 MHz,  $\text{CDCl}_3$ ):  $\delta$  = 0.88 (m, 6H), 1.19–1.39 (m, 38H), 1.62–1.70 (dt,  $J=7.8$  Hz, 2H), 1.87 (dt,  $J = 7.1$  Hz,  $J = 7.4$  Hz, 2H), 2.20–2.30 (t,  $J=7.8$  Hz, 2H), 4.09 (s, 3H), 4.30 (t,  $J = 7.4$  Hz, 2H), 7.08 (s, 2H), 11.80 (s, 1H) ppm;  $^{13}\text{C}$  NMR (75 MHz,  $\text{CDCl}_3$ )  $\delta$  14.24 ( $2 \times \text{CH}_3$ ), 22.81, 26.38, 27.35, 29.15, 29.48, 29.50, 29.53, 29.63, 29.72, 29.77, 29.81, 29.87, 30.22, 30.41, 32.04, 32.08 ( $21 \times \text{CH}_2$ ), 36.41 ( $1 \times \text{CH}_3$ ), 39.52 ( $1 \times \text{CH}_2$ ), 50.01 ( $1 \times \text{NCH}_2\text{CH}$ ), 120.77, 122.27 ( $2 \times \text{NCHC}$ ), 181.24 ( $1 \times \text{COO}$ ). The  $^{13}\text{C}$ -peak at  $\delta$  = 140 ppm for the imidazolium carbon NCHN could not be observed due to the poor signal to noise ratio; FT-IR:  $\tilde{\nu}$  = 2922.16 (s), 2851.59 (m), 2206.85 (w), 1558.22 (s), 1461.71 (m), 1309.59 (m), 1304.97 (w), 1168.59 (w), 907.07 (s), 727.93 (vs), 639.21 (m)  $\text{cm}^{-1}$ ; MS (ESI): Positive:  $m/z$  = 307.31  $[\text{M}^+]$ ; HRMS (ESI):  $m/z$  for  $\text{C}_{20}\text{H}_{39}\text{N}_2^+$  calc.: 307.3108  $[\text{M}^+]$ , found: 307.3108; MS (ESI): Negative:  $m/z$  = 171.14  $[\text{M}^-]$ ; HRMS (ESI):  $m/z$  for  $\text{C}_{10}\text{H}_{19}\text{O}_2^-$  calc.: 171.1391  $[\text{M}^-]$ , found: 171.1392; DSC: Cr 55 °C [90.1  $\text{kJ mol}^{-1}$ ] SmA 146 °C [3.6  $\text{kJ mol}^{-1}$ ] I.; Water content:  $0.59 \pm 0.11$  wt%.

### 1-Decyl-3-methylimidazolium dodecanoate ( $[\text{C}_{10}\text{mim}][\text{C}_{11}\text{COO}]$ )

Synthesis according to GP 2. From 1-decyl-3-methylimidazolium chloride  $[\text{C}_{10}\text{mim}]\text{Cl}$ ,

dodecanoic acid  $[\text{C}_{11}\text{COOH}]$ , MeOH (50 mL); white solid (83 %, 1.15 g, 2.72 mmol);  $^1\text{H}$  NMR (500 MHz,  $\text{CDCl}_3$ ):  $\delta$  = 0.88 (m, 6H), 1.28 (m, 30H), 1.66 (dt,  $J = 7.8$  Hz, 2H), 1.87 (dt,  $J = 7.1$  Hz,  $J = 7.4$  Hz, 2H), 2.21–2.27 (t,  $J = 7.8$  Hz, 2H), 4.08 (s, 3H), 4.28–4.33 (t,  $J = 7.4$  Hz, 2H), 7.06 (s, 2H), 11.84 (s, 1H) ppm;  $^{13}\text{C}$  NMR (75 MHz,  $\text{CDCl}_3$ )  $\delta$  14.21, 14.24 ( $2 \times \text{CH}_3$ ), 22.77, 22.81, 26.38, 27.36, 29.14, 29.36, 29.49, 29.57, 29.81, 29.87, 30.23, 30.41, 31.96, 32.06 ( $17 \times \text{CH}_2$ ), 36.41 ( $1 \times \text{CH}_3$ ), 39.53 ( $1 \times \text{CH}_2$ ), 50.01 ( $1 \times \text{NCH}_2\text{CH}$ ), 120.78, 122.28 ( $2 \times \text{NCHC}$ ), 181.24 ( $1 \times \text{COO}$ ). The  $^{13}\text{C}$ -peak at  $\delta$  = 140 ppm for

the imidazolium carbon NCHN could not be observed due to the poor signal to noise ratio.; FT-IR:  $\tilde{\nu}$  = 2923.99 (m), 2853.87 (m), 2212.85 (w), 1556.48 (m), 1466.02 (w), 1392.39 (m), 1170.97 (w), 906.45 (s), 726.77 (vs), 641.42 (m), 625.05 (m)  $\text{cm}^{-1}$ ; MS (ESI): Positive:  $m/z$  = 223.22 [ $\text{M}^+$ ]; HRMS (ESI):  $m/z$  for  $\text{C}_{14}\text{H}_{27}\text{N}_2^+$  calc.: 223.2169 [ $\text{M}^+$ ], found: 223.2168; MS (ESI): Negative:  $m/z$  = 199.17 [ $\text{M}^-$ ]; HRMS (ESI):  $m/z$  for  $\text{C}_{14}\text{H}_{23}\text{O}_2^-$  calc.: 199.1704 [ $\text{M}^-$ ], found: 199.1701; DSC: Cr 42 °C [68.0  $\text{kJ mol}^{-1}$ ] SmA 144 °C [3.7  $\text{kJ mol}^{-1}$ ] I.; Water content:  $1.48 \pm 0.11$  wt%.

### 1-Dodecyl-3-methylimidazolium dodecanoate ([ $\text{C}_{12}\text{mim}$ ][ $\text{C}_{11}\text{COO}$ ])

Synthesis according to GP 2. From 1-dodecyl-3-methylimidazolium bromide [ $\text{C}_{12}\text{mim}$ ] $\text{Br}$ ,

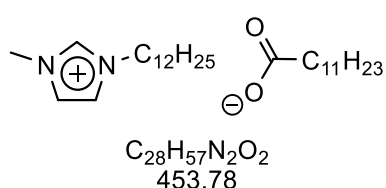

dodecanoic acid [ $\text{C}_{11}\text{COOH}$ ], MeOH (50 mL); white solid

(95 %, 2.56 g, 5.68 mmol);  $^1\text{H}$  NMR (500 MHz,  $\text{CDCl}_3$ ):  $\delta$  = 0.84–0.91 (m, 6H), 1.16–1.39 (m, 34H), 1.63–1.71 (dt,  $J$  = 7.8 Hz, 2H), 1.84–1.90 (dt,  $J$  = 7.1 Hz,  $J$  = 7.4 Hz, 2H), 2.21–2.28 (t,  $J$  = 7.8 Hz, 2H), 4.09 (s, 2H), 4.30 (t,  $J$  = 7.4 Hz, 2H), 7.06 (s, 2H), 11.87 (s, 1H) ppm;  $^{13}\text{C}$  NMR (101 MHz,  $\text{CDCl}_3$ )  $\delta$  14.22 ( $2 \times \text{CH}_3$ ), 22.79, 22.81, 26.38, 27.15, 29.14, 29.45, 29.50, 29.62, 29.71, 29.81, 29.84, 29.87, 30.15, 30.42, 32.02, 32.06 ( $19 \times \text{CH}_2$ ), 36.43 ( $1 \times \text{CH}_3$ ), 39.04 ( $1 \times \text{CH}_2$ ), 50.03 ( $1 \times \text{NCH}_2\text{CH}$ ), 120.81, 122.30 ( $2 \times \text{NCHC}$ ), 141.73 ( $1 \times \text{NCHN}$ ), 180.87 ( $1 \times \text{COO}$ ); FT-IR:  $\tilde{\nu}$  = 2923.57 (m), 2853.17 (m), 2221.68 (w), 1557.69 (m), 1466.19 (w), 1391.97 (w), 1171.59 (w), 905.93 (s), 726.35 (vs), 642.12 (m)  $\text{cm}^{-1}$ ; MS (ESI): Positive:  $m/z$  = 251.25 [ $\text{M}^+$ ]; HRMS (ESI):  $m/z$  for  $\text{C}_{16}\text{H}_{31}\text{N}_2^+$  calc.: 251.2482 [ $\text{M}^+$ ], found: 251.2482; MS (ESI): Negative:  $m/z$  = 199.17 [ $\text{M}^-$ ]; HRMS (ESI):  $m/z$  for  $\text{C}_{12}\text{H}_{23}\text{O}_2^-$  calc.: 199.1693 [ $\text{M}^-$ ], found: 199.1694; DSC: Cr 48 °C [79.6  $\text{kJ mol}^{-1}$ ] SmA 118 °C [3.0  $\text{kJ mol}^{-1}$ ] I.; Water content:  $1.95 \pm 0.11$  wt%.

### 1-Tetradecyl-3-methylimidazolium dodecanoate ([ $\text{C}_{14}\text{mim}$ ][ $\text{C}_{11}\text{COO}$ ])

Synthesis according to GP 2. From 1-tetradecyl-3-methylimidazolium bromide [ $\text{C}_{14}\text{mim}$ ] $\text{Br}$ ,

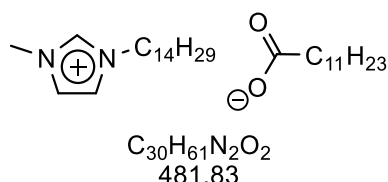

dodecanoic acid [ $\text{C}_{11}\text{COOH}$ ], MeOH (50 mL); white solid

(93 %, 2.48 g, 5.18 mmol);  $^1\text{H}$  NMR (500 MHz,  $\text{CDCl}_3$ ):  $\delta$  = 0.88 (m, 6H), 1.19–1.39 (m, 38H), 1.66 (dt,  $J$  = 7.8 Hz, 2H), 1.87 (dt,  $J$  = 7.1 Hz,  $J$  = 7.4 Hz, 2H), 2.21–2.27 (t,  $J$  = 7.8 Hz, 2H), 4.09 (s, 3H), 4.30 (t,  $J$  = 7.4 Hz, 2H), 7.03–7.08 (m, 2H), 11.89 (s, 1H) ppm;  $^{13}\text{C}$  NMR (75 MHz,  $\text{CDCl}_3$ )  $\delta$  14.10 ( $2 \times \text{CH}_3$ ), 22.68, 26.25, 27.23, 29.01, 29.34, 29.37, 29.49, 29.58, 29.63, 29.66, 29.68, 29.74, 30.10, 30.28, 31.90, 31.92 ( $21 \times \text{CH}_2$ ), 36.27 ( $1 \times \text{CH}_3$ ), 39.40 ( $1 \times \text{CH}_2$ ), 49.87 ( $1 \times \text{NCH}_2\text{CH}$ ), 120.64, 122.15 ( $2 \times \text{NCHC}$ ), 181.08

(1 × COO). The  $^{13}\text{C}$ -peak at  $\delta = 140$  ppm for the imidazolium carbon NCHN could not be observed due to the poor signal to noise ratio.; FT-IR:  $\tilde{\nu} = 2919.53$  (m), 2850.69 (m), 2194.98 (w), 1560.00 (m), 1466.43 (w), 1400.79 (w), 1169.83 (w), 906.35 (s), 724.68 (vs), 641.36 (m), 625.96 (m)  $\text{cm}^{-1}$ ; MS (ESI): Positive:  $m/z = 279.28$  [ $\text{M}^+$ ]; HRMS (ESI):  $m/z$  for  $\text{C}_{18}\text{H}_{35}\text{N}_2^+$  calc.: 279.2795 [ $\text{M}^+$ ], found: 279.2795; MS (ESI): Negative:  $m/z = 199.17$  [ $\text{M}^-$ ]; HRMS (ESI):  $m/z$  for  $\text{C}_{12}\text{H}_{23}\text{O}_2^-$  calc.: 199.1704 [ $\text{M}^-$ ], found: 199.1709; DSC: Cr 57 °C [78.5 kJ mol $^{-1}$ ] SmA 139 °C [2.7 kJ mol $^{-1}$ ] I.; Water content: 0.66 ± 0.11 wt%.

### 1-Hexadecyl-3-methylimidazolium dodecanoate ([C<sub>16</sub>mim][C<sub>11</sub>COO])

Synthesis according to GP 2. From 1-hexadecyl-3-methylimidazolium bromide [C<sub>16</sub>mim]Br,

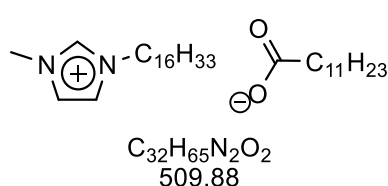

dodecanoic acid [C<sub>11</sub>COOH], MeOH (50 mL); white solid

(76 %, 2.00 g, 3.95 mmol);  $^1\text{H}$  NMR (500 MHz,  $\text{CDCl}_3$ ):  $\delta =$  0.88 (m, 6H), 1.19–1.39 (m, 42H), 1.62–1.70 (dt,  $J = 7.8$  Hz, 2H), 1.87 (dt,  $J = 7.1$  Hz,  $J = 7.4$  Hz, 2H), 2.20–2.27 (t,  $J = 7.8$  Hz, 2H), 4.08 (s, 3H), 4.30 (t,  $J = 7.4$  Hz, 2H), 7.08 (s, 2H), 11.79 (s, 1H) ppm.;  $^{13}\text{C}$  NMR (101 MHz,  $\text{CDCl}_3$ )  $\delta$  14.19 (2 ×  $\text{CH}_3$ ), 22.77, 26.35, 27.28, 29.11, 29.44, 29.47, 29.60, 29.64, 29.69, 29.74, 29.78, 29.82, 29.84, 30.19, 30.38, 32.01, 32.02 (23 ×  $\text{CH}_3$ ), 36.38 (1 ×  $\text{CH}_3$ ), 39.37 (1 ×  $\text{CH}_2$ ), 49.97 (1 ×  $\text{NCH}_2\text{CH}$ ), 120.85, 120.88, 122.41 (2 ×  $\text{NCHC}$ ), 141.51 (1 ×  $\text{NCHN}$ ), 180.96 (1 ×  $\text{COO}$ ); FT-IR:  $\tilde{\nu} = 3373.84$  (w), 3139.23 (w), 3030.54 (w), 2954.60 (m), 2915.28 (vs), 2849.12 (s), 1678.43 (w), 1557.17 (vs), 1467.27 (m), 1399.95 (s), 1335.79 (w), 1309.09 (w), 1281.34 (w), 1252.77 (w), 907.78 (m), 776.23 (m), 734.27 (s), 664.98 (m), 628.51 (m), 519.24 (w), 466.41 (w)  $\text{cm}^{-1}$ ; MS (ESI): Positive:  $m/z = 307.31$  [ $\text{M}^+$ ]; HRMS (ESI):  $m/z$  for  $\text{C}_{20}\text{H}_{39}\text{N}_2^+$  calc.: 307.3108 [ $\text{M}^+$ ], found: 307.3112; MS (ESI): Negative:  $m/z = 199.17$  [ $\text{M}^-$ ]; HRMS (ESI):  $m/z$  for  $\text{C}_{12}\text{H}_{23}\text{O}_2^-$  calc.: 199.1704 [ $\text{M}^-$ ], found: 199.1692; DSC: Cr 55 °C [76.6 kJ mol $^{-1}$ ] SmA 126 °C [2.3 kJ mol $^{-1}$ ] I.; Water content: 1.60 ± 0.11 wt%.

### 1-Decyl-3-methylimidazolium tetradecanoate ([C<sub>10</sub>mim][C<sub>13</sub>COO])

Synthesis according to GP 2. From 1-decyl-3-methylimidazolium chloride [C<sub>10</sub>mim]Cl,

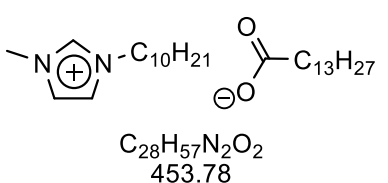

tetradecanoic acid [C<sub>13</sub>COOH], MeOH (50 mL); white solid

(94 %, 2.78 g, 6.17 mmol);  $^1\text{H}$  NMR (500 MHz,  $\text{CDCl}_3$ ):  $\delta =$  0.88 (m, 6H), 1.19–1.39 (m, 34H), 1.62–1.70 (dt,  $J = 7.8$  Hz, 2H), 1.84–1.90 (dt,  $J = 7.1$  Hz,  $J = 7.4$  Hz, 2H), 2.21–2.27 (t,  $J = 7.8$  Hz, 2H), 4.09 (s, 3H), 4.27–4.33 (t,  $J = 7.4$  Hz, 2H), 7.08 (s, 2H), 11.76 (s, 1H) ppm;  $^{13}\text{C}$  NMR (101 MHz,  $\text{CDCl}_3$ )  $\delta$  14.17, 14.19 (2 ×  $\text{CH}_3$ ), 22.73, 22.77, 26.35, 27.17, 29.10, 29.33, 29.45, 29.54, 29.75, 29.82, 29.84, 30.15, 30.39, 31.92, 32.01 (19 ×  $\text{CH}_2$ ), 36.41 (2 ×  $\text{CH}_3$ ), 39.12

(2 × CH<sub>2</sub>), 50.00 (1 × NCH<sub>2</sub>CH), 122.48, 122.50 (2 × NCHC), 141.28 (1 × NCHN), 180.78 (1 × COO); FT-IR:  $\tilde{\nu}$  = 3383.37 (w), 3147.27 (w), 3073.71 (w), 2955.41 (m), 2921.61 (s), 2852.03 (s), 2190.05 (w), 1558.77 (s), 1465.42 (m), 1309.80 (m), 1306.64 (w), 1171.66 (m), 1090.55 (w), 907.37 (m), 728.03 (vs), 639.91 (m), 626.93 (m), 569.91 (w) cm<sup>-1</sup>; MS (ESI): Positive:  $m/z$  = 223.22 [M<sup>+</sup>]; HRMS (ESI):  $m/z$  for C<sub>14</sub>H<sub>27</sub>N<sub>2</sub><sup>+</sup> calc.: 223.2169 [M<sup>+</sup>], found: 223.2169; MS (ESI): Negative:  $m/z$  = 227.20 [M<sup>-</sup>]; HRMS (ESI):  $m/z$  for C<sub>14</sub>H<sub>27</sub>O<sub>2</sub><sup>-</sup> calc.: 227.2017 [M<sup>-</sup>], found: 227.2017; DSC: Cr 37 °C [58.1 kJ mol<sup>-1</sup>] SmA 132 °C [0.3 kJ mol<sup>-1</sup>] I.; Water content: 0.89 ± 0.11 wt%.

### 1-Dodecyl-3-methylimidazolium tetradecanoate ([C<sub>12</sub>mim][C<sub>13</sub>COO])

Synthesis according to GP 2. From 1-dodecyl-3-methylimidazolium bromide [C<sub>12</sub>mim]Br,

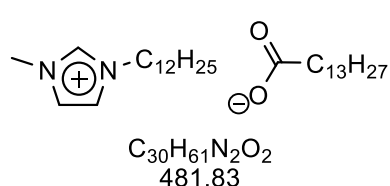

tetradecanoic acid [C<sub>13</sub>COOH], MeOH (50 mL); white solid

(86 %, 2.26 g, 4.46 mmol); <sup>1</sup>H NMR (500 MHz, CDCl<sub>3</sub>): δ = 0.88 (m, 6H), 1.21–1.38 (m, 38H), 1.62–1.70 (dt,  $J$  = 7.8 Hz, 2H), 1.87 (dt,  $J$  = 7.1 Hz,  $J$  = 7.4 Hz, 2H), 2.20–2.27 (t,  $J$  = 7.8 Hz, 2H), 4.08 (s, 3H), 4.30 (t,  $J$  = 7.4 Hz, 2H), 7.08 (s, 2H), 11.79 (s, 1H) ppm; <sup>13</sup>C NMR (101 MHz, CDCl<sub>3</sub>) δ 14.17 (2 × CH<sub>3</sub>), 22.74, 22.76, 26.34, 27.35, 29.10, 29.40, 29.44, 29.45, 29.58, 29.66, 29.74, 29.80, 29.82, 29.84, 30.21, 30.37, 31.97, 32.00 (21 × CH<sub>2</sub>), 36.34 (1 × CH<sub>3</sub>), 39.53 (1 × CH<sub>2</sub>), 49.94 (1 × NCH<sub>2</sub>CH), 120.84, 122.42 (2 × NCHC), 181.02 (1 × COO). The <sup>13</sup>C-peak at δ = 140 ppm for the imidazolium carbon NCHN could not be observed due to the poor signal to noise ratio.; FT-IR:  $\tilde{\nu}$  = 2917.48 (s), 2849.98 (m), 2188.73 (w), 2015.08 (w), 1556.68 (s), 1466.31 (m), 1395.07 (m), 1172.36 (m), 906.54 (s), 726.96 (vs), 638.69 (m) cm<sup>-1</sup>; MS (ESI): Positive:  $m/z$  = 251.25 [M<sup>+</sup>]; HRMS (ESI):  $m/z$  for C<sub>16</sub>H<sub>31</sub>N<sub>2</sub><sup>+</sup> calc.: 251.2482 [M<sup>+</sup>], found: 251.2473; MS (ESI): Negative:  $m/z$  = 227.20 [M<sup>-</sup>]; HRMS (ESI):  $m/z$  for C<sub>14</sub>H<sub>27</sub>O<sub>2</sub><sup>-</sup> calc.: 227.2017 [M<sup>-</sup>], found: 227.2014; DSC: Cr 59 °C [145.7 kJ mol<sup>-1</sup>] SmA 127 °C [5.2 kJ mol<sup>-1</sup>] I.; Water content: 0.99 ± 0.11 wt%.

### 1-Tetradecyl-3-methylimidazolium tetradecanoate ([C<sub>14</sub>mim][C<sub>13</sub>COO])

Synthesis according to GP 2. From 1-tetradecyl-3-methylimidazolium bromide [C<sub>14</sub>mim]Br,

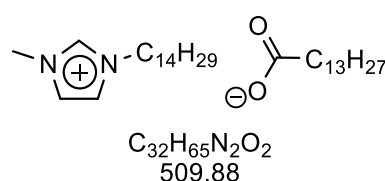

tetradecanoic acid [C<sub>13</sub>COOH], MeOH (50 mL); white solid

(84 %, 2.41 g, 4.75 mmol); <sup>1</sup>H NMR (500 MHz, CDCl<sub>3</sub>): δ = 0.88 (m, 6H), 1.22–1.38 (m, 42H), 1.62 (dt,  $J$  = 7.8 Hz, 2H), 1.88 (dt,  $J$  = 7.1 Hz,  $J$  = 7.4 Hz, 2H), 2.21–2.27 (t,  $J$  = 7.8 Hz, 2H), 4.09 (s, 3H), 4.29 (t,  $J$  = 7.4 Hz, 2H), 7.19–7.32 (m, 2H), 11.11 (s, 1H) ppm.; <sup>13</sup>C NMR (75 MHz, CDCl<sub>3</sub>) δ 14.23 (2 × CH<sub>3</sub>), 22.80, 26.38, 26.74, 29.13, 29.47, 29.49, 29.63, 29.72,

29.76, 29.79, 29.82, 29.85, 29.99, 30.41, 32.04 ( $23 \times \text{CH}_2$ ), 36.60 ( $1 \times \text{CH}_3$ ), 38.10 ( $1 \times \text{CH}_2$ ), 50.15 ( $1 \times \text{NCH}_2\text{CH}$ ), 121.14, 122.72 ( $2 \times \text{NCHC}$ ), 140.21 ( $1 \times \text{NCHN}$ ), 180.18 ( $1 \times \text{COO}$ ).; FT-IR:  $\tilde{\nu} = 2921.73$  (m), 2851.07 (m), 2198.76 (w), 1560.13 (m), 1466.55 (w), 1400.51 (w), 1170.30 (w), 905.99 (s), 725.52 (vs), 641.67 (m), 625.84 (w)  $\text{cm}^{-1}$ ; MS (ESI): Positive:  $m/z = 279.28$  [ $\text{M}^+$ ]; HRMS (ESI):  $m/z$  for  $\text{C}_{18}\text{H}_{35}\text{N}_2^+$  calc.: 279.2795 [ $\text{M}^+$ ], found: 279.2795; MS (ESI): Negative:  $m/z = 227.20$  [ $\text{M}^-$ ]; HRMS (ESI):  $m/z$  for  $\text{C}_{14}\text{H}_{27}\text{O}_2^-$  calc.: 227.2018 [ $\text{M}^-$ ], found: 227.2017; POM: Cr 70 °C, SmA 129 °C; Water content:  $0.65 \pm 0.11$  wt%.

### 1-Hexadecyl-3-methylimidazolium tetradecanoate ([**C<sub>16</sub>mim**][**C<sub>13</sub>COO**])

Synthesis according to GP 2. From 1-hexadecyl-3-methylimidazolium bromide [**C<sub>16</sub>mim**]**Br**,

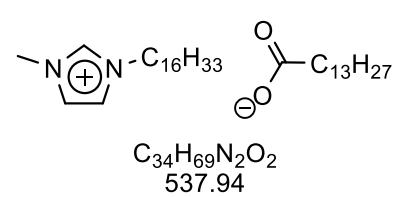
 tetradecanoic acid [**C<sub>13</sub>COOH**], MeOH (50 mL); white solid (77 %, 2.13 g, 3.98 mmol);  $^1\text{H}$  NMR (500 MHz,  $\text{CDCl}_3$ ):  $\delta = 0.85\text{--}0.91$  (m, 6H), 1.25 (m, 46H), 1.66 (dt,  $J = 7.8$  Hz, 2H), 1.86 (dt,  $J = 7.1$  Hz, 7.5 Hz, 2H), 2.21–2.28 (t,  $J = 7.8$  Hz, 2H), 4.09 (s, 3H), 4.27–4.34 (t,  $J = 7.5$  Hz, 2H), 6.98–7.12 (m, 2H), 11.92 (s, 1H) ppm.;  $^{13}\text{C}$  NMR (101 MHz,  $\text{CDCl}_3$ )  $\delta$  14.23 ( $2 \times \text{CH}_3$ ), 22.81, 26.39, 27.38, 29.15, 29.48, 29.50, 29.64, 29.73, 29.78, 29.80, 29.82, 29.86, 29.87, 29.89, 30.25, 30.42, 32.05 ( $25 \times \text{CH}_2$ ), 36.43 ( $1 \times \text{CH}_3$ ), 39.55 ( $1 \times \text{CH}_2$ ), 50.03 ( $1 \times \text{NCH}_2\text{CH}$ ), 120.77, 122.27 ( $2 \times \text{NCHC}$ ), 181.24 ( $1 \times \text{COO}$ ). The  $^{13}\text{C}$ -peak at  $\delta = 140$  ppm for the imidazolium carbon NCHN could not be observed due to the poor signal to noise ratio.; FT-IR:  $\tilde{\nu} = 3136.38$  (w), 3031.85 (w), 2955.00 (m), 2914.78 (vs), 2848.63 (s), 1558.79 (s), 1466.80 (m), 1424.32 (w), 1401.04 (m), 1288.17 (w), 11171.14 (w), 905.87 (w), 778.17 (w), 720.50 (m), 664.00 (w), 627.95 (w)  $\text{cm}^{-1}$ ; MS (ESI): Positive:  $m/z = 307.31$  [ $\text{M}^+$ ]; HRMS (ESI):  $m/z$  for  $\text{C}_{20}\text{H}_{39}\text{N}_2^+$  calc.: 307.3108 [ $\text{M}^+$ ], found: 307.3099; MS (ESI): Negative:  $m/z = 227.20$  [ $\text{M}^-$ ]; HRMS (ESI):  $m/z$  for  $\text{C}_{14}\text{H}_{27}\text{O}_2^-$  calc.: 227.2017 [ $\text{M}^-$ ], found: 227.2033; DSC: Cr 58 °C [ $89.2 \text{ kJ mol}^{-1}$ ] SmA 150 °C [ $2.1 \text{ kJ mol}^{-1}$ ] I; Water content:  $0.89 \pm 0.11$  wt%.

### 1-Decyl-3-methylimidazolium hexadecanoate ([**C<sub>10</sub>mim**][**C<sub>15</sub>COO**])

Synthesis according to GP 2. From 1-decyl-3-methylimidazolium chloride [**C<sub>10</sub>mim**]**Cl**,

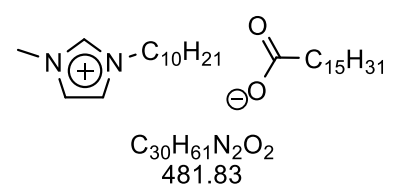
 hexadecanoic acid [**C<sub>15</sub>COOH**], MeOH (50 mL); white solid (89 %, 3.34 g, 6.98 mmol);  $^1\text{H}$  NMR (500 MHz,  $\text{CDCl}_3$ ):  $\delta = 0.88$  (m, 6H), 1.18–1.40 (m, 38H), 1.62–1.70 (dt,  $J = 7.8$  Hz, 2H), 1.84–1.90 (dt,  $J = 7.1$  Hz, 7.5 Hz, 2H), 2.20–2.27 (t,  $J = 7.8$  Hz, 2H), 4.08 (s, 3H), 4.27–4.33 (t,  $J = 7.5$  Hz, 2H), 7.08 (s, 2H), 11.83 (s, 1H) ppm.;  $^{13}\text{C}$  NMR (75 MHz,  $\text{CDCl}_3$ )  $\delta$  14.12 ( $2 \times \text{CH}_3$ ), 14.14, 22.67, 22.71, 26.28, 27.34, 29.05, 29.27, 29.39, 29.48, 29.68, 29.74, 29.78, 30.17, 30.33, 31.86, 31.95 ( $21 \times \text{CH}_2$ ), 36.25 ( $1 \times \text{CH}_3$ ), 39.56

(1 × CH<sub>2</sub>), 49.86 (1 × NCH<sub>2</sub>CH), 120.85, 122.45 (2 × NCHC), 180.92 (1 × COO). The <sup>13</sup>C-peak at δ = 140 ppm for the imidazolium carbon NCHN could not be observed due to the poor signal to noise ratio.; FT-IR:  $\tilde{\nu}$  = 3142.83 (m), 3029.11 (m), 2955.88 (m), 2917.17 (vs), 2847.36 (vs), 1669.60 (w), 1557.29 (vs), 1464.00 (m), 1424.45 (m), 1399.78 (s), 1286.67 (w), 1274.08 (w), 1170.73 (m), 1098.36 (w), 1021.81 (w), 904.88 (w), 777.53 (m), 738.15 (m), 721.53 (s), 663.83 (m), 627.46 (m), 520.01 (w), 490.04 (w) cm<sup>-1</sup>; MS (ESI): Positive:  $m/z$  = 223.22 [M<sup>+</sup>]; HRMS (ESI):  $m/z$  for C<sub>14</sub>H<sub>27</sub>N<sub>2</sub><sup>+</sup> calc.: 223.2169 [M<sup>+</sup>], found: 223.2168; MS (ESI): Negative:  $m/z$  = 255.23 [M<sup>-</sup>]; HRMS (ESI):  $m/z$  for C<sub>16</sub>H<sub>31</sub>O<sub>2</sub><sup>-</sup> calc.: 255.2330 [M<sup>-</sup>], found: 255.2331; DSC: Cr 54 °C [75.7 kJ mol<sup>-1</sup>] SmA 128 °C [2.6 kJ mol<sup>-1</sup>] I.; Water content: 0.17 ± 0.11 wt%.

### 1-Dodecyl-3-methylimidazolium hexadecanoate ([C<sub>12</sub>mim][C<sub>15</sub>COO])

Synthesis according to GP 2. From 1-dodecyl-3-methylimidazolium bromide [C<sub>12</sub>mim]Br, hexadecanoic acid [C<sub>15</sub>COOH], MeOH (50 mL); white solid

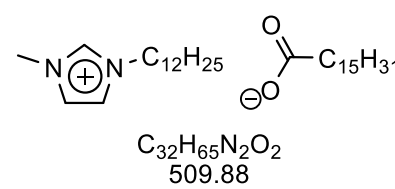 (96 %, 3.38 g, 6.66 mmol); <sup>1</sup>H NMR (500 MHz, CDCl<sub>3</sub>): δ = 0.88 (m, 6H), 1.18–1.41 (m, 42H), 1.65 (dt,  $J$  = 7.8 Hz, 2H), 1.87 (dt,  $J$  = 7.1 Hz, 7.4 Hz, 2H), 2.20–2.27 (t,  $J$  = 7.8 Hz, 2H), 4.08 (s, 3H), 4.30 (t,  $J$  = 7.4 Hz, 2H), 7.08 (s, 2H), 11.74 (s, 1H) ppm.; <sup>13</sup>C NMR (75 MHz, CDCl<sub>3</sub>) δ 14.18 (2 × CH<sub>3</sub>), 22.75, 26.33, 27.25, 29.10, 29.40, 29.44, 29.57, 29.66, 29.73, 29.79, 29.82, 30.17, 30.38, 31.97, 31.99 (23 × CH<sub>2</sub>), 36.32 (1 × CH<sub>3</sub>), 39.32 (1 × CH<sub>2</sub>), 49.93 (1 × NCH<sub>2</sub>CH), 120.84, 122.40 (2 × NCHC), 141.56 (1 × NCHN), 180.91 (1 × COO); FT-IR:  $\tilde{\nu}$  = 3135.80 (m), 3029.15 (m), 2956.07 (m), 2915.15 (vs), 2848.20 (s), 2290.28 (w), 1673.16 (w), 1557.47 (s), 1464.35 (m), 1425.18 (m), 1400.41 (s), 1315.09 (w), 1287.94 (w), 1274.69 (w), 1253.53 (w), 1232.22 (w), 1172.29 (m), 1097.94 (w), 907.19 (m), 779.02 (m), 722.77 (s), 664.47 (m), 628.53 (m), 569.74 (w), 491.08 (w) cm<sup>-1</sup>; MS (ESI): Positive:  $m/z$  = 251.25 [M<sup>+</sup>]; HRMS (ESI):  $m/z$  for C<sub>16</sub>H<sub>31</sub>N<sub>2</sub><sup>+</sup> calc.: 251.2482 [M<sup>+</sup>], found: 251.2478; MS (ESI): Negative:  $m/z$  = 255.23 [M<sup>-</sup>]; HRMS (ESI):  $m/z$  for C<sub>16</sub>H<sub>31</sub>O<sub>2</sub><sup>-</sup> calc.: 255.2330 [M<sup>-</sup>], found: 255.2328; DSC: Cr 52 °C [98.9 kJ mol<sup>-1</sup>] SmA 138 °C [3.3 kJ mol<sup>-1</sup>] I.; Water content: 0.66 ± 0.11 wt%.

### 1-Tetradecyl-3-methylimidazolium hexadecanoate ([C<sub>14</sub>mim][C<sub>15</sub>COO])

Synthesis according to GP 2. From 1-tetradecyl-3-methylimidazolium bromide [C<sub>14</sub>mim]Br, hexadecanoic acid [C<sub>15</sub>COOH], MeOH (50 mL); white solid

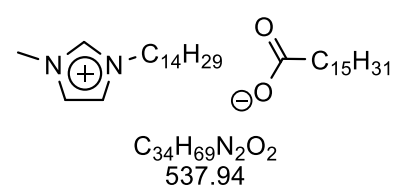 (96 %, 2.86 g, 5.35 mmol); <sup>1</sup>H NMR (500 MHz, CDCl<sub>3</sub>): δ = 0.88 (m, 6H), 1.20–1.40 (m, 46H), 1.65 (dt,  $J$  = 7.8 Hz, 2H), 1.86 (dt,  $J$  = 7.1 Hz,  $J$  = 7.4 Hz, 2H), 2.21–2.28 (t,  $J$  = 7.8 Hz, 2H), 4.08 (s, 3H), 4.30 (t,  $J$  = 7.4 Hz, 2H), 7.06 (m, 2H), 11.81 (s, 1H) ppm.; <sup>13</sup>C NMR

(75 MHz, CDCl<sub>3</sub>)  $\delta$  14.20 (2  $\times$  CH<sub>3</sub>), 22.77, 26.35, 27.35, 29.12, 29.44, 29.47, 29.60, 29.69, 29.73, 29.76, 29.81, 29.85, 30.22, 30.39, 32.01 (25  $\times$  CH<sub>2</sub>), 36.35 (1  $\times$  CH<sub>3</sub>), 39.53 (1  $\times$  CH<sub>2</sub>), 49.95 (1  $\times$  NCH<sub>2</sub>CH), 120.83, 122.38 (2  $\times$  NCHC), 181.09 (1  $\times$  COO). The <sup>13</sup>C-peak at  $\delta$  = 140 ppm for the imidazolium carbon NCHN could not be observed due to the poor signal to noise ratio.; FT-IR:  $\tilde{\nu}$  = 3136.92 (m), 3029.84 (m), 2956.17 (m), 2914.66 (vs), 2848.50 (s), 1673.64 (w), 1558.74 (s), 1466.40 (m), 1424.78 (w), 1401.29 (m), 1274.16 (w), 1170.36 (m), 903.81 (w), 771.93 (m), 720.70 (m), 665.15 (m), 628.04 (m), 520.72 (w), 489.24 (w), 456.17 (w), 421.74 (w) cm<sup>-1</sup>; MS (ESI): Positive:  $m/z$  = 279.28 [M<sup>+</sup>]; HRMS (ESI):  $m/z$  for C<sub>18</sub>H<sub>35</sub>N<sub>2</sub><sup>+</sup> calc.: 279.2795 [M<sup>+</sup>], found: 279.2787; MS (ESI): Negative:  $m/z$  = 255.23 [M<sup>-</sup>]; HRMS (ESI):  $m/z$  for C<sub>16</sub>H<sub>31</sub>O<sub>2</sub><sup>-</sup> calc.: 255.2330 [M<sup>-</sup>], found: 255.2336; DSC: Cr 64 °C [103.6 kJ mol<sup>-1</sup>] SmA 150 °C [4.0 kJ mol<sup>-1</sup>] I.; Water content: 0.81  $\pm$  0.11 wt%.

### 1-Hexadecyl-3-methylimidazolium hexadecanoate ([C<sub>16</sub>mim][C<sub>15</sub>COO])

Synthesis according to GP 2. From 1-hexadecyl-3-methylimidazolium bromide [C<sub>16</sub>mim]Br,

hexadecanoic acid [C<sub>15</sub>COOH], MeOH (50 mL); white solid (90 %, 1.43 g, 4.65 mmol), <sup>1</sup>H NMR (500 MHz, CDCl<sub>3</sub>):  $\delta$  = 0.88 (t,  $J$  = 6.9 Hz, 6H), 1.21–1.33 (m, 50H), 1.66 (dt,  $J$  = 7.8 Hz, 2H), 1.87 (dt,  $J$  = 7.1 Hz,  $J$  = 7.4 Hz, 2H), 2.21–2.27 (t,  $J$  = 7.8 Hz, 2H), 4.09 (s, 3H), 4.30 (t,  $J$  = 7.4 Hz, 2H), 7.07 (m, 2H), 11.88 (s, 1H) ppm.; <sup>13</sup>C NMR (101 MHz, CDCl<sub>3</sub>)  $\delta$  14.24 (2  $\times$  CH<sub>3</sub>), 22.82, 26.39, 27.39, 29.16, 29.50, 29.64, 29.74, 29.80, 29.83, 29.86, 29.89, 29.90, 30.26, 30.43, 32.06 (27  $\times$  CH<sub>2</sub>), 36.41 (1  $\times$  CH<sub>3</sub>), 39.57 (1  $\times$  CH<sub>2</sub>), 50.02 (1  $\times$  NCH<sub>2</sub>CH), 120.71, 122.18 (2  $\times$  NCHC), 181.27 (1  $\times$  COO<sup>-</sup>). The <sup>13</sup>C-peak at  $\delta$  = 140 ppm for the imidazolium carbon NCHN could not be observed due to the poor signal to noise ratio.; FT-IR:  $\tilde{\nu}$  = 3261.69 (w), 3140.68 (w), 2954.21 (m), 2914.12 (vs), 2872.25 (w), 2848.64 (s), 1688.00 (w), 1565.67 (s), 1470.85 (m), 1399.12 (m), 1176.83 (w), 1097.67 (w), 908.20 (w), 730.33 (m), 719.74 (m), 641.22 (w), 567.05 (w) cm<sup>-1</sup>; -MS (ESI): Positive:  $m/z$  = 307.31 [M<sup>+</sup>]; HRMS (ESI):  $m/z$  for C<sub>20</sub>H<sub>39</sub>N<sub>2</sub><sup>+</sup> calc.: 307.3108 [M<sup>+</sup>], found: 307.3108; HRMS (ESI): Negative:  $m/z$  = 255.23 [M<sup>-</sup>]; HRMS (ESI):  $m/z$  for C<sub>16</sub>H<sub>31</sub>O<sub>2</sub><sup>-</sup> calc.: 255.2330 [M<sup>-</sup>], found: 255.2333; DSC: Cr 79 °C [73.8 kJ mol<sup>-1</sup>] SmA 133 °C [1.4 kJ mol<sup>-1</sup>] I.; Water content: 0.09  $\pm$  0.11 wt%.

### 3. NMR spectra

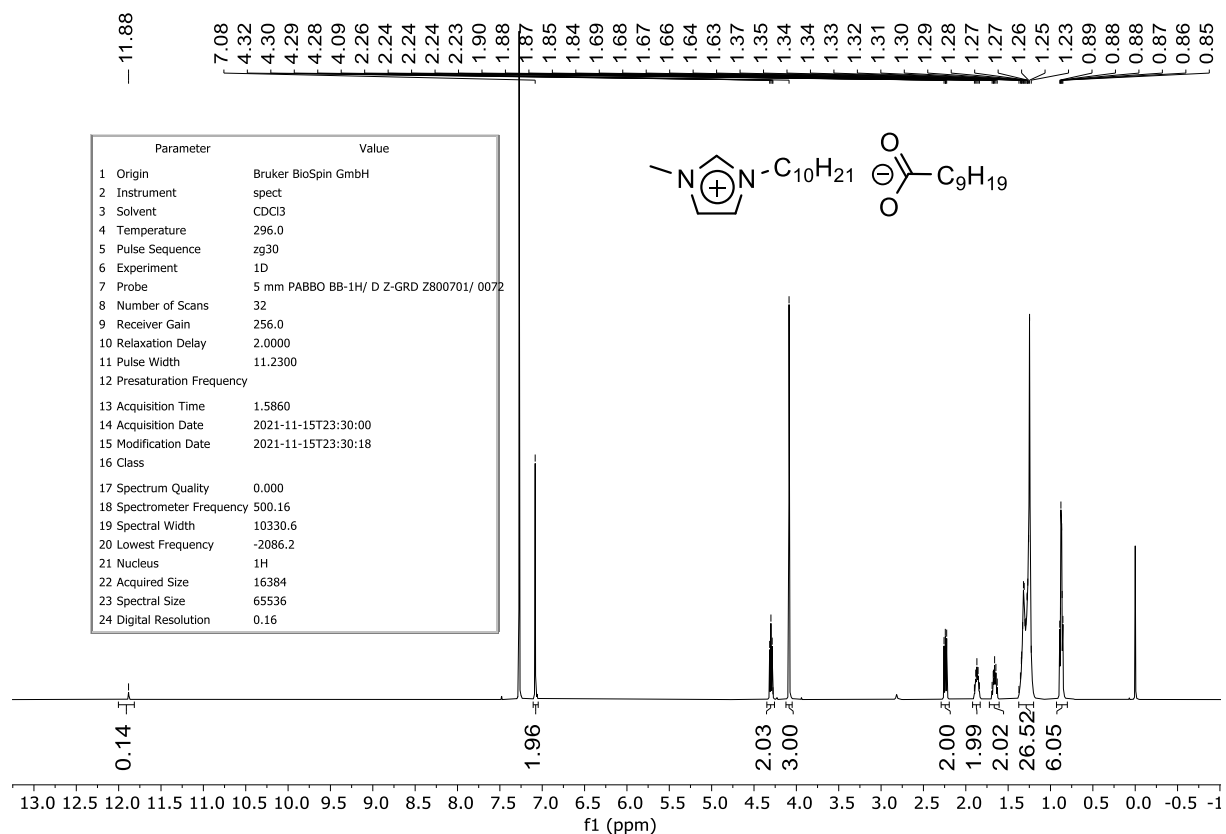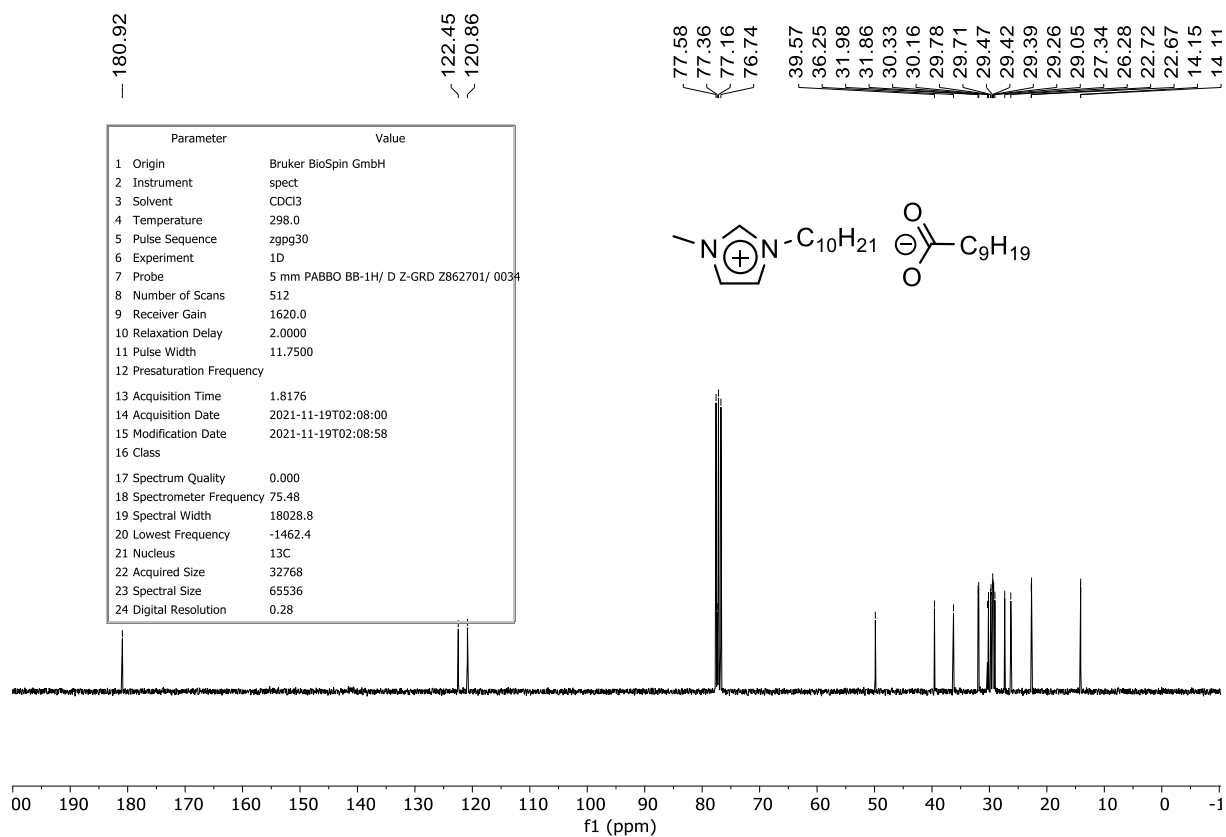

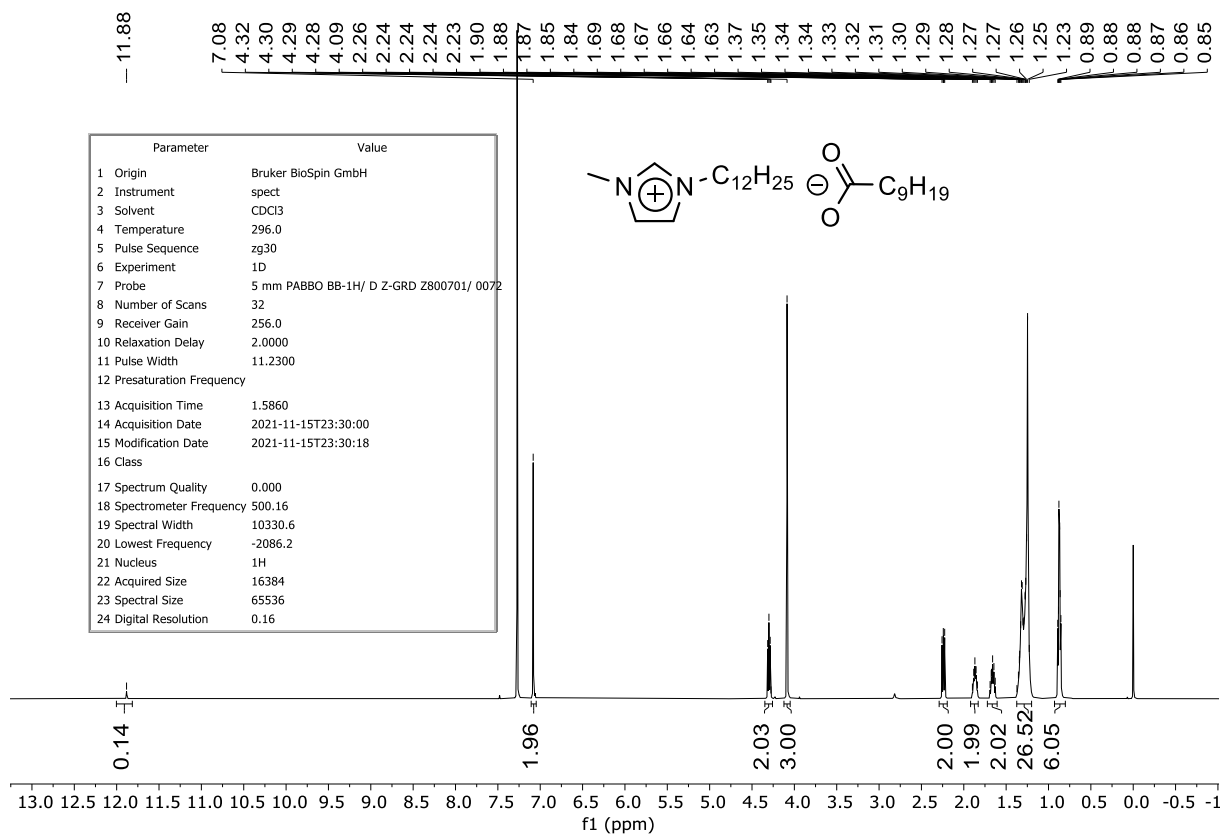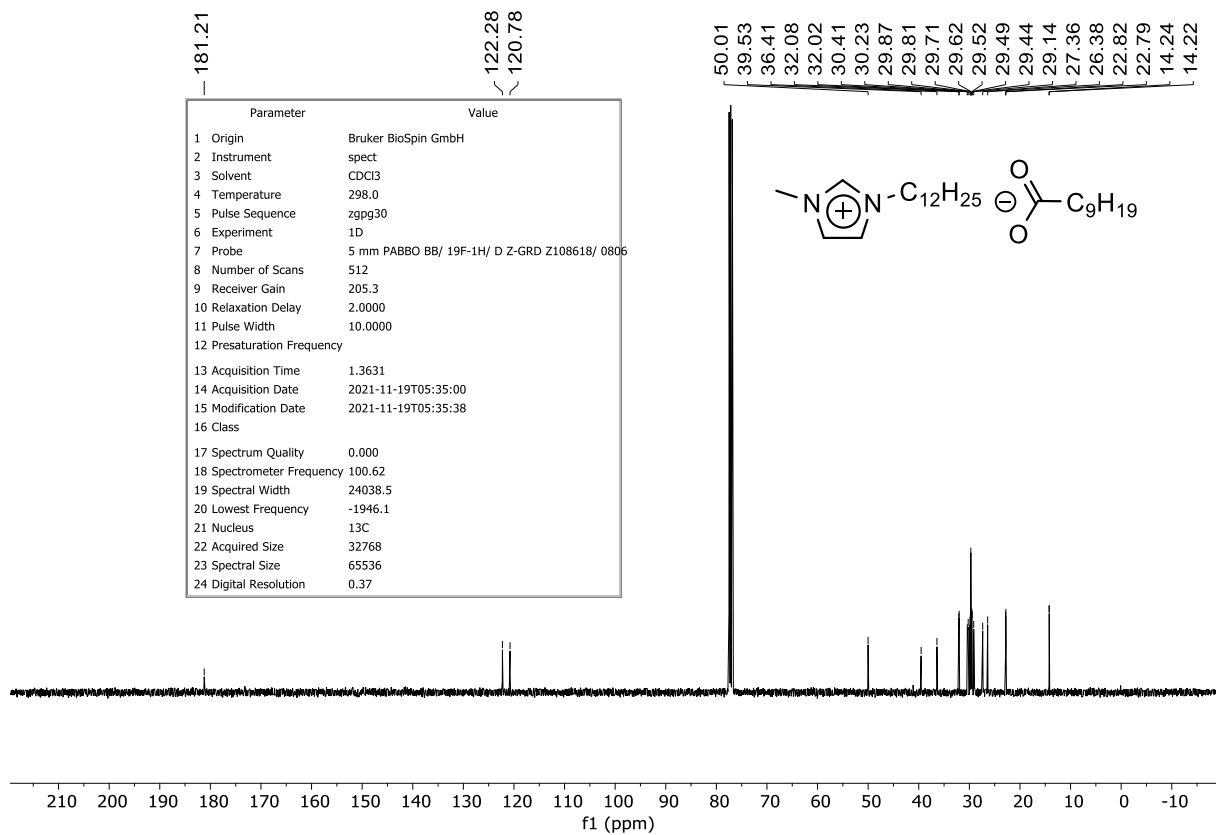

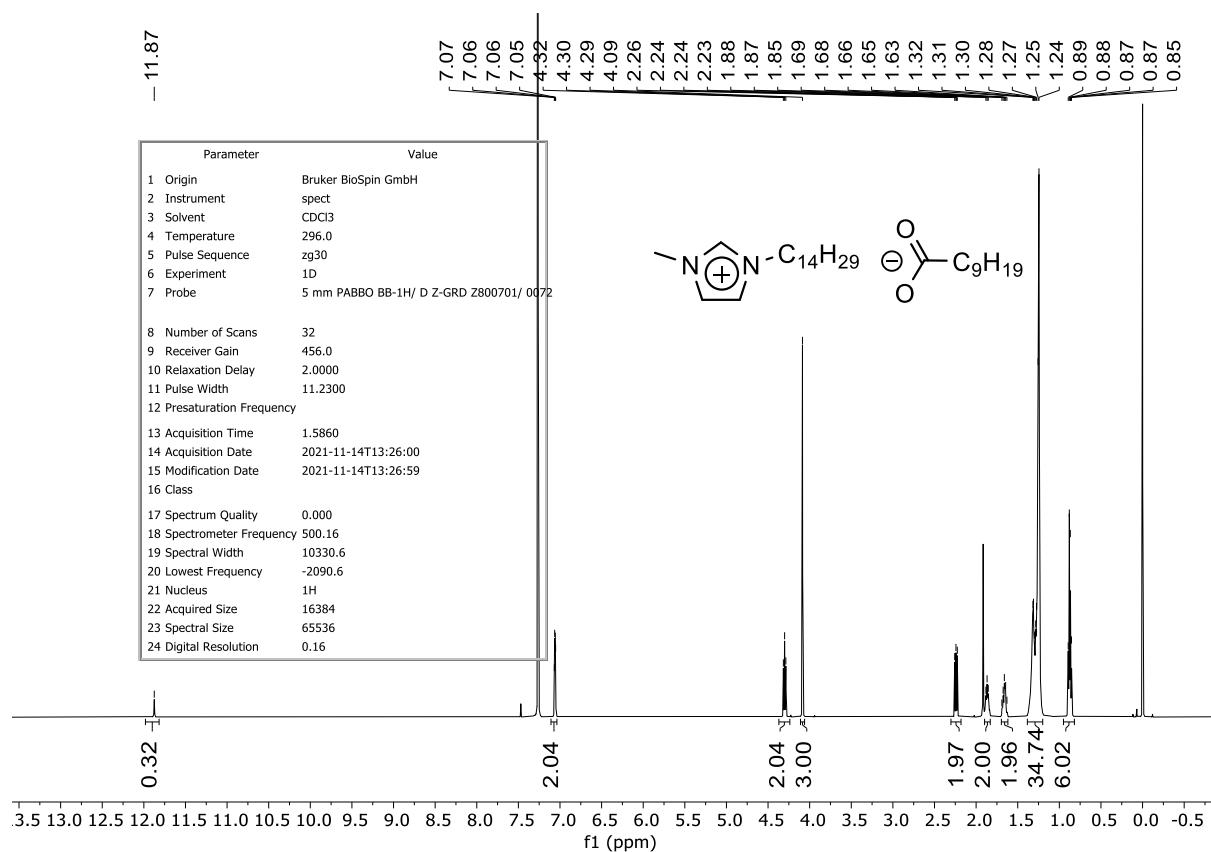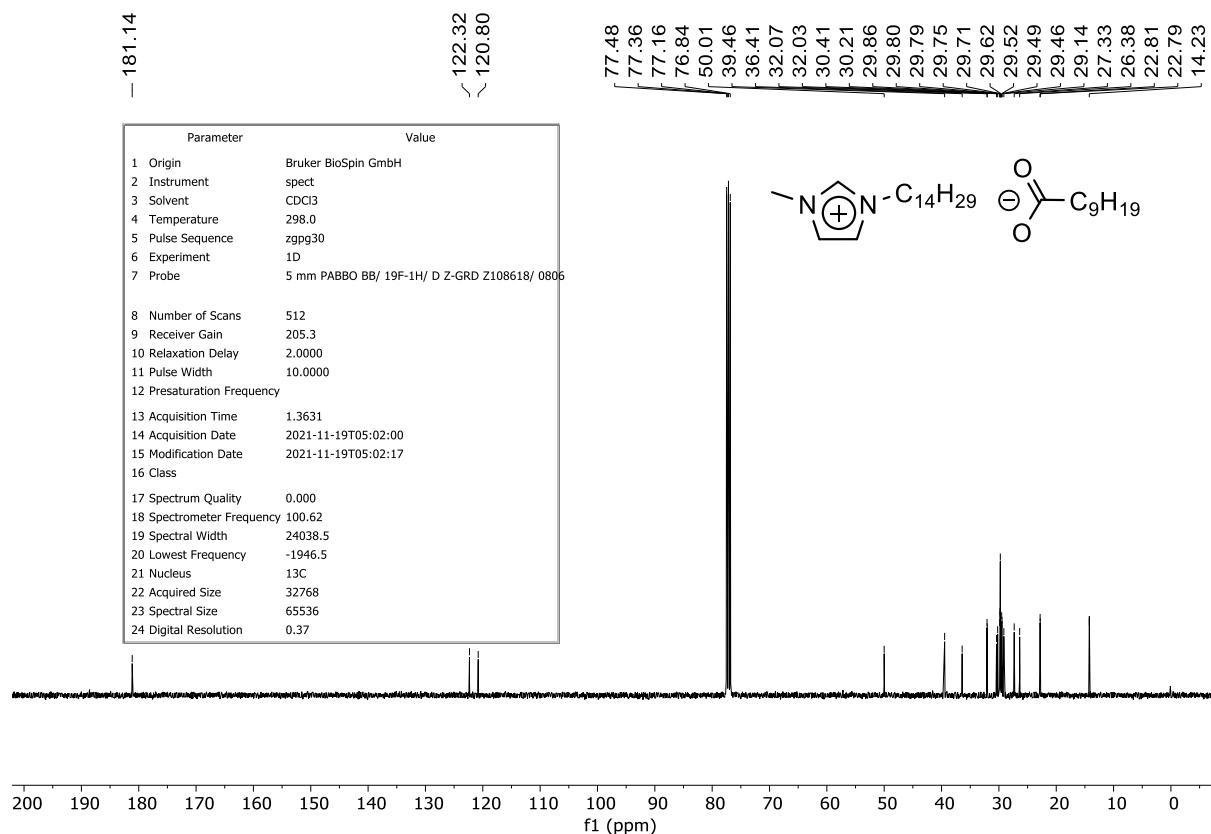

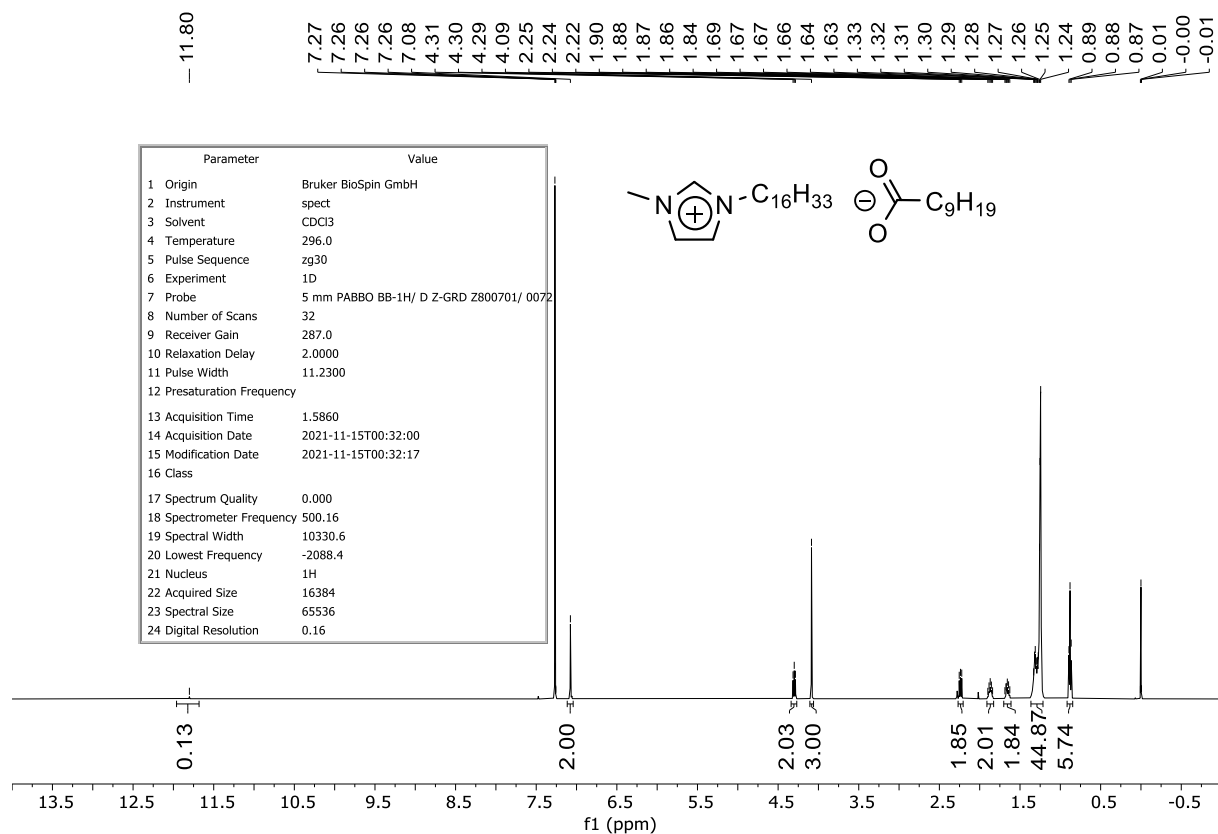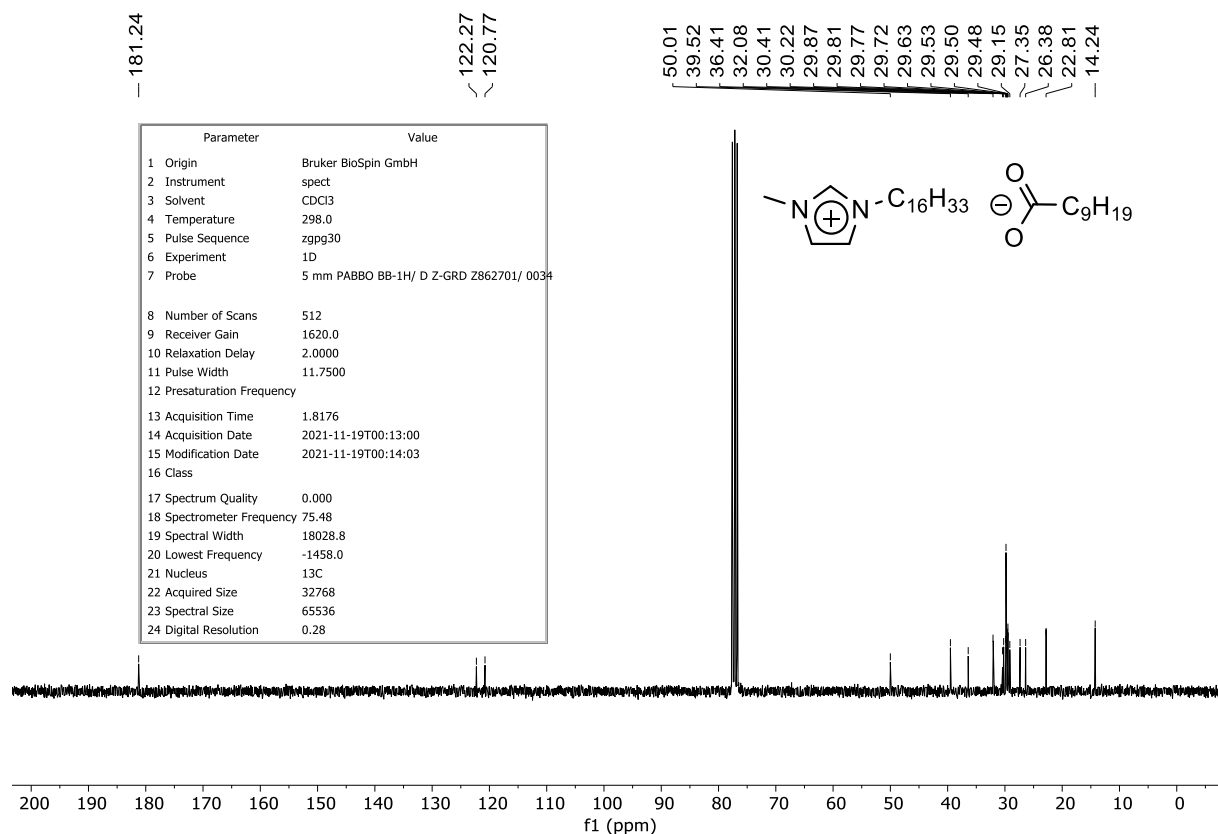

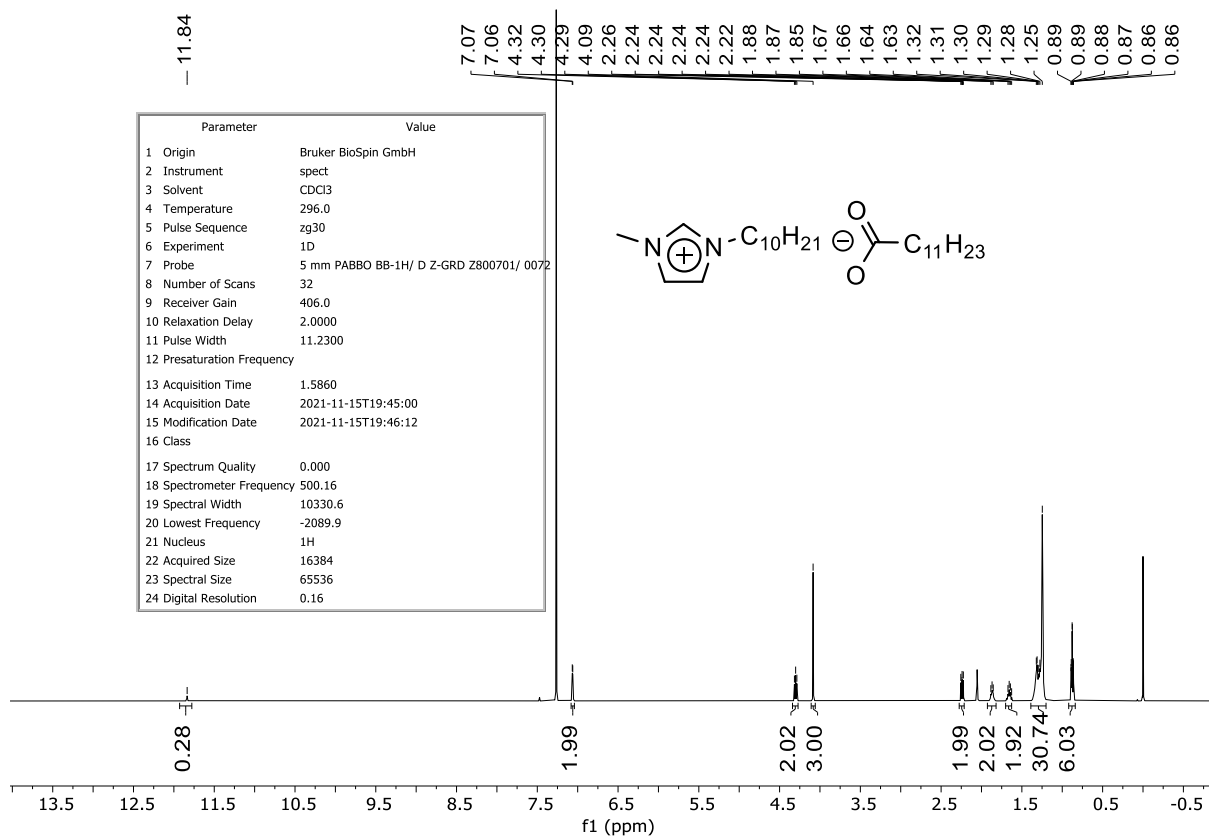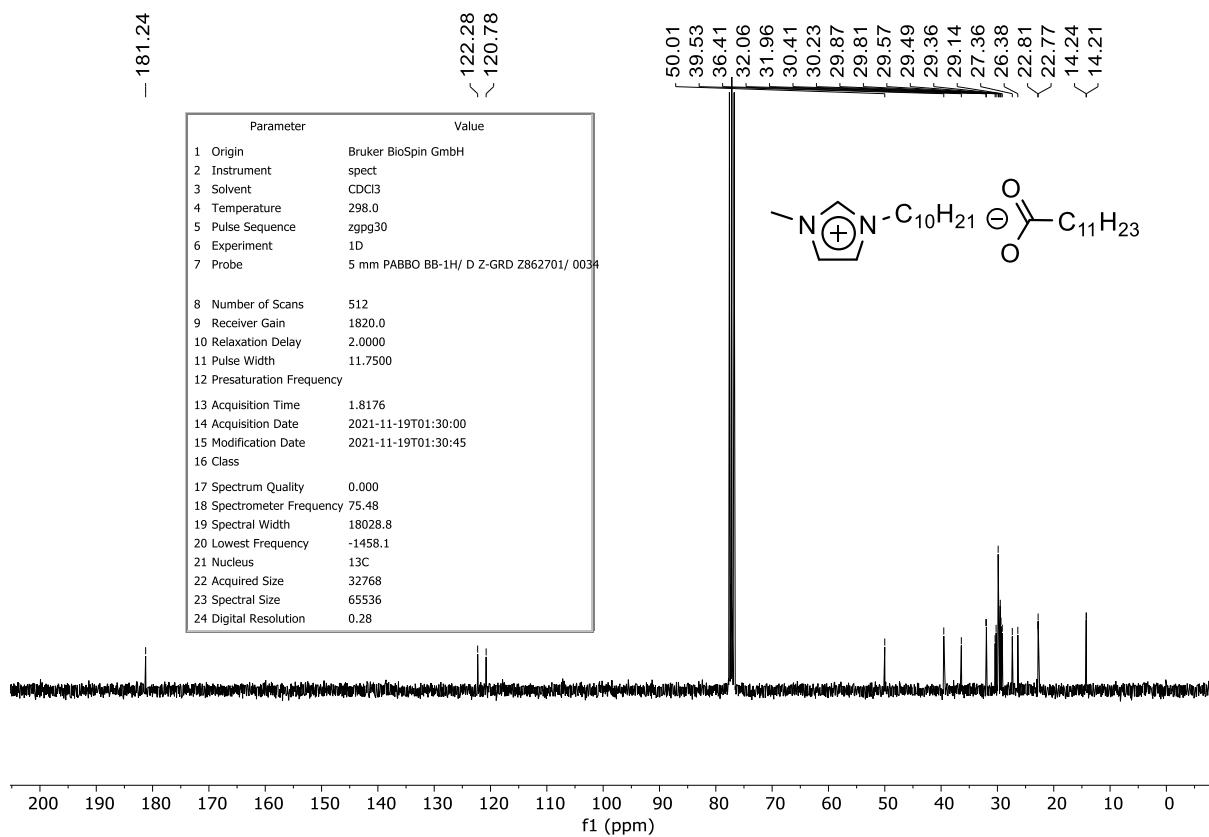

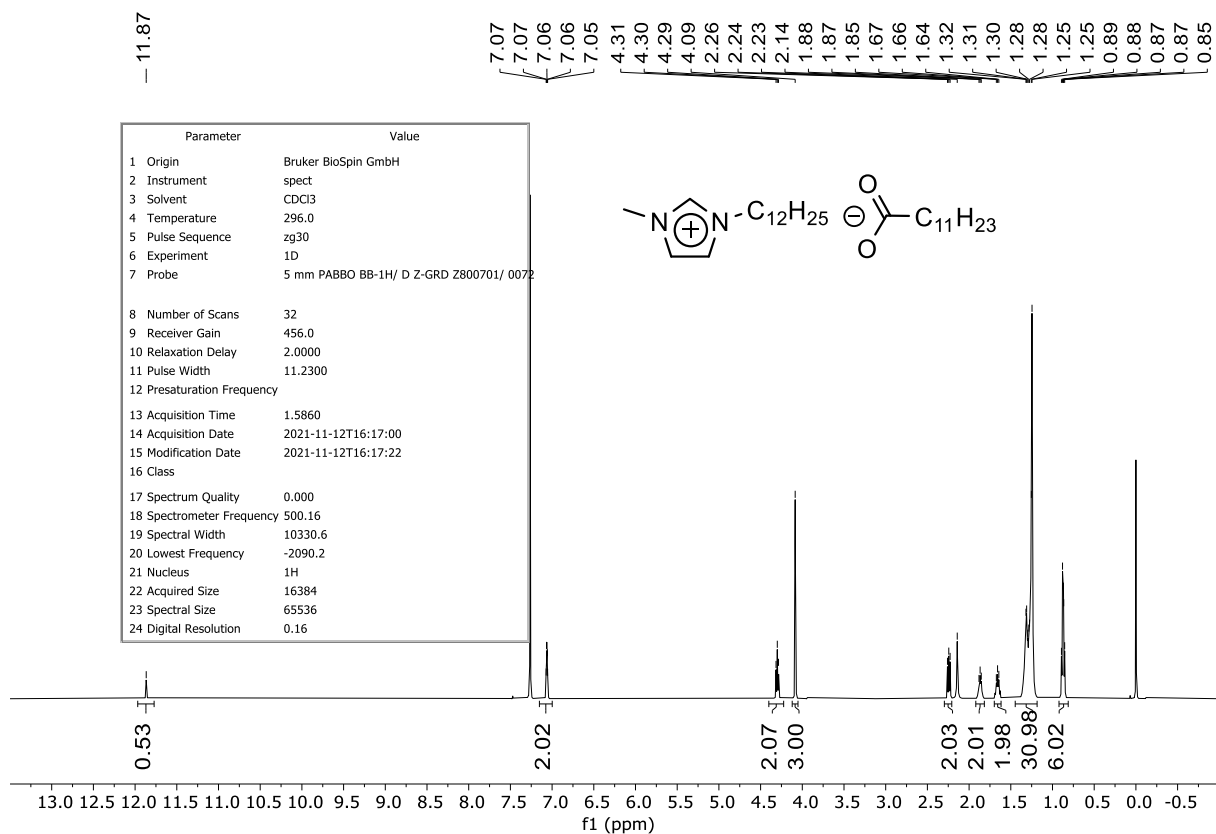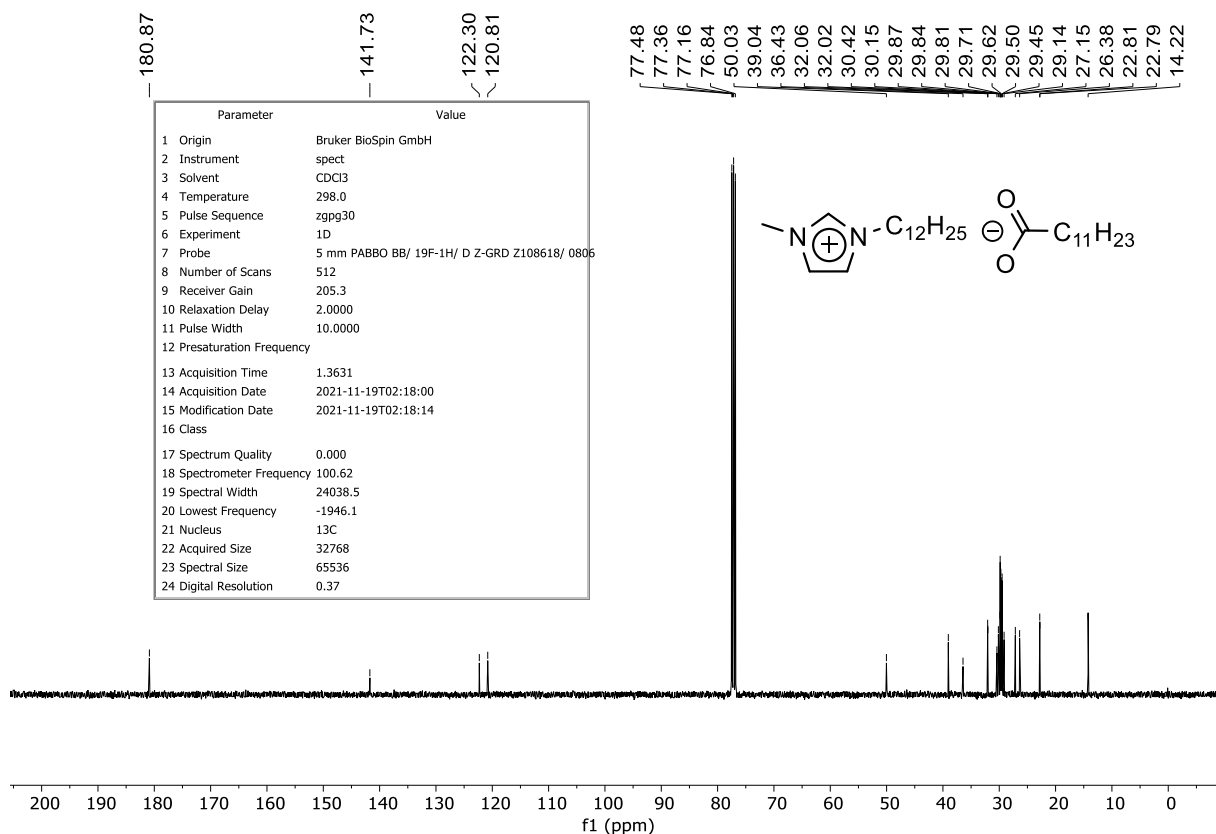

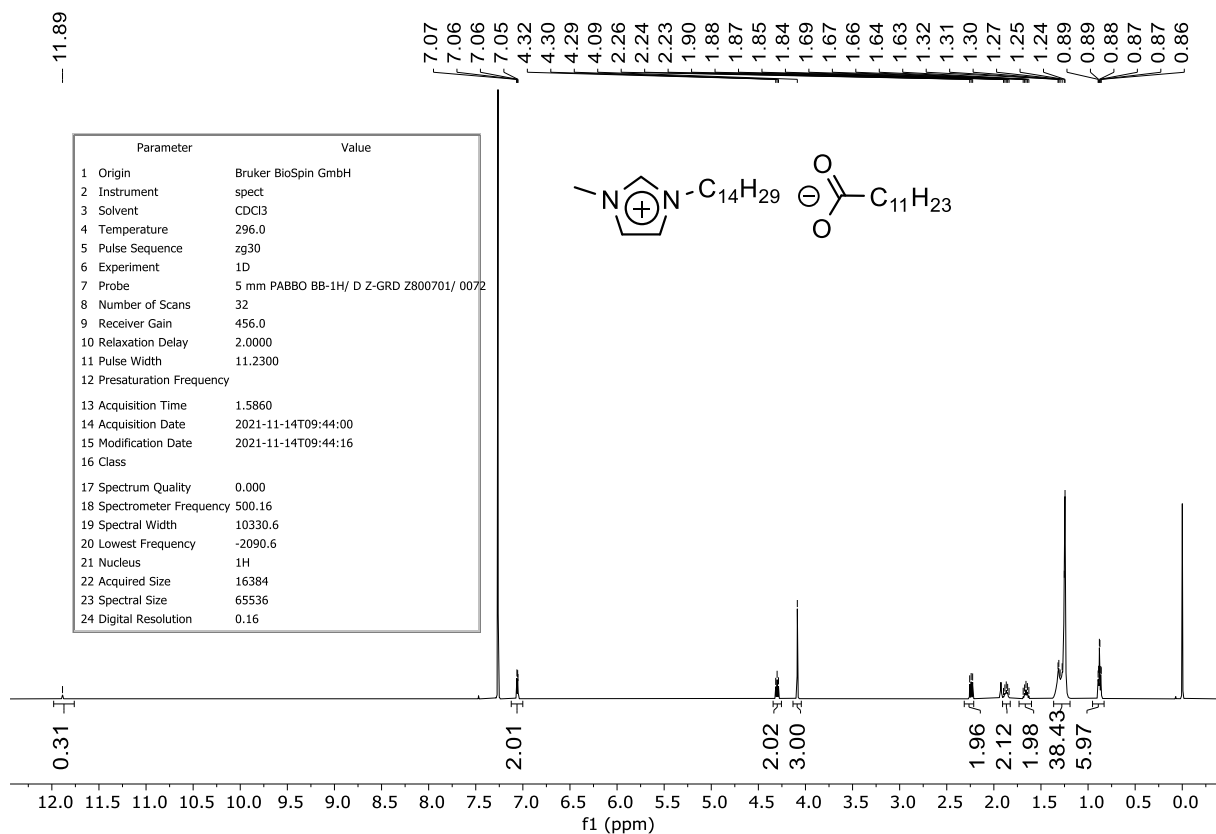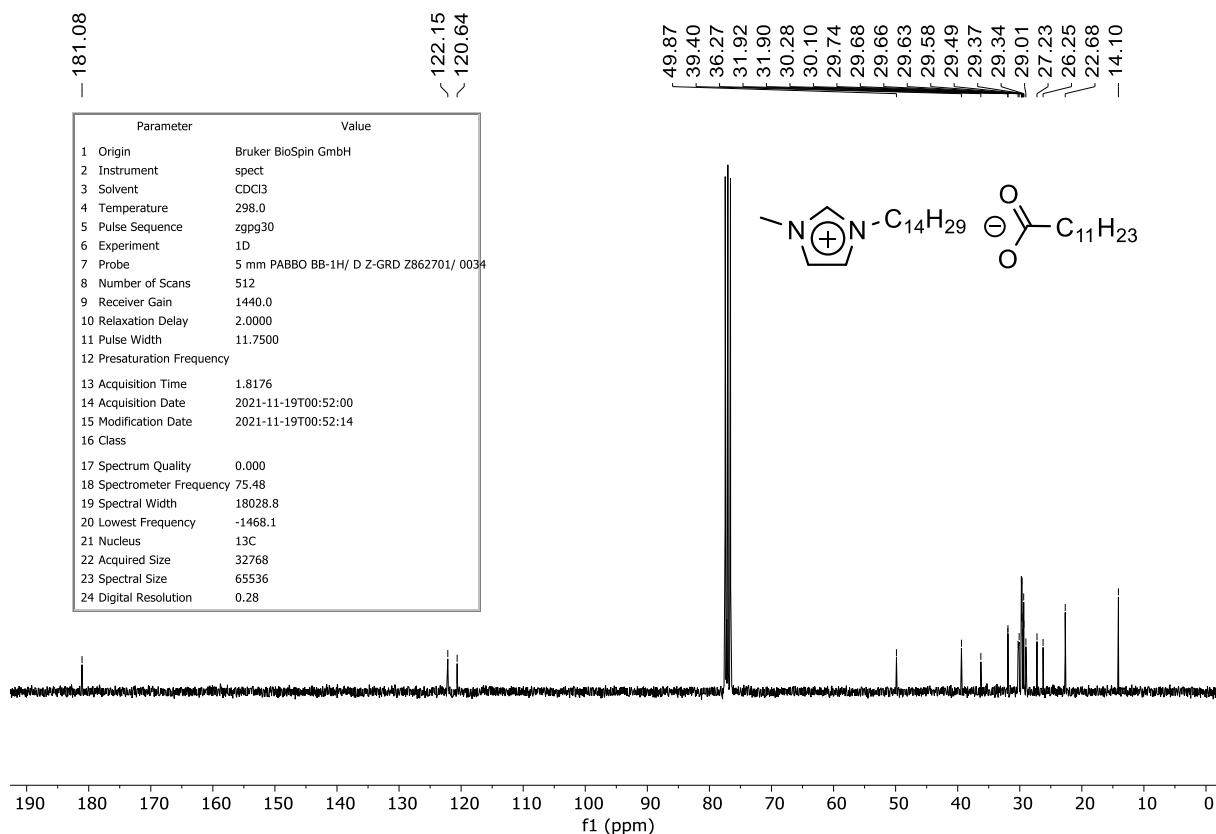

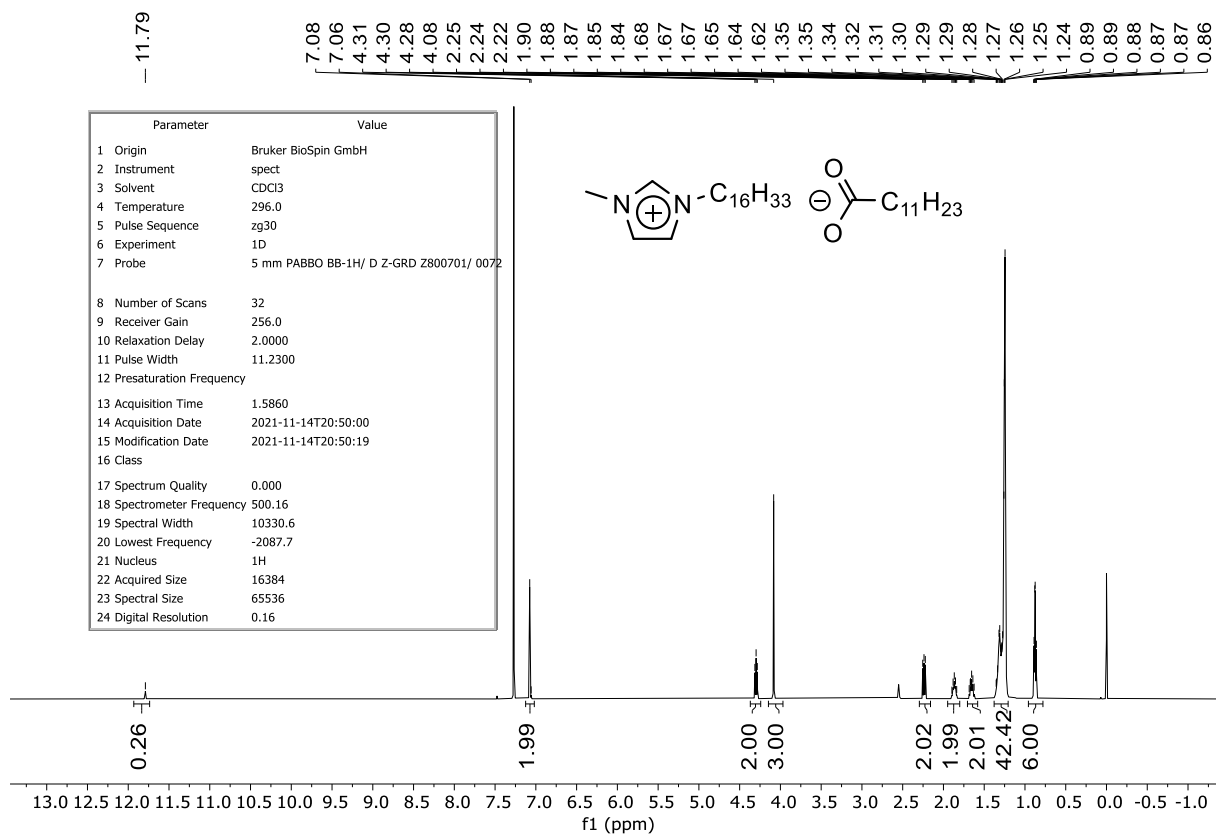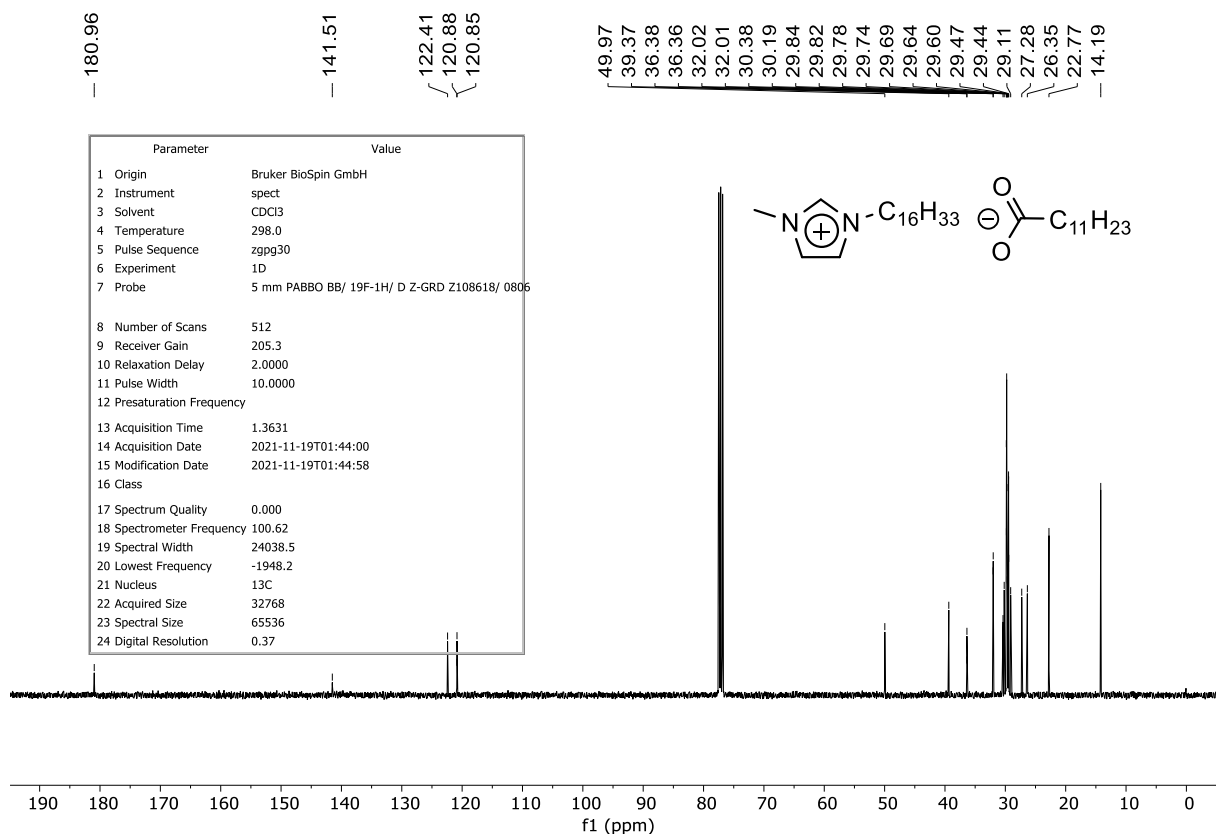

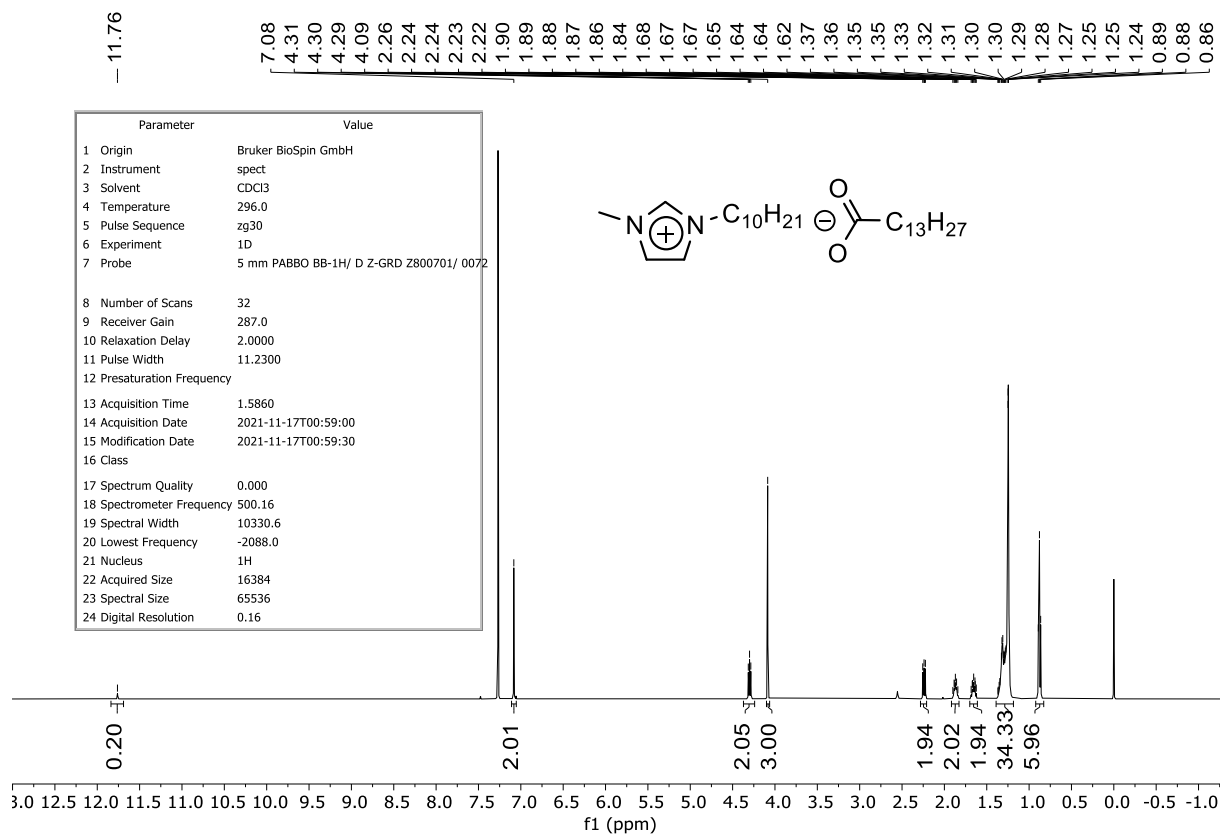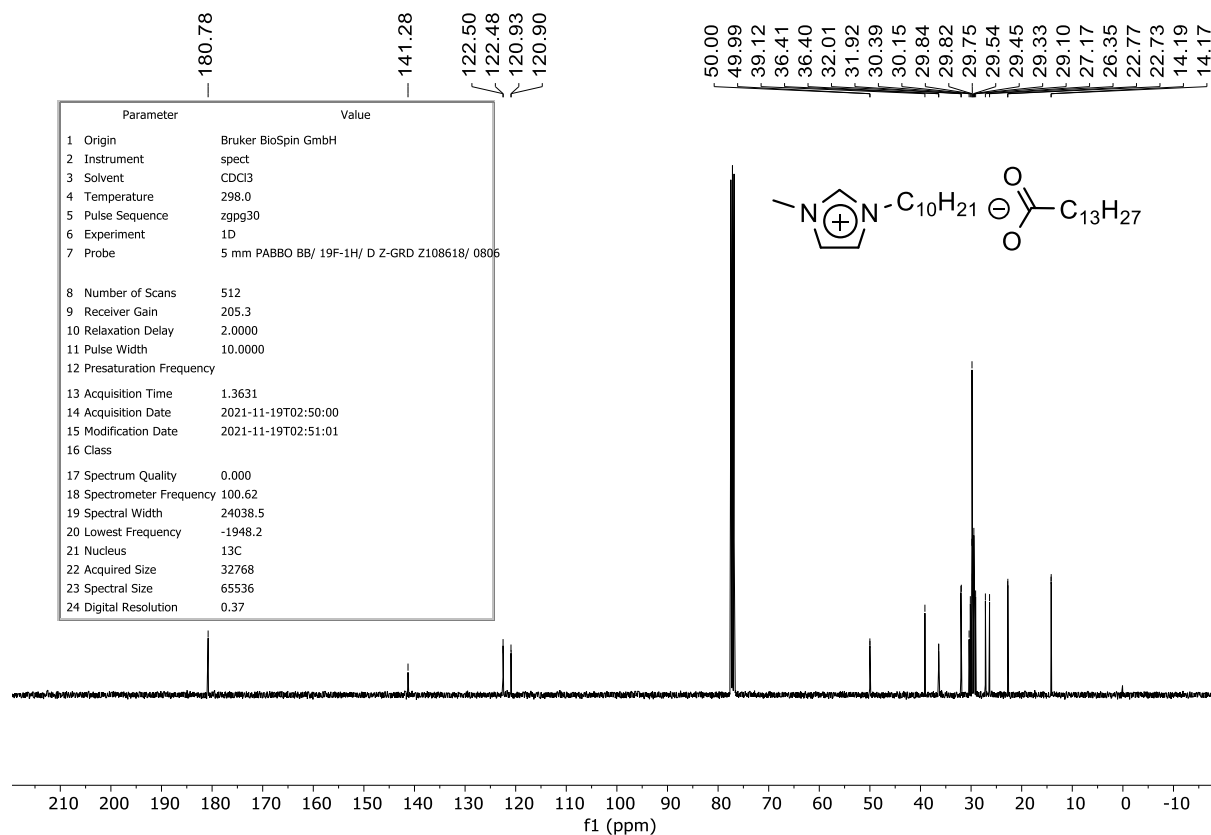

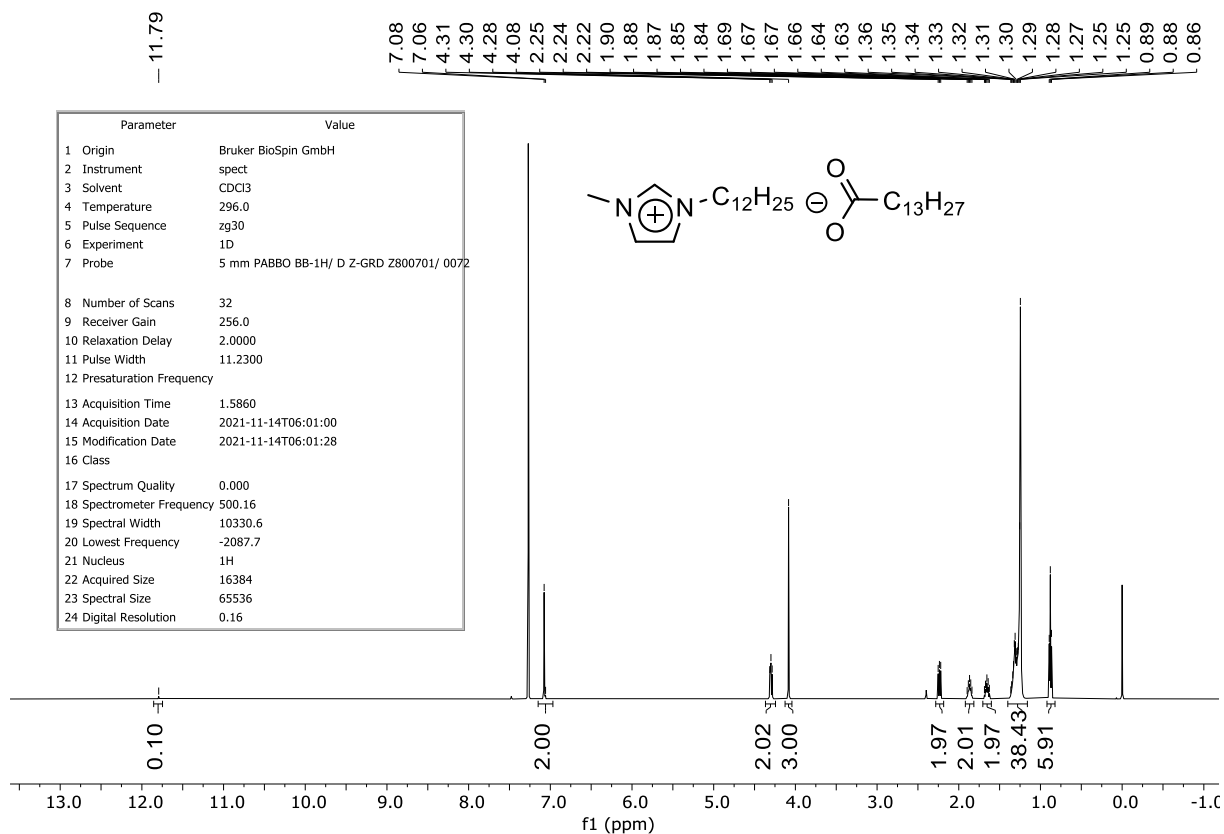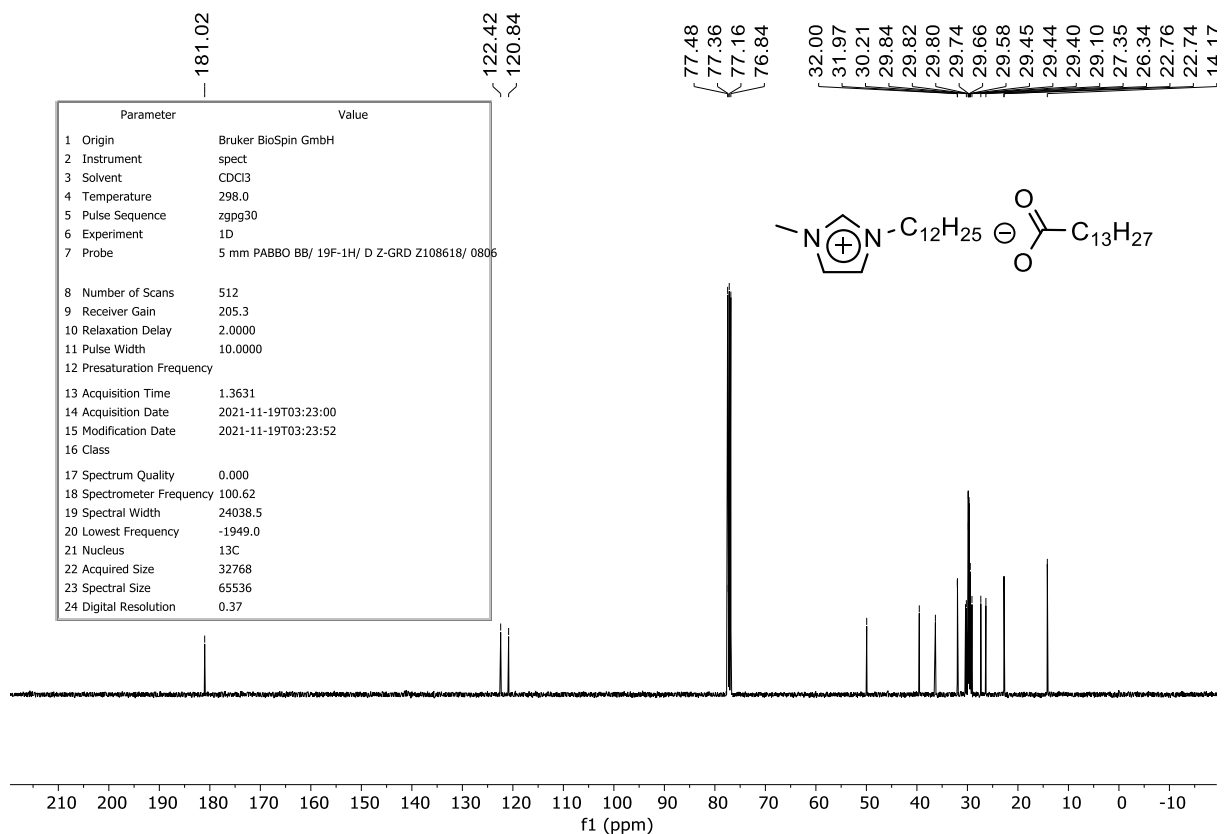

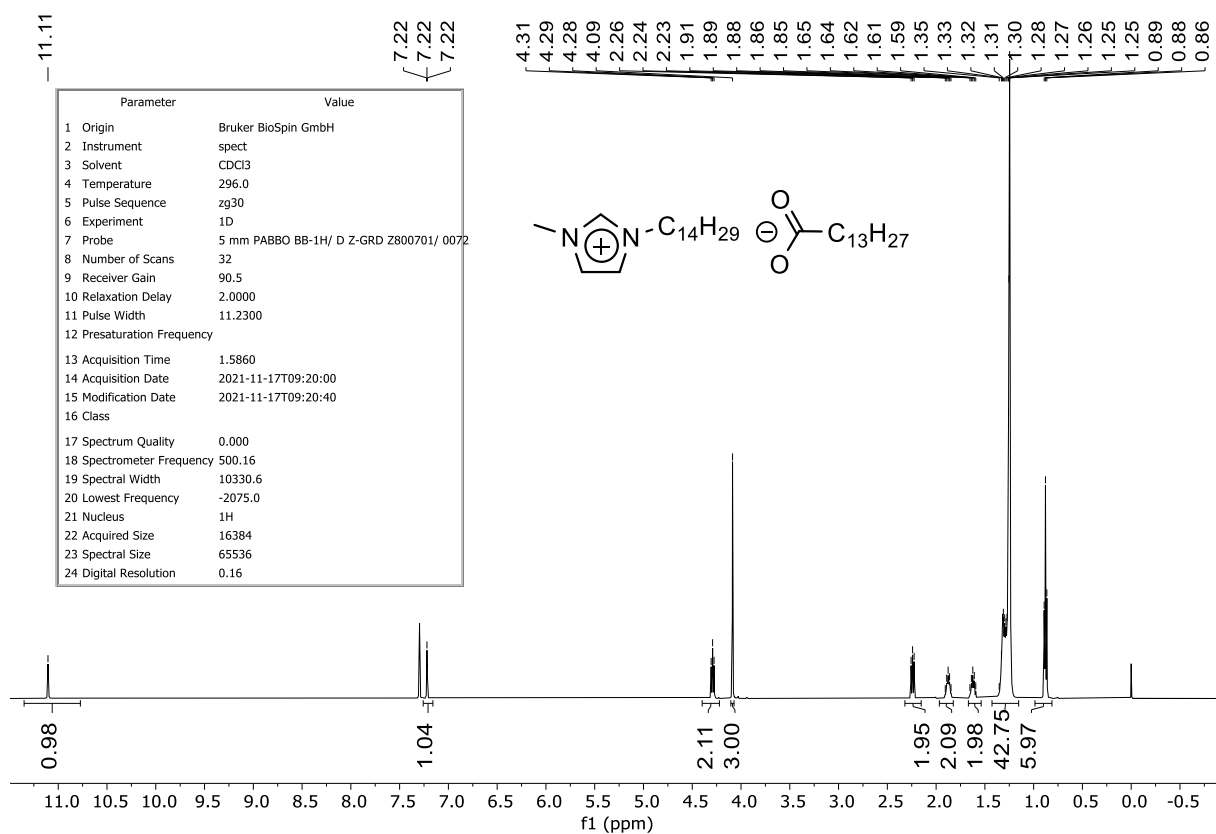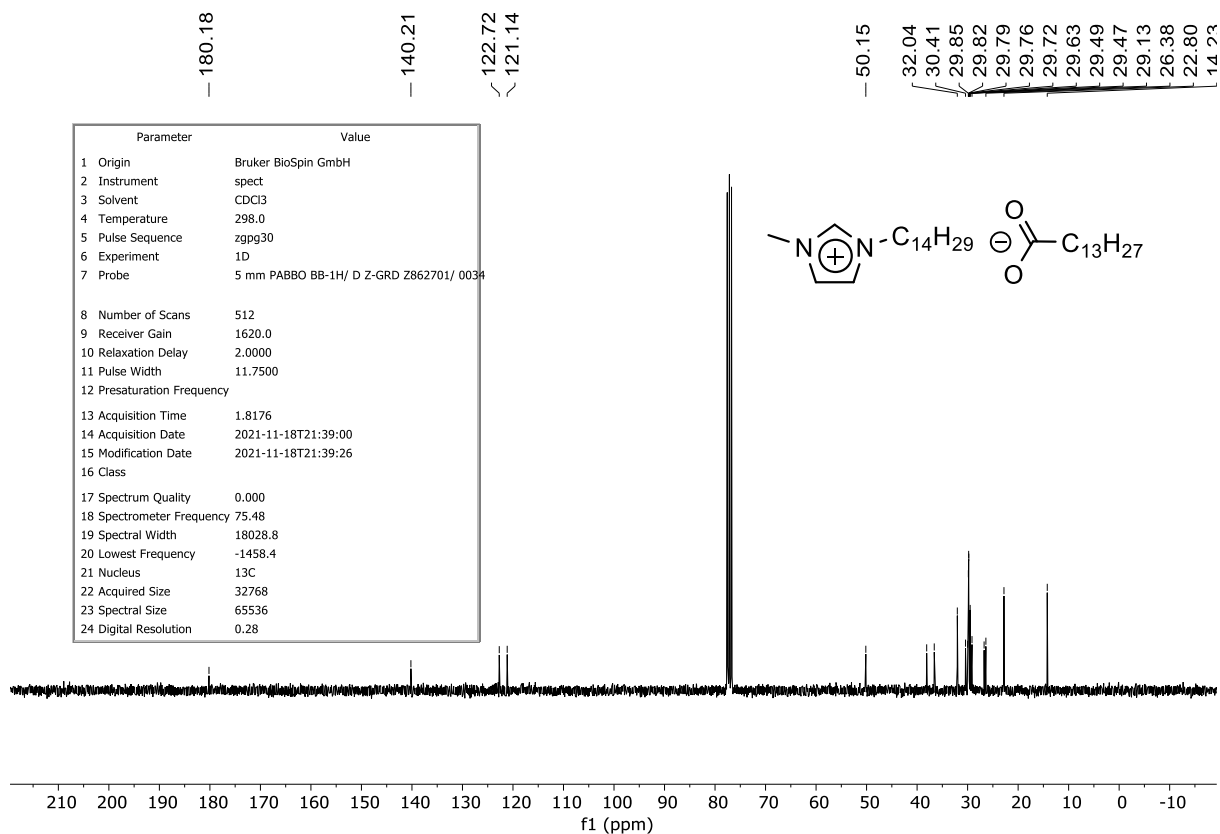

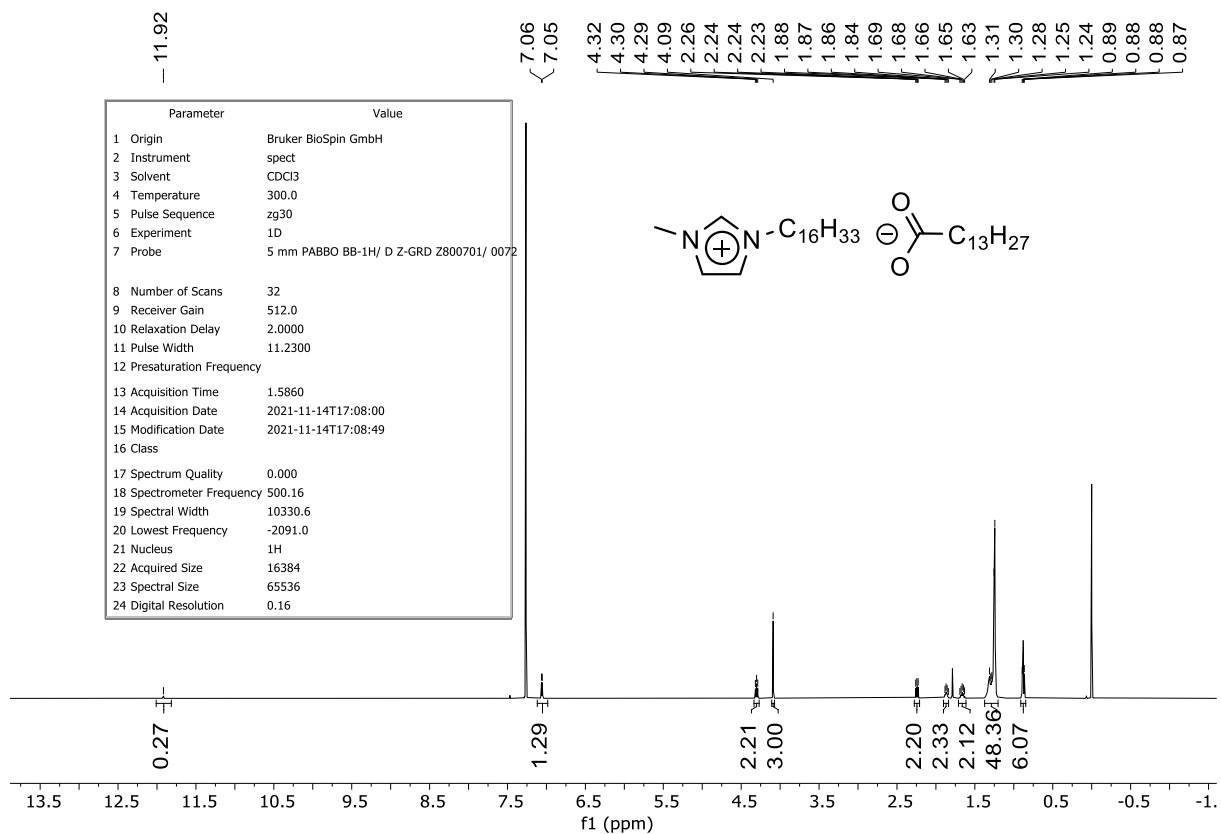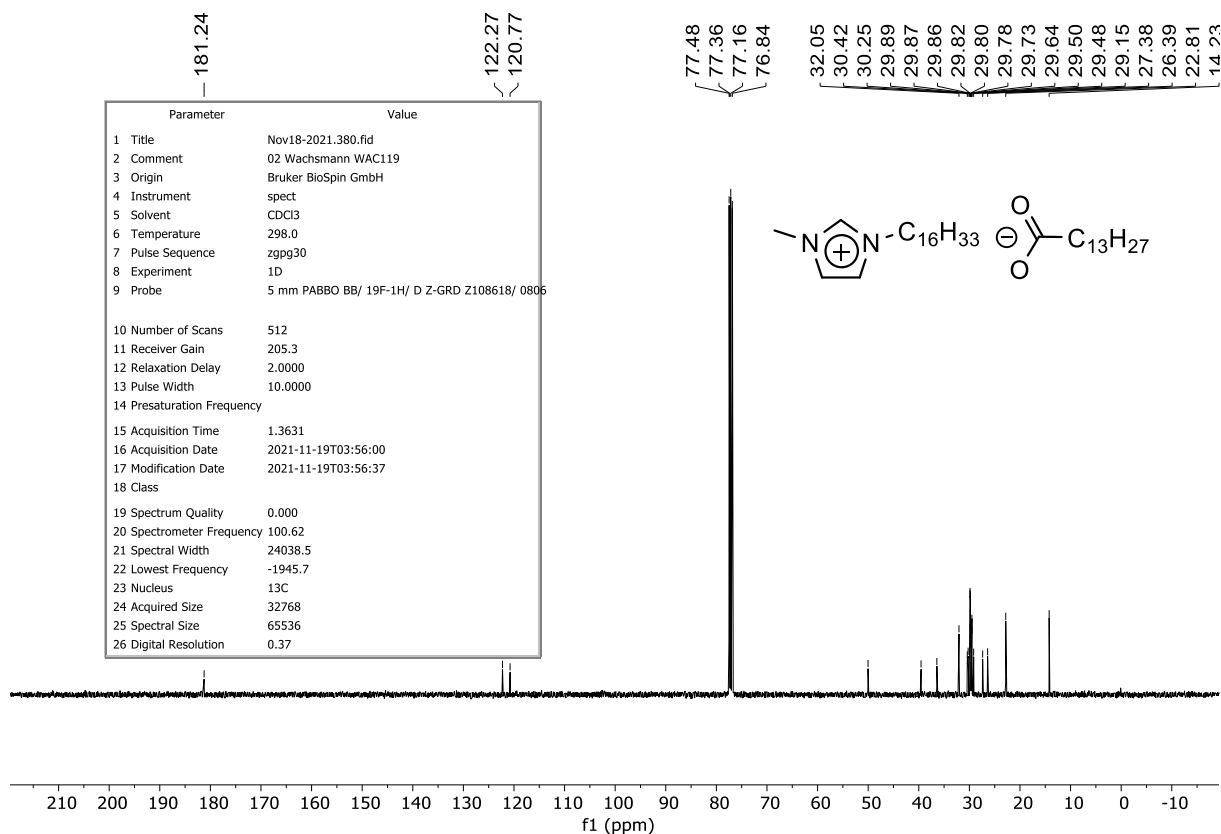

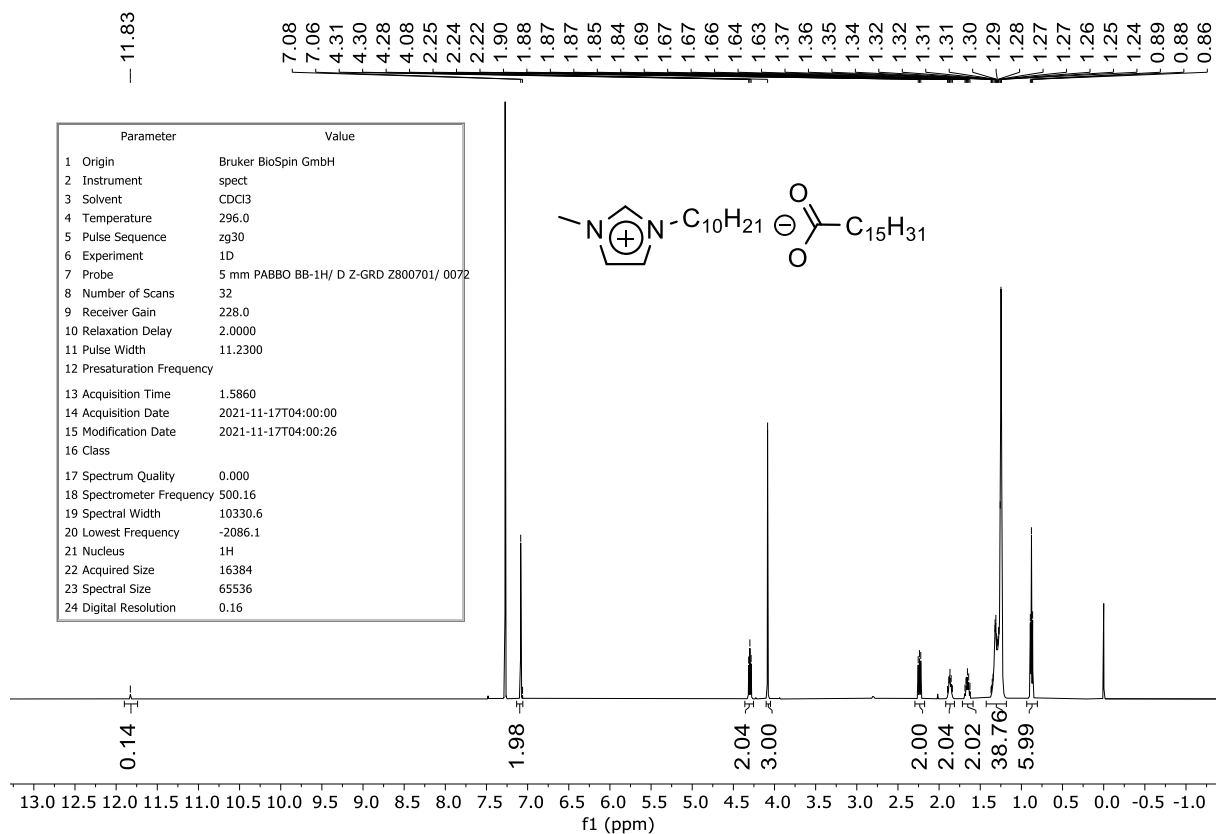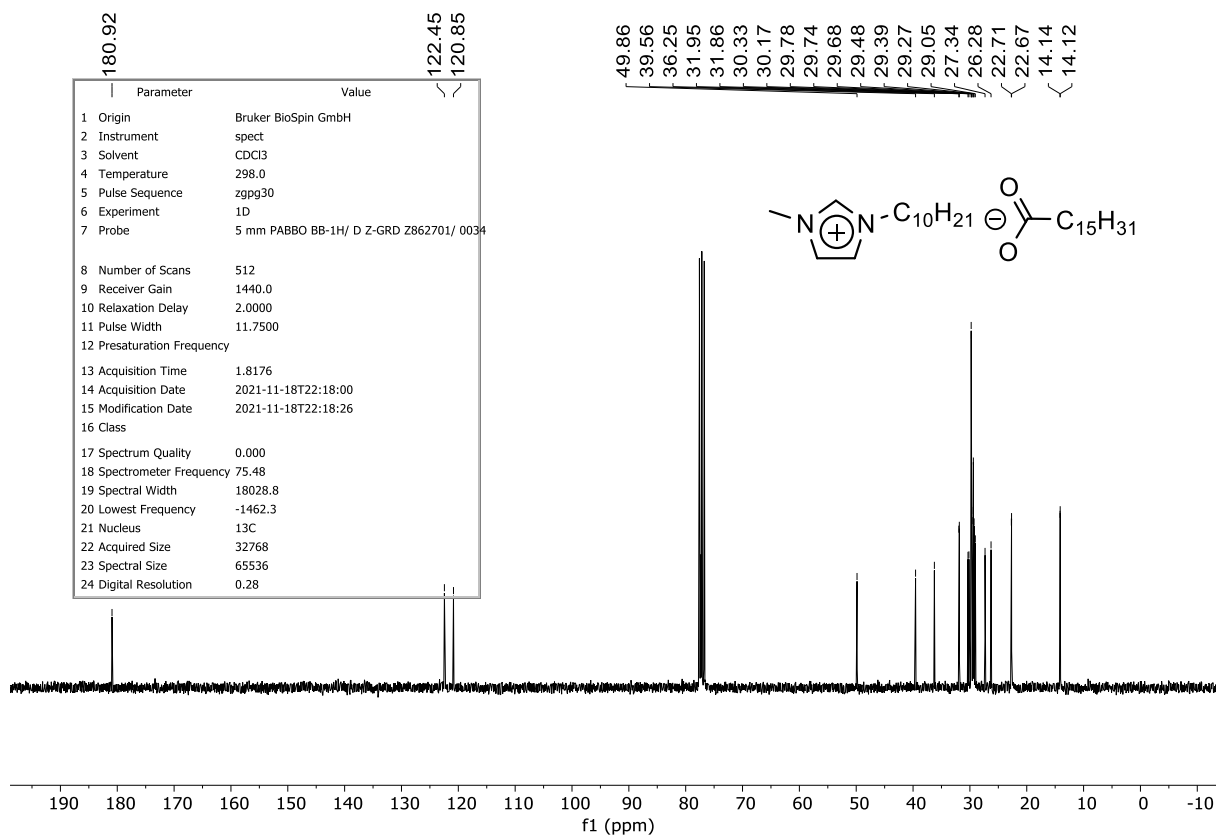

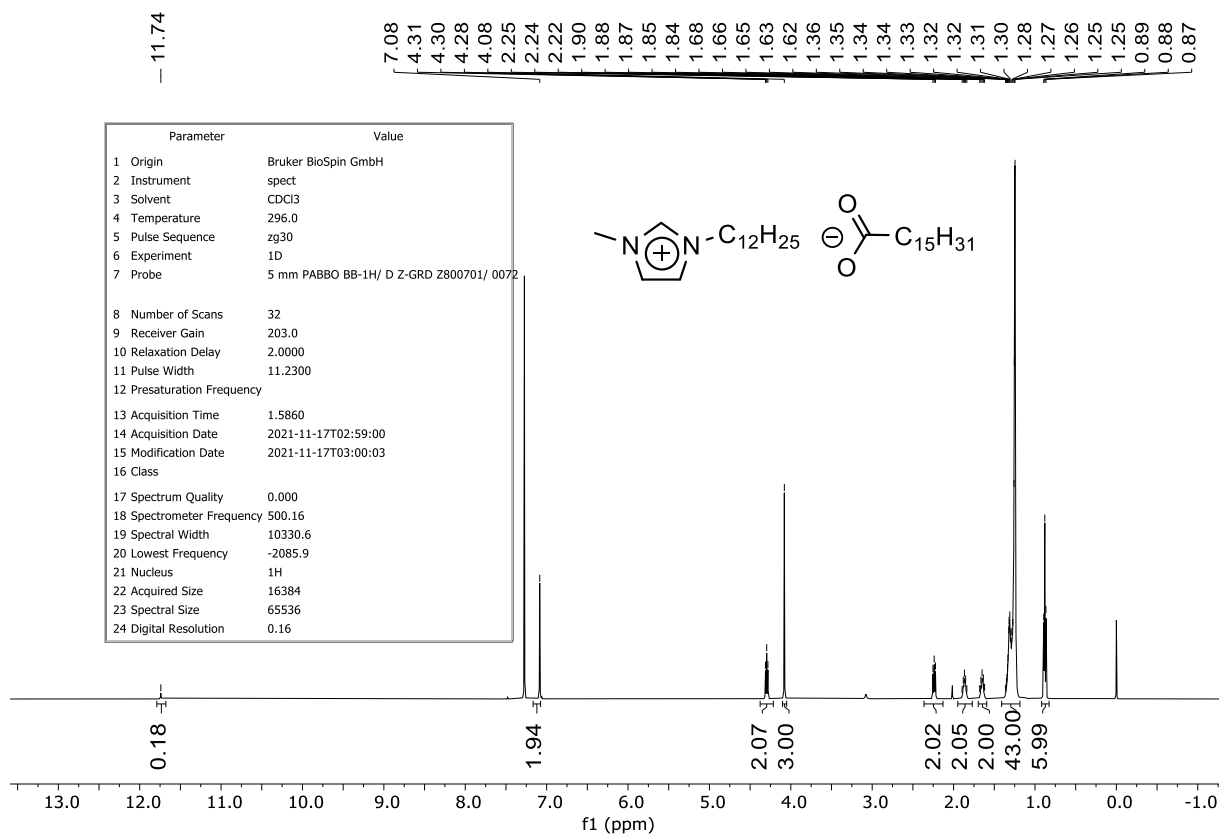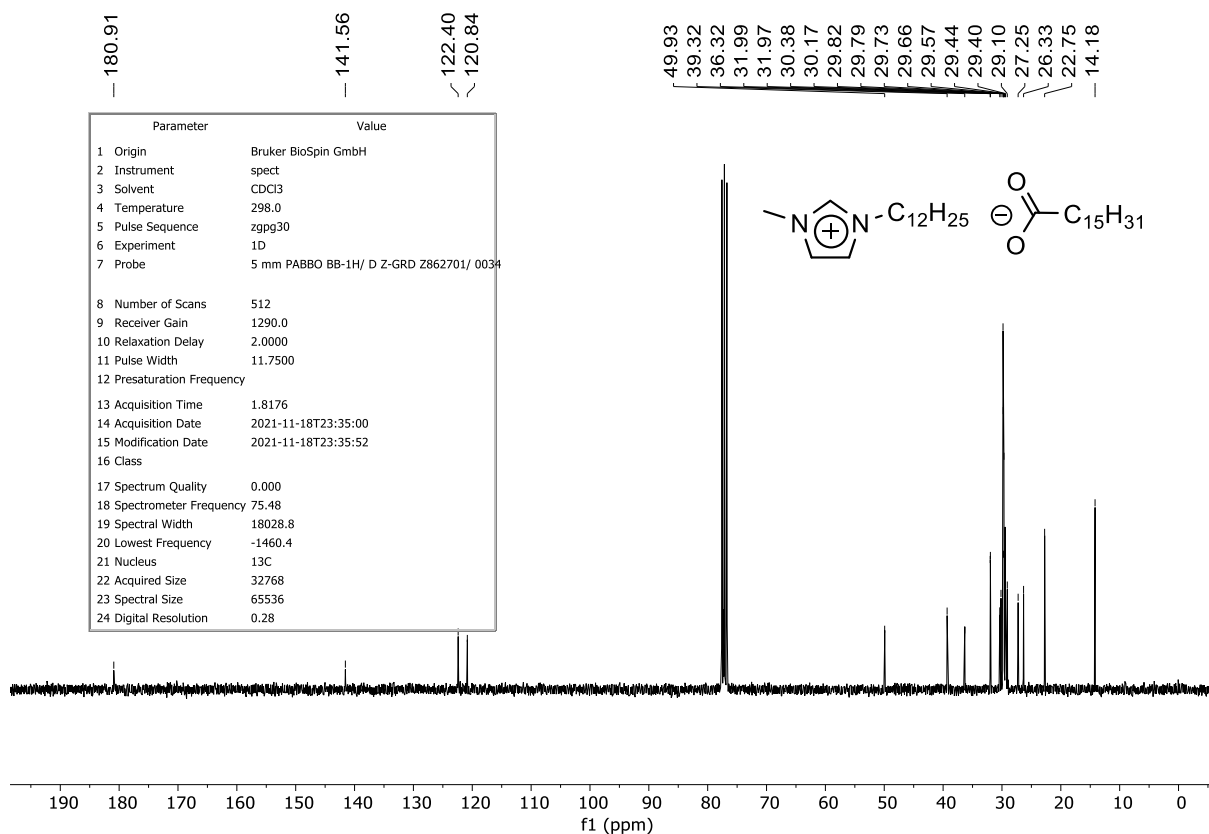

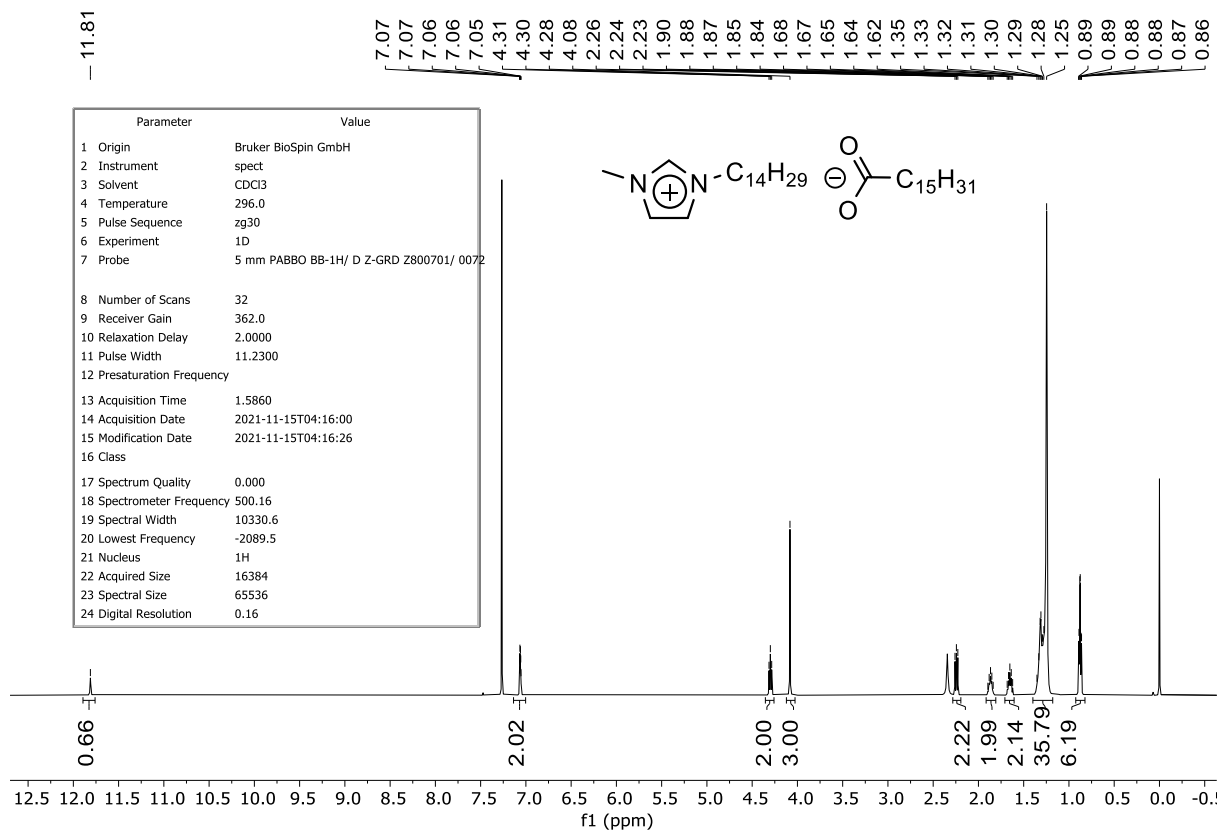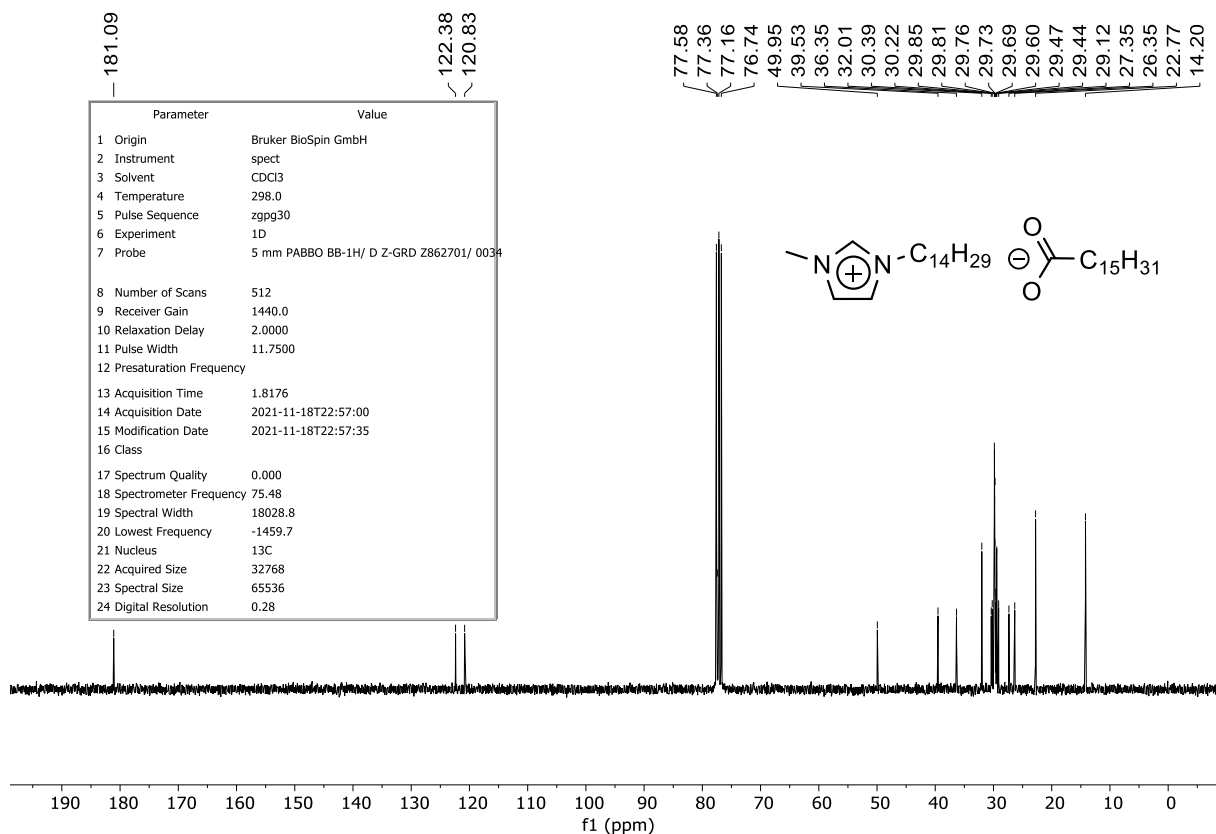

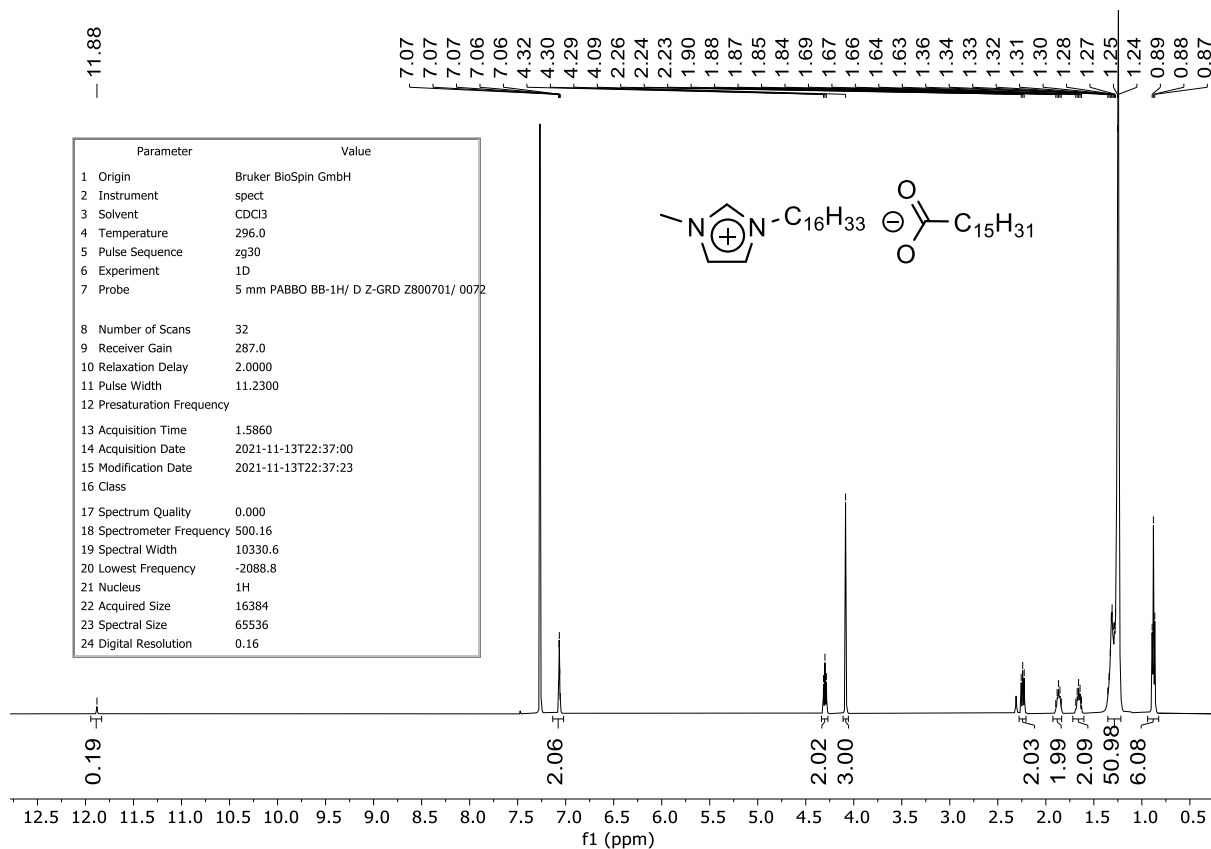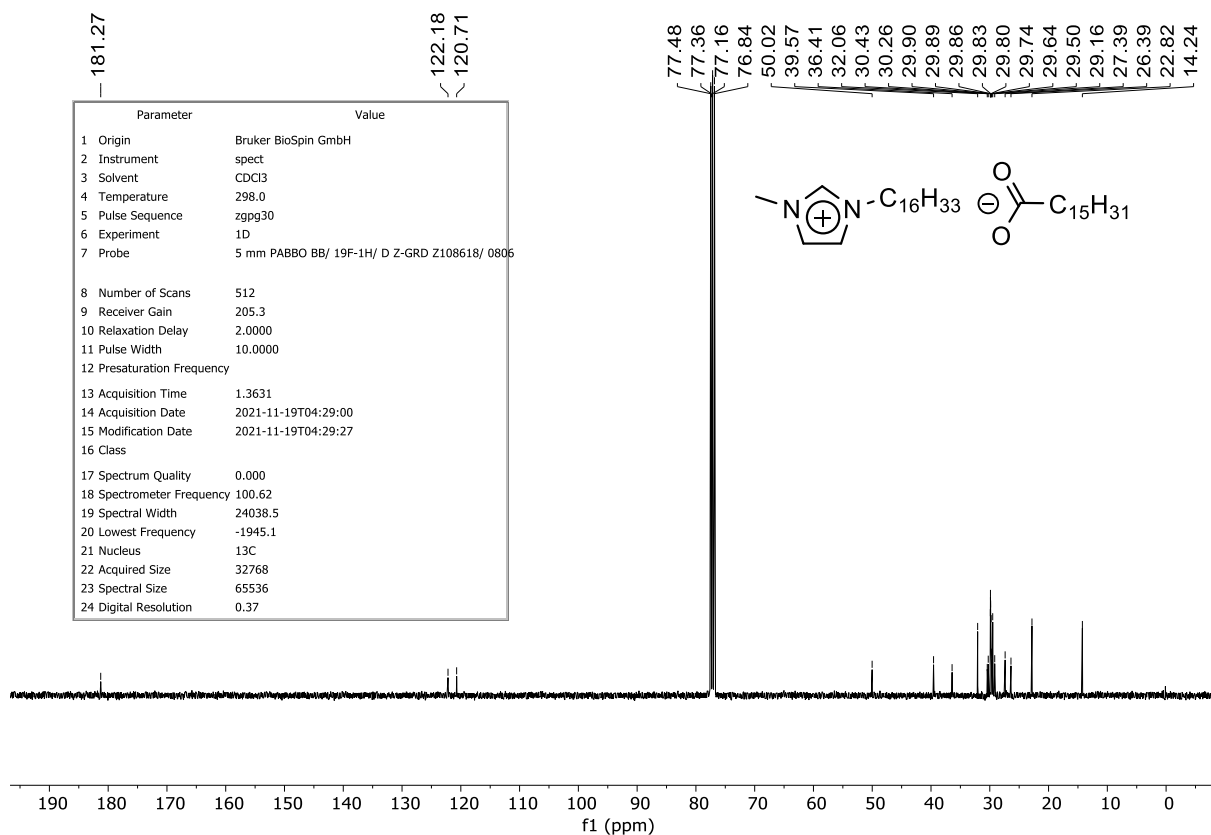

#### 4. DSC and mesophase analysis

**Table S1:** Phase transition temperatures i.e. melting temperatures  $T_m$  [°C], clearing temperatures  $T_{Cl}$  and corresponding enthalpies  $\Delta H$  [kJ/mol] of alkyylimidazolium carboxylates  $[C_n\text{mim}][C_{m-1}\text{COO}]$ . Values were taken out of the DSC curves of the first heating/cooling cycle due to degradation and additionally verified via POM. • was found in the DSC, \* was found via POM investigation; - not observed. The following phases were observed: Cr: crystallin; SmA: smectic A; I: isotropic;  $n$  = chain length of cation,  $m$  = chain length of anion.

| $n$ | $m$ | Cr | $T_m$ ( $\Delta H$ ) | SmA | $T_{Cl}$ ( $\Delta H$ ) | I | Cycle                |
|-----|-----|----|----------------------|-----|-------------------------|---|----------------------|
| 10  | 10  | •  | 61 (74.2)            | •   | 108 (2.9)               | • | 1 <sup>th</sup> heat |
|     |     | •  | 45 (38.7)            | •   | 105 (2.7)               | • | 1 <sup>th</sup> cool |
| 12  | 10  | •  | 43 (63.4)            | •   | 122 (3.5)               | • | 1 <sup>th</sup> heat |
|     |     | •  | 43 (50.7)            | •   | 98 (2.3)                | • | 1 <sup>th</sup> cool |
| 14  | 10  | •  | 47 (77.1)            | •   | 126 (3.2)               | • | 1 <sup>th</sup> heat |
|     |     | •  | 35 (31.4)            | •   | 128 (2.3)               | • | 1 <sup>th</sup> cool |
| 16  | 10  | •  | 55 (90.1)            | •   | 146 (3.6)               | • | 1 <sup>th</sup> heat |
|     |     | •  | 37 (85.6)            | •   | 145 (2.9)               | • | 1 <sup>th</sup> cool |
| 10  | 12  | •  | 42 (68.0)            | •   | 144 (3.7)               | • | 1 <sup>th</sup> heat |
|     |     | •  | 30 (53.6)            | •   | 139 (3.3)               | • | 1 <sup>th</sup> cool |
| 12  | 12  | •  | 48 (79.6)            | •   | 118 (3.0)               | • | 1 <sup>th</sup> heat |
|     |     | •  | 59 (20.0)            | •   | 102 (1.9)               | • | 1 <sup>th</sup> cool |
| 14  | 12  | •  | 57 (78.5)            | •   | 139 (2.7)               | • | 1 <sup>th</sup> heat |
|     |     | •  | 54 (34.1)            | •   | 123 (1.8)               | • | 1 <sup>th</sup> cool |
| 16  | 12  | •  | 55 (76.6)            | •   | 126 (2.3)               | • | 1 <sup>th</sup> heat |
|     |     | •  | 52 (40.1)            | •   | 96 (1.6)                | • | 1 <sup>th</sup> cool |
| 10  | 14  | •  | 37 (58.1)            | •   | 132 (0.3)               | • | 1 <sup>th</sup> heat |
|     |     | •  | 35 (15.6)            | •   | 129 (2.3)               | • | 1 <sup>th</sup> cool |
| 12  | 14  | •  | 59 (145.7)           | •   | 127 (5.2)               | • | 1 <sup>th</sup> heat |
|     |     | •  | 35 (49.4)            | •   | 123 (4.4)               | • | 1 <sup>th</sup> cool |
| 14  | 14  | •  | 70 (75.9)            | *   | 120* (-)                | * | 1 <sup>th</sup> heat |
|     |     | *  | 64 (-)               | *   | 115* (-)                | * | 1 <sup>th</sup> cool |
| 16  | 14  | •  | 58 (89.2)            | •   | 150 (2.1)               | • | 1 <sup>th</sup> heat |
|     |     | •  | 46 (40.0)            | •   | 143 (1.5)               | • | 1 <sup>th</sup> cool |
| 10  | 16  | •  | 45 (75.7)            | •   | 128 (2.6)               | • | 1 <sup>th</sup> heat |
|     |     | •  | 46 (45.9)            | •   | 99 (1.7)                | • | 1 <sup>th</sup> cool |
| 12  | 16  | •  | 52 (98.9)            | •   | 138 (3.3)               | • | 1 <sup>th</sup> heat |
|     |     | •  | 56 (26.7)            | •   | 129 (2.1)               | • | 1 <sup>th</sup> cool |
| 14  | 16  | •  | 64 (103.6)           | •   | 150 (4.0)               | • | 1 <sup>th</sup> heat |
|     |     | •  | 43 (37.0)            | •   | 148 (1.9)               | • | 1 <sup>th</sup> cool |
| 16  | 16  | •  | 79 (73.8)            | •   | 133 (1.4)               | • | 1 <sup>th</sup> heat |
|     |     | •  | 78 (33.8)            | •   | 126 (1.2)               | • | 1 <sup>th</sup> cool |

<sup>a</sup> Additional Cr–Cr transitions were observed for  $[C_{14}\text{mim}][C_9\text{COO}]$  at 37 °C 1<sup>th</sup> cooling (7.2 kJ/mol),  $[C_{16}\text{mim}][C_{11}\text{COO}]$  at 63 °C 1<sup>th</sup> cooling (14.2 kJ/mol),  $[C_{14}\text{mim}][C_{11}\text{COO}]$  at 60 °C 1<sup>th</sup> cooling (11.8 kJ/mol),  $[C_{12}\text{mim}][C_{13}\text{COO}]$  at 56 °C 1<sup>th</sup> cooling (50.7 kJ/mol),  $[C_{16}\text{mim}][C_{13}\text{COO}]$  at 60 °C 1<sup>th</sup> cooling (10.1 kJ/mol), 65 °C 1<sup>th</sup> cooling (14.5 kJ/mol) and  $[C_{14}\text{mim}][C_{15}\text{COO}]$  at 65 °C 1<sup>th</sup> cooling (28.6 kJ/mol), at 74 °C 1<sup>th</sup> cooling (1.5 kJ/mol).

**Table S2:** Phase transition temperatures i.e. melting temperatures  $T_m$  [°C], clearing temperatures  $T_{CI}$  [°C] and corresponding enthalpies  $\Delta H$  [kJ/mol] of alkylimidazolium derivatives [**C<sub>n</sub>mim**]. Values were taken out of the DSC curves of the first heating/cooling cycle due to degradation and additionally verified via POM. • was found in the DSC; - not observed. The following phases were observed: Cr: crystallin; I: isotropic. The mesophase was not further investigated.

| Compound                     | Cr | $T_m$ ( $\Delta H$ ) | Mesophase | $T_{CI}$ ( $\Delta H$ ) | I | Cycle                |
|------------------------------|----|----------------------|-----------|-------------------------|---|----------------------|
| <b>[C<sub>10</sub>mim]Br</b> | •  | 17 (1.0)             | -         | -                       | • | 1 <sup>th</sup> heat |
|                              | •  | -3 (0.1)             | -         | -                       | • | 1 <sup>th</sup> cool |
| <b>[C<sub>12</sub>mim]Br</b> | •  | 45 (46.2)            | •         | 130 (0.5)               | • | 1 <sup>th</sup> heat |
|                              | •  | 13 (32.5)            | •         | 129 (0.5)               | • | 1 <sup>th</sup> cool |
| <b>[C<sub>14</sub>mim]Br</b> | •  | 55 (53.5)            | •         | 180 (1.2)               | • | 1 <sup>th</sup> heat |
|                              | •  | 20 (56.9)            | •         | 174 (1.0)               | • | 1 <sup>th</sup> cool |
| <b>[C<sub>16</sub>mim]Br</b> | •  | 54 (60.2)            | •         | 223 (1.3)               | • | 1 <sup>th</sup> heat |
|                              | •  | 39 (19.1)            | •         | 205 (1.2)               | • | 1 <sup>th</sup> cool |

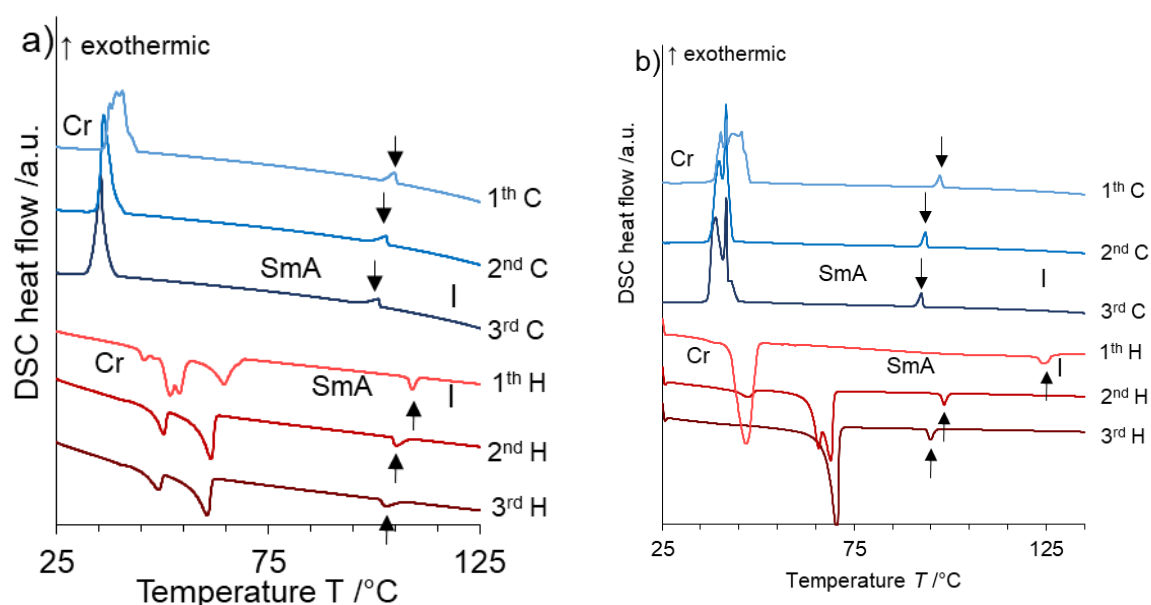

**Figure S1:** DSC-curves of a) **[C<sub>10</sub>mim][C<sub>9</sub>COO]** and b) **[C<sub>12</sub>mim][C<sub>9</sub>COO]**. Cr: crystallin; SmA: smectic A; I: isotropic. H/C: Heating/Cooling (rate 5 K/min).

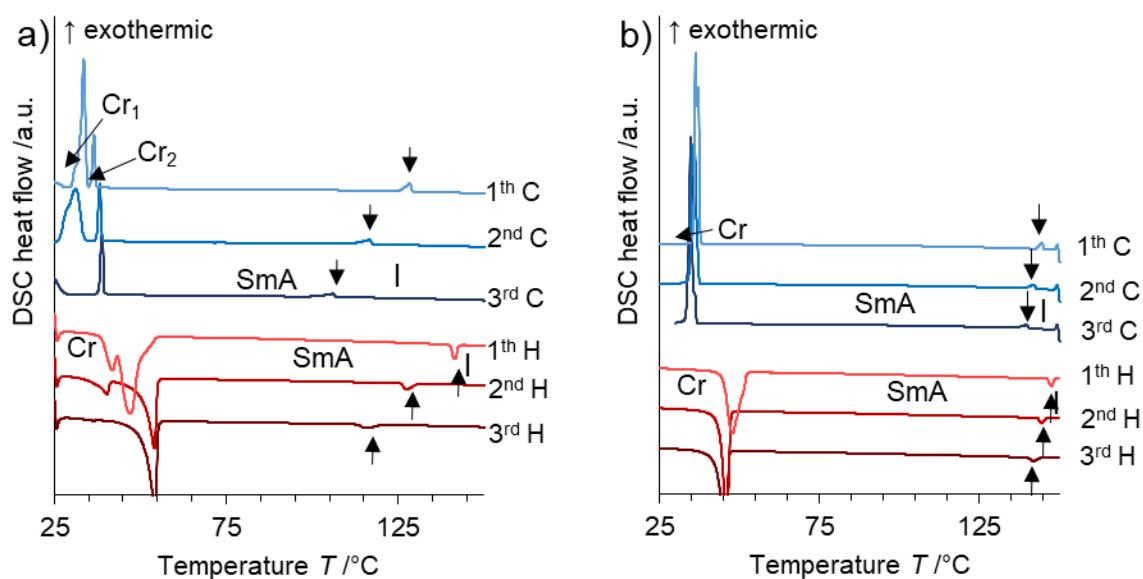

**Figure S2:** DSC-curves of a)  $[C_{14}mim][C_9COO]$  and b)  $[C_{16}mim][C_9COO]$ . Cr: crystallin; SmA: smectic A; I: isotropic. H/C: Heating/Cooling (rate 5 K/min).

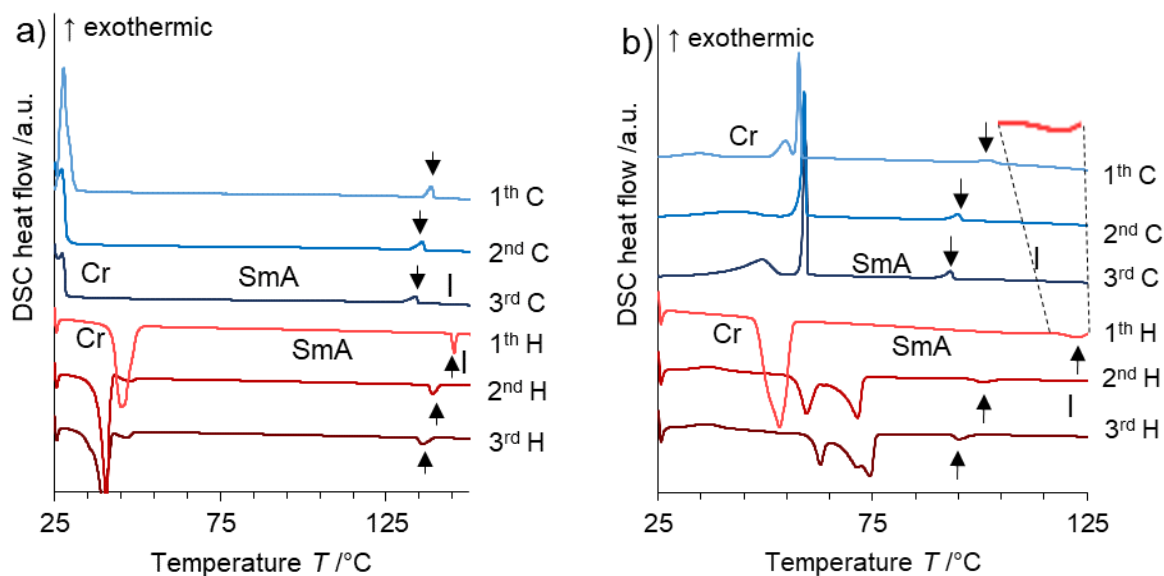

**Figure S3:** DSC-curves of a)  $[C_{10}mim][C_{11}COO]$  and b)  $[C_{12}mim][C_{11}COO]$ . Cr: crystallin; SmA: smectic A; I: isotropic. H/C: Heating/Cooling (rate 5 K/min).

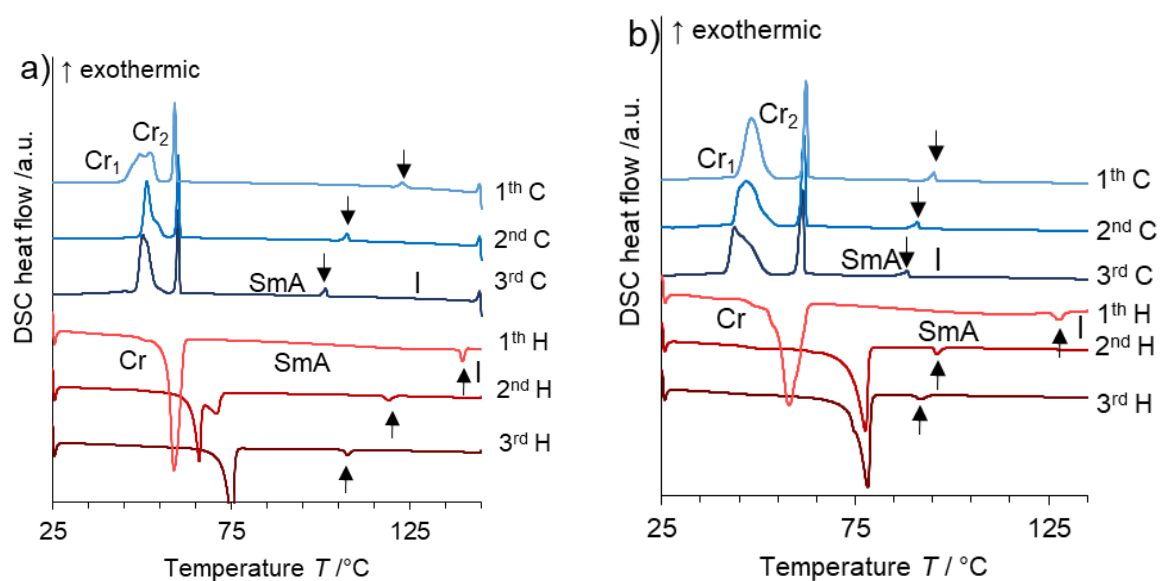

**Figure S4:** DSC-curves of a)  $[C_{14}mim][C_{11}COO]$  b)  $[C_{16}mim][C_{11}COO]$ . Cr: crystallin; SmA: smectic A; I: isotropic. H/C: Heating/Cooling (rate 5 K/min).

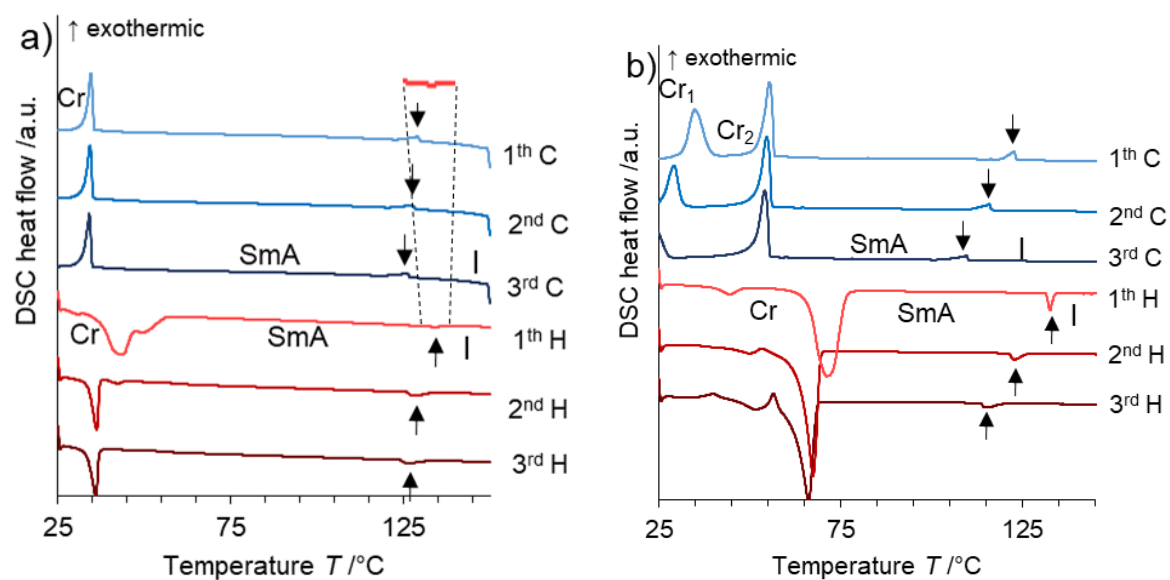

**Figure S5:** DSC-curves of a)  $[C_{10}mim][C_{13}COO]$  and b)  $[C_{12}mim][C_{13}COO]$ . Cr: crystallin; SmA: smectic A; I: isotropic. H/C: Heating/Cooling (rate 5 K/min).

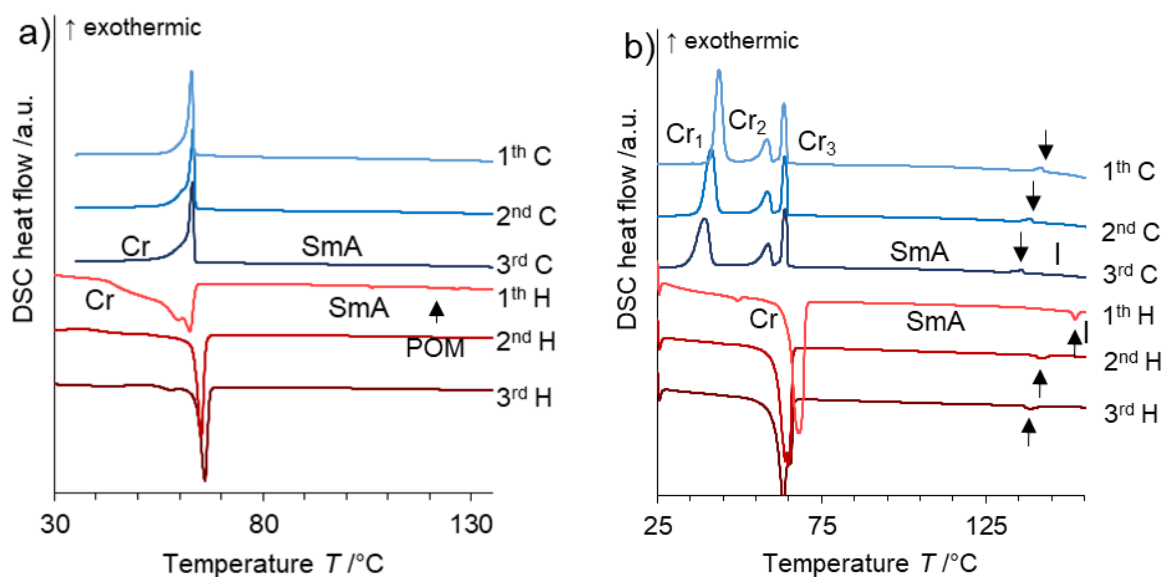

**Figure S6:** DSC-curves of a)  $[C_{14}mim][C_{13}COO]$  and b)  $[C_{16}mim][C_{13}COO]$ . Cr: crystallin; SmA: smectic A; I: isotropic. H/C: Heating/Cooling (rate 5 K/min).

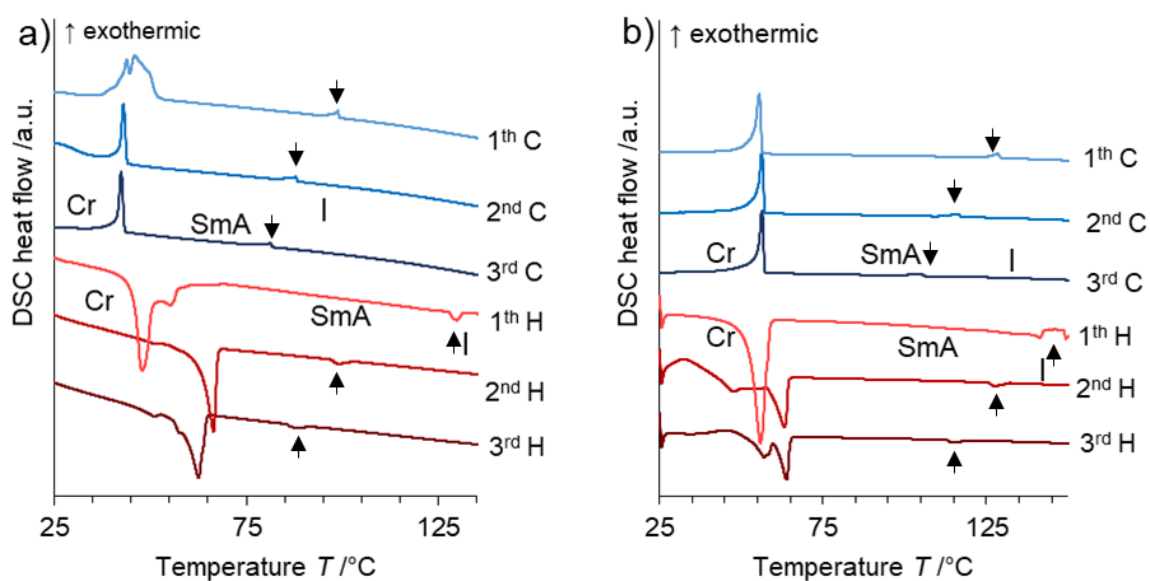

**Figure S7:** DSC-curves of a)  $[C_{10}mim][C_{15}COO]$  and b)  $[C_{12}mim][C_{15}COO]$ . Cr: crystallin; SmA: smectic A; I: isotropic. H/C: Heating/Cooling (rate 5 K/min).

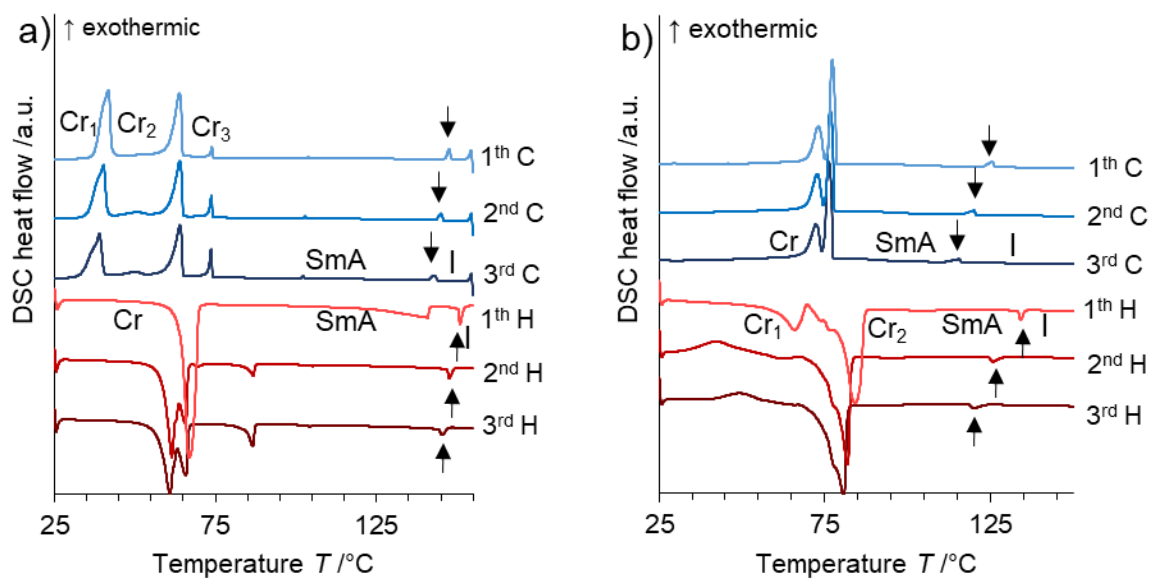

**Figure S8:** DSC-curves of a)  $[C_{14}mim][C_{15}COO]$  and b)  $[C_{16}mim][C_{15}COO]$ . Cr: crystallin; SmA: smectic A; I: isotropic. H/C: Heating/Cooling (rate 5 K/min).

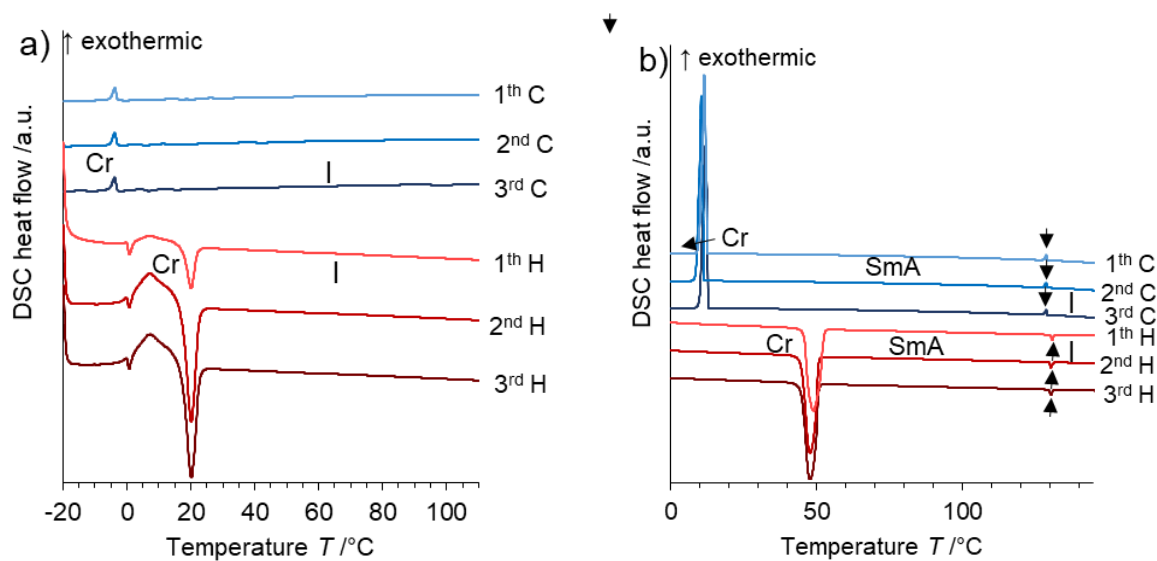

**Figure S9:** DSC-curves of a)  $[C_{10}mim]$  and b)  $[C_{12}mim]$ . Cr: crystallin; SmA: smectic A; I: isotropic. H/C: Heating/Cooling (rate 5 K/min).

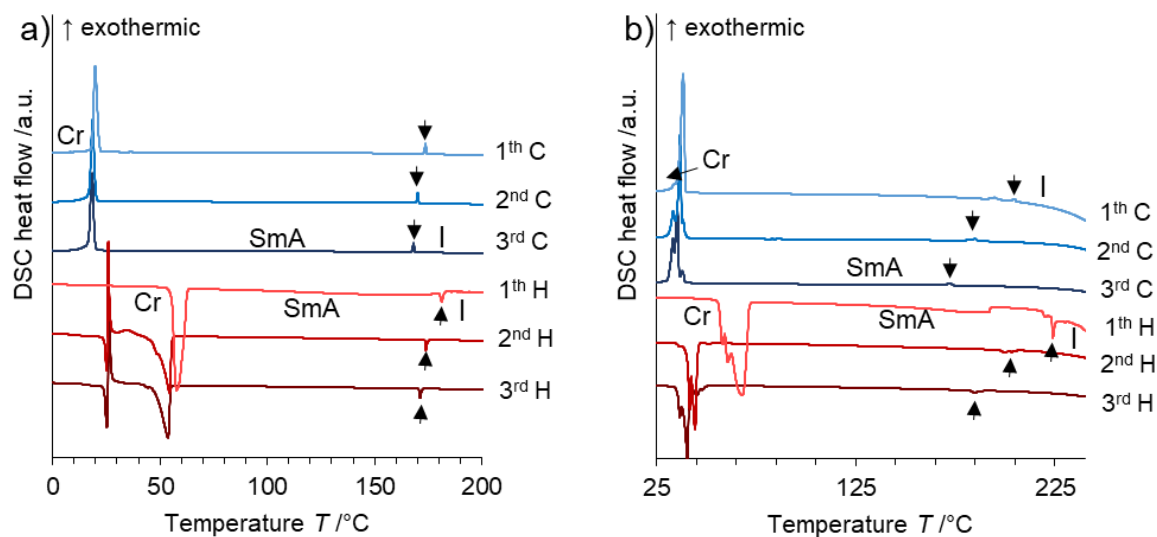

**Figure S10:** DSC-curves of a)  $[C_{14}mim]$  and b)  $[C_{16}mim]$ . Cr: crystalline; SmA: smectic A; I: isotropic. H/C: Heating/Cooling (rate 5 K/min).

## 5. Polarization microscopy studies

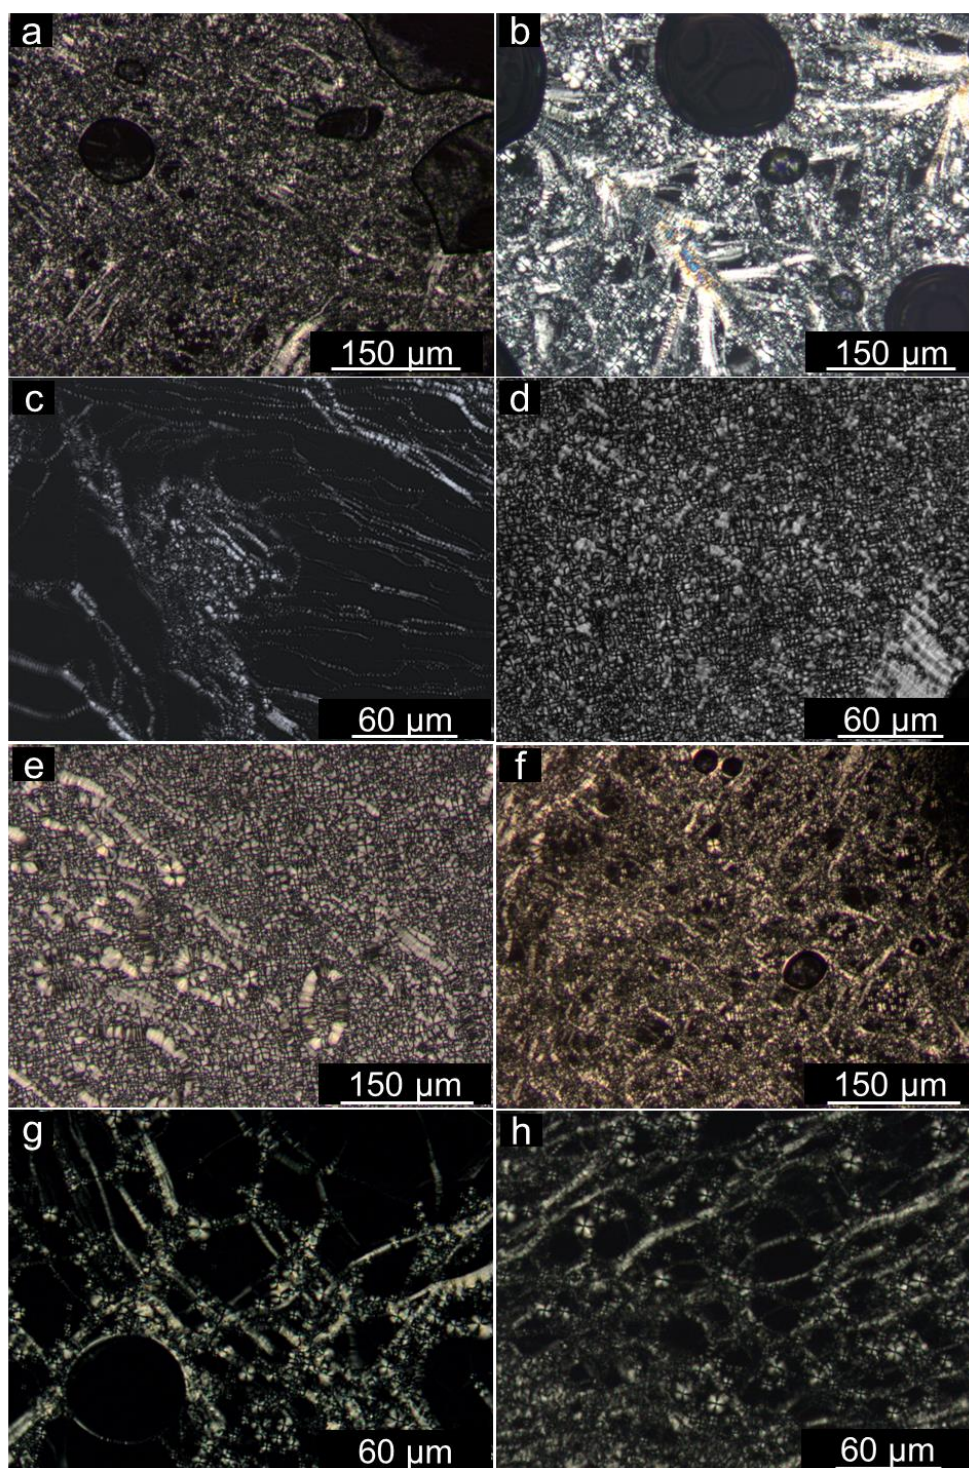

**Figure S11:** POM textures as seen between crossed polarizers upon cooling from the isotropic liquid (cooling rate 2K/min) of imidazolium carboxylates  $[\text{C}_n\text{mim}][\text{C}_m\text{-1COO}]$ . a)  $[\text{C}_{10}\text{mim}][\text{C}_9\text{COO}]$  temp. 100 °C, magnification 100x, b)  $[\text{C}_{12}\text{mim}][\text{C}_9\text{COO}]$  temp. 110 °C, magnification 100x, c)  $[\text{C}_{14}\text{mim}][\text{C}_9\text{COO}]$  temp. 110 °C, magnification 200x, d)  $[\text{C}_{16}\text{mim}][\text{C}_9\text{COO}]$  temp. 90 °C, magnification 200x, e)  $[\text{C}_{10}\text{mim}][\text{C}_{11}\text{COO}]$  temp. 100 °C, magnification 100x, f)  $[\text{C}_{12}\text{mim}][\text{C}_{11}\text{COO}]$  temp. 100 °C, magnification 100x, g)  $[\text{C}_{14}\text{mim}][\text{C}_{11}\text{COO}]$  temp. 110 °C, magnification 200x, h)  $[\text{C}_{16}\text{mim}][\text{C}_{11}\text{COO}]$  temp. 120 °C, magnification 100x.

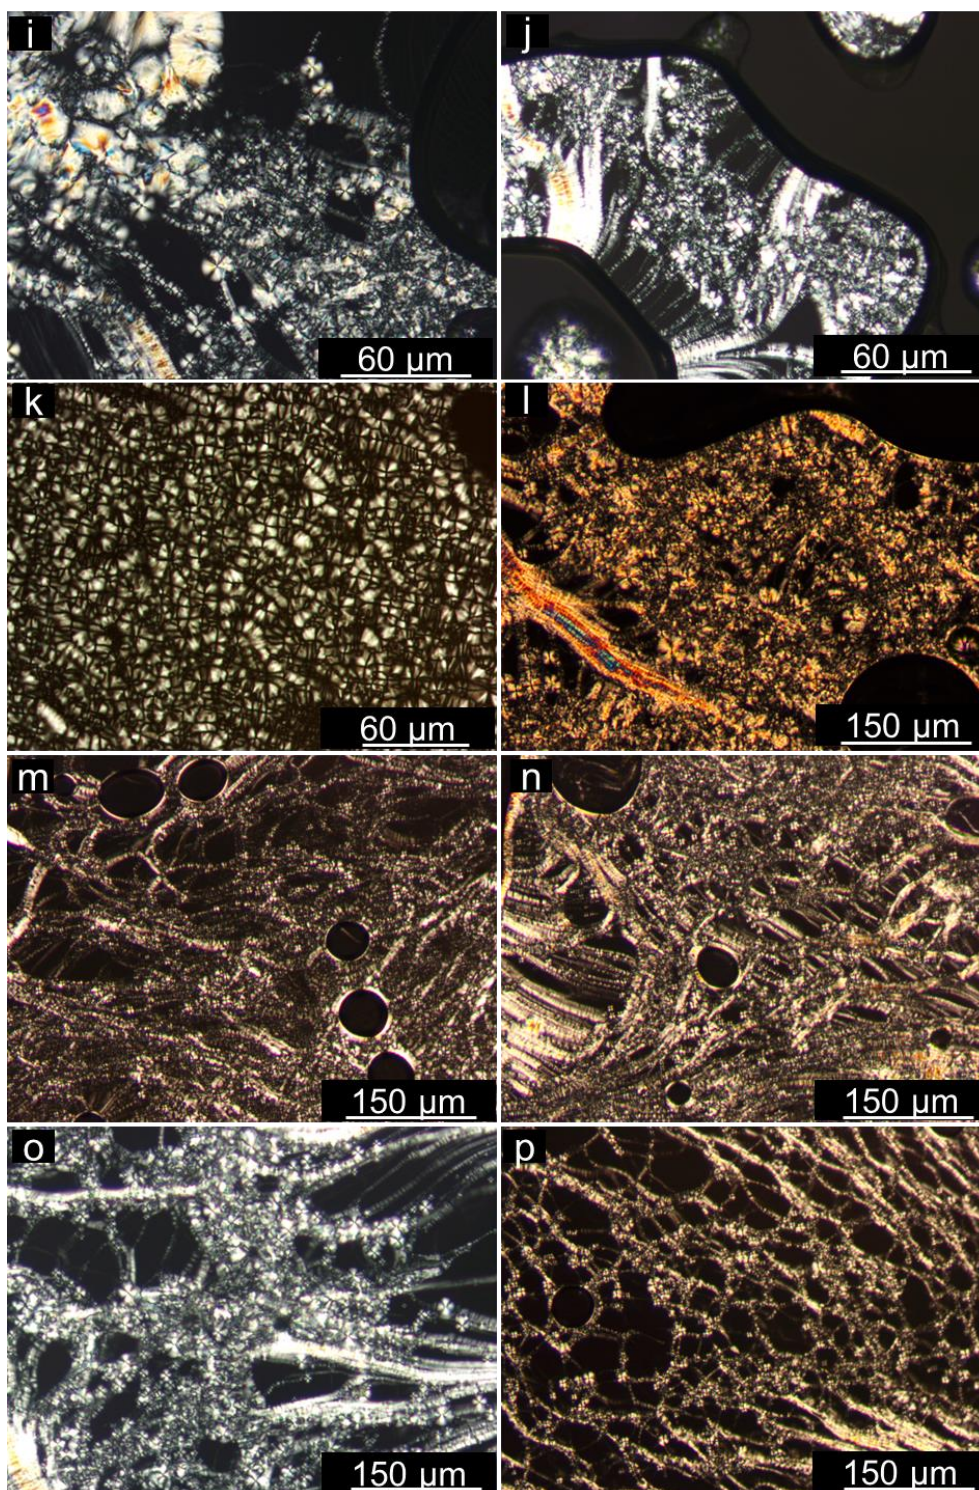

**Figure S12:** POM textures as seen between crossed polarizers upon cooling from the isotropic liquid (cooling rate 2K/min) of imidazolium carboxylates  $[\text{C}_n\text{mim}][\text{C}_m\text{-1COO}]$ . i)  $[\text{C}_{10}\text{mim}][\text{C}_{13}\text{COO}]$  temp. 110 °C, magnification 200x, j)  $[\text{C}_{12}\text{mim}][\text{C}_{13}\text{COO}]$  temp. 100 °C, magnification 200x, k)  $[\text{C}_{14}\text{mim}][\text{C}_{13}\text{COO}]$  temp. 84 °C, magnification 200x, l)  $[\text{C}_{16}\text{mim}][\text{C}_{13}\text{COO}]$  temp. 90 °C, magnification 100x, m)  $[\text{C}_{10}\text{mim}][\text{C}_{15}\text{COO}]$  temp. 80 °C, magnification 100x, n)  $[\text{C}_{12}\text{mim}][\text{C}_{15}\text{COO}]$  temp. 90 °C, magnification 100x, o)  $[\text{C}_{14}\text{mim}][\text{C}_{15}\text{COO}]$  temp. 110 °C, magnification 100x, p)  $[\text{C}_{16}\text{mim}][\text{C}_{15}\text{COO}]$  temp. 90 °C, magnification 100x.

## 6. Thermogravimetric analysis

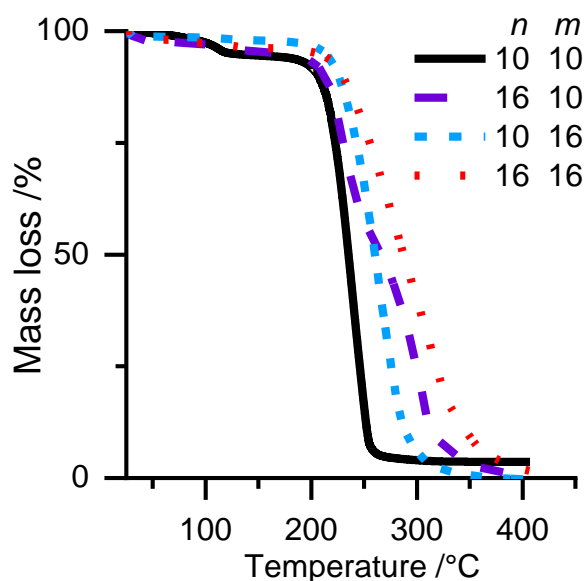

**Figure S13:** TGA diagram of exemplaric samples [C<sub>10</sub>mim][C<sub>9</sub>COO], [C<sub>16</sub>mim][C<sub>9</sub>COO], [C<sub>10</sub>mim][C<sub>15</sub>COO] and [C<sub>16</sub>mim][C<sub>15</sub>COO]. The measurements were performed from 25 to 450 °C with a constant heating rate of 10 K/min.

## 7. Surface tension measurements

For the determination of the minimum headgroup area  $a_{\min}$  of the salt-free new catanionic [C<sub>n</sub>mim][C<sub>m-1</sub>COO]'s the surface tension data were analyzed with the Gibbs adsorption isotherm (eq. 1, see manuscript) using a prefactor of  $\nu = 2$ . In more detail, the decrease of the surface tension data was described with a polynomial (quadratic) fit<sup>5</sup> to determine the surface excess concentration  $\Gamma$  and the head group area  $a$  as a function of the [C<sub>n</sub>mim][C<sub>m-1</sub>COO] concentration according to eqs. 1 and 2 (see manuscript), respectively. Figure S14 a) shows, by means of [C<sub>10</sub>mim][C<sub>9</sub>COO], that  $\Gamma$  systematically increases with increasing concentration of the [C<sub>10</sub>mim][C<sub>9</sub>COO]'s, while the head group area  $a$  systematically decreases (b)). As can be seen, the values of the maximum surface excess concentration  $\Gamma_{\max}$  and the minimum headgroup area  $a_{\min}$  can be determined nicely from these plots by extrapolation to the critical micelle concentration (indicated by the stars).

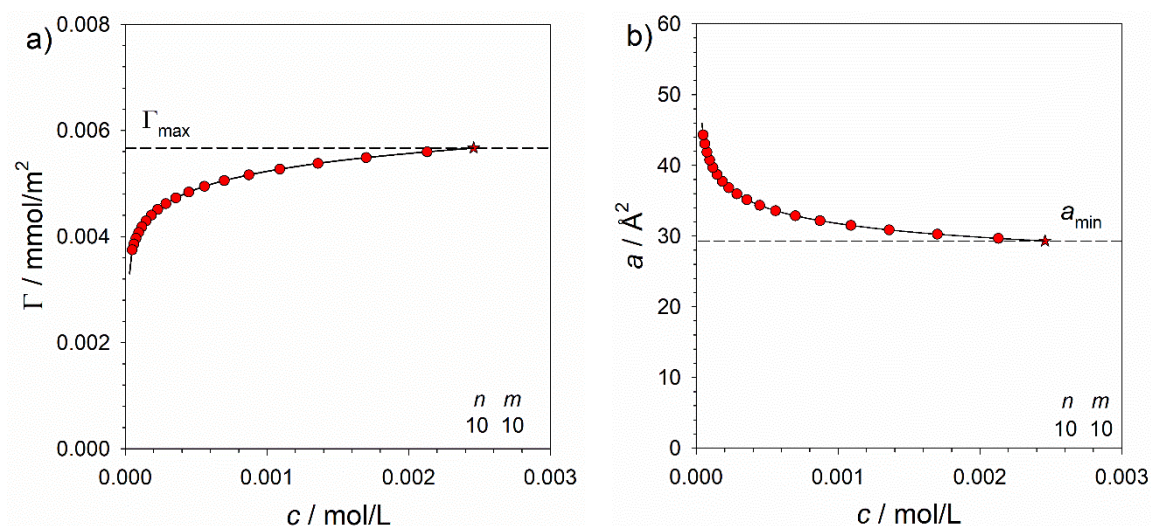

**Figure S14:** a) Surface excess concentration  $\Gamma$  and b) head group area  $a$  as a function of the  $[\text{C}_{10}\text{mim}][\text{C}_9\text{COO}]$  concentration determined from the analysis of the surface tension data ( $T=25\text{ }^\circ\text{C}$ ) according to eqs. 1 and 2, respectively.  $\Gamma_{\text{max}}$  and  $a_{\text{min}}$  were determined by extrapolation to the critical micelle concentration (indicated by the stars).

The cmc values obtained from the intersection of the quadratic fit describing the decrease of the surface tension data<sup>5</sup> and a linear extrapolation of the plateau data are compiled in the Table S3.

**Table S3:** Critical micelle concentration cmc, minimum surface tension  $\gamma_{\text{min}}$  and minimum head group area  $a_{\text{min}}$  for various salt-free imidazolium carboxylates  $[\text{C}_n\text{mim}][\text{C}_{m-1}\text{COO}]$  at  $T=25\text{ }^\circ\text{C}$ .

| $n$ | $m$ | cmc / mol/L             | $\gamma_{\text{min}} / \text{mN/m}$ | $a / \text{\AA}^2$ |
|-----|-----|-------------------------|-------------------------------------|--------------------|
| 10  | 10  | $(1.2 \pm 0.1) 10^{-3}$ | $23.1 \pm 0.3$                      | $58.6 \pm 4.1$     |
| 10  | 12  | $(1.6 \pm 0.2) 10^{-4}$ | $22.5 \pm 0.2$                      | $66.6 \pm 10.1$    |
| 10  | 14  | $(3.4 \pm 0.4) 10^{-5}$ | $21.2 \pm 0.3$                      | $51.2 \pm 12.4$    |
| 12  | 10  | $(3.9 \pm 0.2) 10^{-4}$ | $23.2 \pm 0.3$                      | $60.7 \pm 3.2$     |
| 14  | 10  | $(1.3 \pm 0.2) 10^{-4}$ | $23.9 \pm 0.2$                      | $55.0 \pm 4.3$     |
| 16  | 10  | $(4.1 \pm 0.5) 10^{-5}$ | $25.4 \pm 0.3$                      | $53.5 \pm 4.5$     |

## 8. X-Ray data

**Table S4:** XRD-data of imidazolium carboxylates  $[\mathbf{C}_n\mathbf{mim}][\mathbf{C}_{m-1}\mathbf{COO}]$ . Difference between experimental and calculated layer thickness  $d$  is caused by interdigitation.

| $n$ | $m$ | Mesophase | Layer thickness $d/\text{\AA}$ exp. (calcd.) | Miller indices |
|-----|-----|-----------|----------------------------------------------|----------------|
| 10  | 10  | SmA       | 26.5 (29.1)                                  | (001)          |
| 12  | 10  | SmA       | 28.4 (30.7)                                  | (001)          |
| 14  | 10  | SmA       | 28.5 (34.0)                                  | (001)          |
| 16  | 10  | SmA       | 29.2 (36.4)                                  | (001)          |
| 10  | 12  | SmA       | 27.4 (32.1)                                  | (001)          |
| 12  | 12  | SmA       | 28.4 (33.7)                                  | (001)          |
| 14  | 12  | SmA       | 29.7 (37.0)                                  | (001)          |
| 16  | 12  | SmA       | 34.5 (39.4)                                  | (001)          |
| 10  | 14  | SmA       | 30.2 (34.0)                                  | (001)          |
| 12  | 14  | SmA       | 29.9 (35.6)                                  | (001)          |
| 14  | 14  | SmA       | 32.1 (38.9)                                  | (001)          |
| 16  | 14  | SmA       | 32.9 (41.3)                                  | (001)          |
| 10  | 16  | SmA       | 29.8 (37.4)                                  | (001)          |
| 12  | 16  | SmA       | 34.3 (39.0)                                  | (001)          |
| 14  | 16  | SmA       | 35.9 (42.3)                                  | (001)          |
| 16  | 16  | SmA       | 37.8 (44.7)                                  | (001)          |

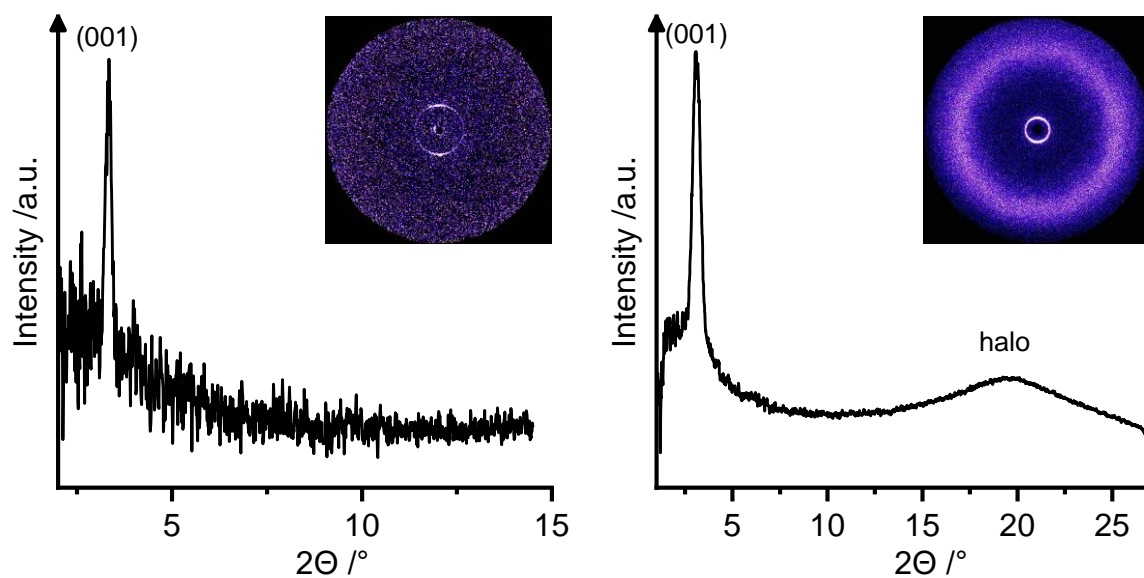

**Figure S15:** X-Ray scattering profile of  $[C_{10}mim][C_9COO]$  and corresponding diffraction pattern (SAXS (left); WAXS (right)) at  $78\text{ }^{\circ}C$ .

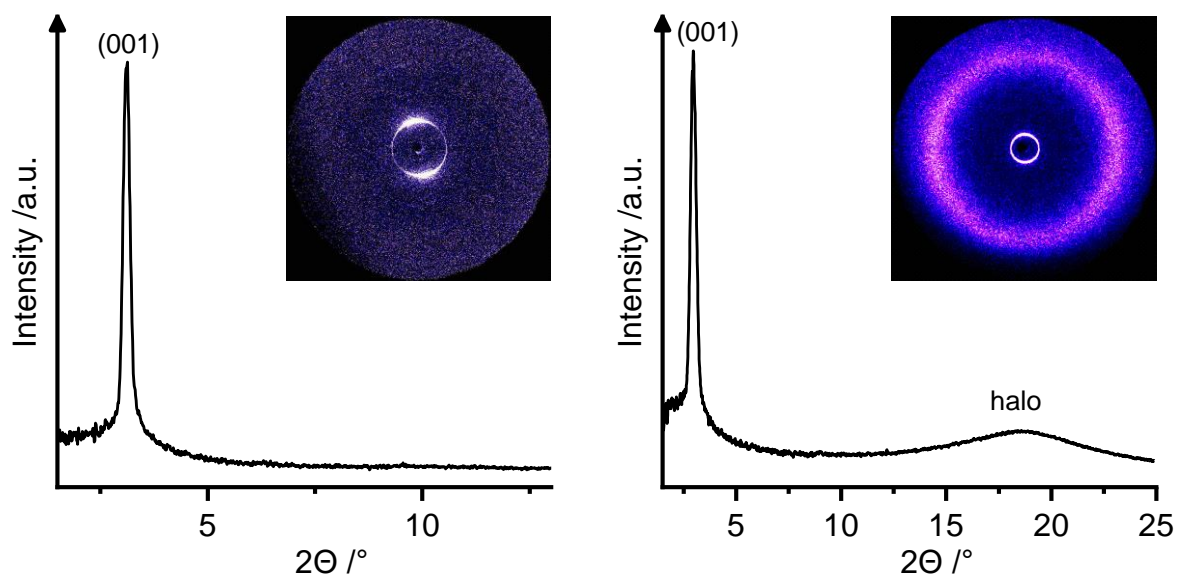

**Figure S16:** X-Ray scattering profile of  $[C_{12}mim][C_9COO]$  and corresponding diffraction pattern (SAXS (left); WAXS (right)) at  $87\text{ }^{\circ}C$ .

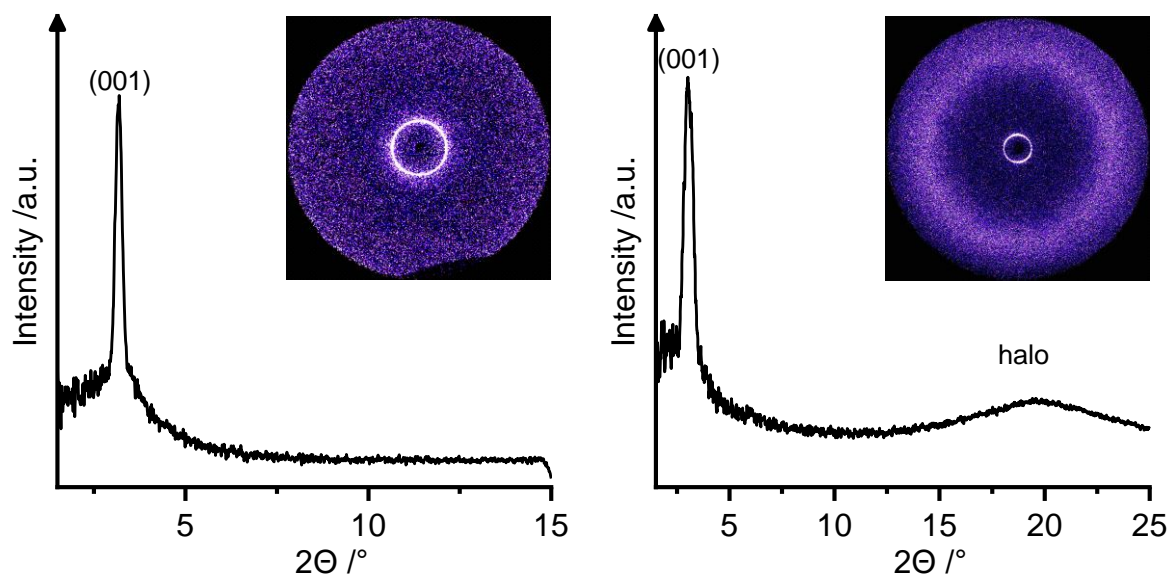

**Figure S17:** X-Ray scattering profile of  $[C_{14}mim][C_9COO]$  and corresponding diffraction pattern (SAXS (left); WAXS (right)) at  $90\text{ }^{\circ}\text{C}$ .

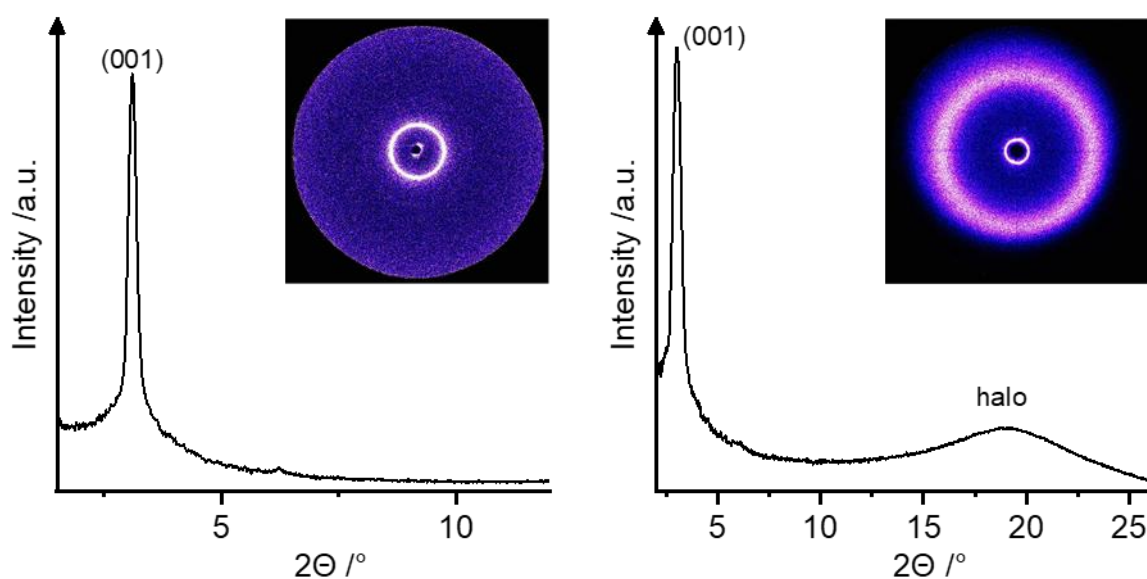

**Figure S18:** X-Ray scattering profile of  $[C_{16}mim][C_9COO]$  and corresponding diffraction pattern (SAXS (left); WAXS (right)) at  $100\text{ }^{\circ}\text{C}$ .

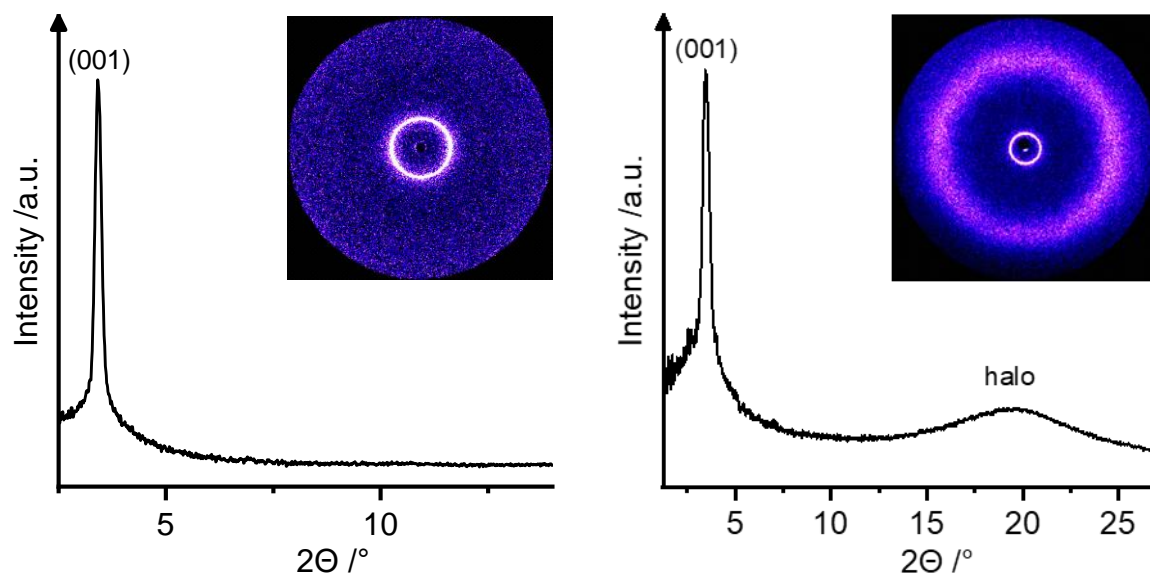

**Figure S19:** X-Ray scattering profile of  $[C_{10}mim][C_{11}COO]$  and corresponding diffraction pattern (SAXS (left) at 118 °C; WAXS (right)) at 128 °C.

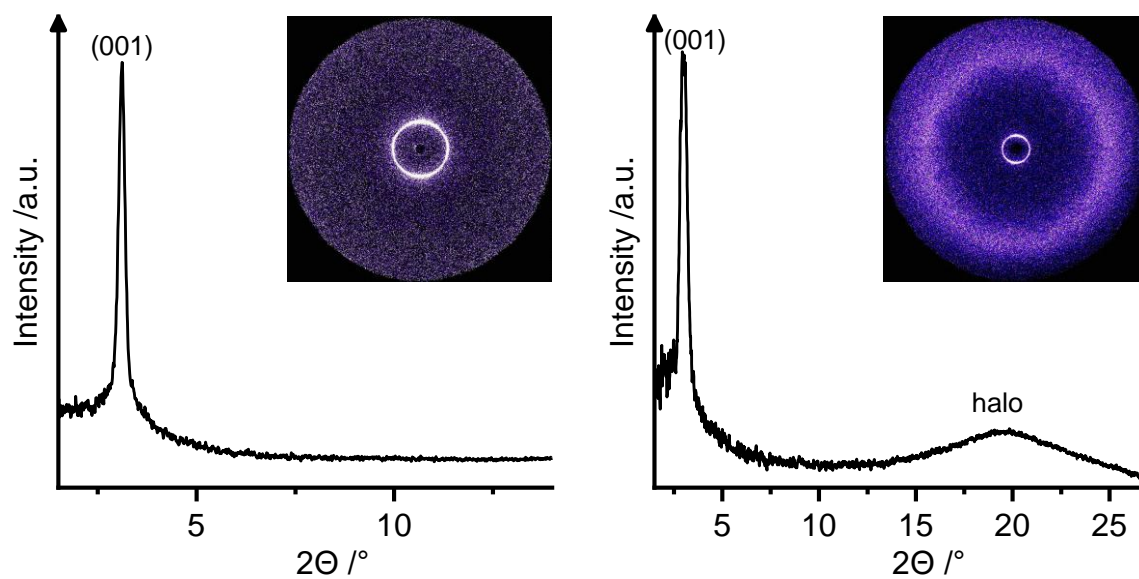

**Figure S20:** X-Ray scattering profile of  $[C_{12}mim][C_{11}COO]$  and corresponding diffraction pattern (SAXS (left); WAXS (right)) at 87 °C.

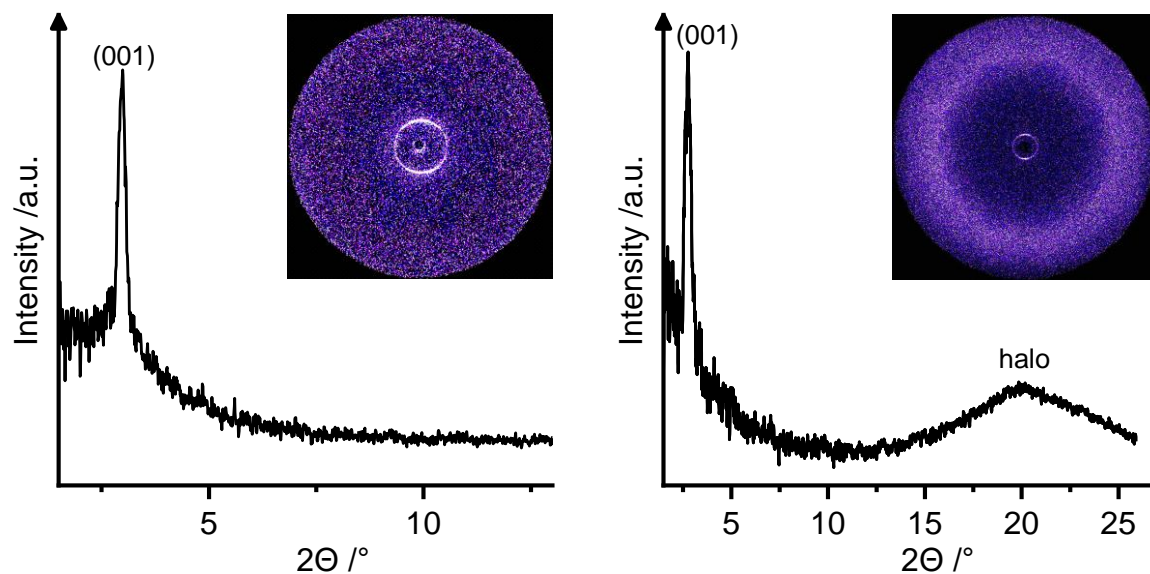

**Figure S21:** X-Ray scattering profile of  $[C_{14}mim][C_{11}COO]$  and corresponding diffraction pattern (SAXS (left); WAXS (right)) at  $97\text{ }^{\circ}\text{C}$ .

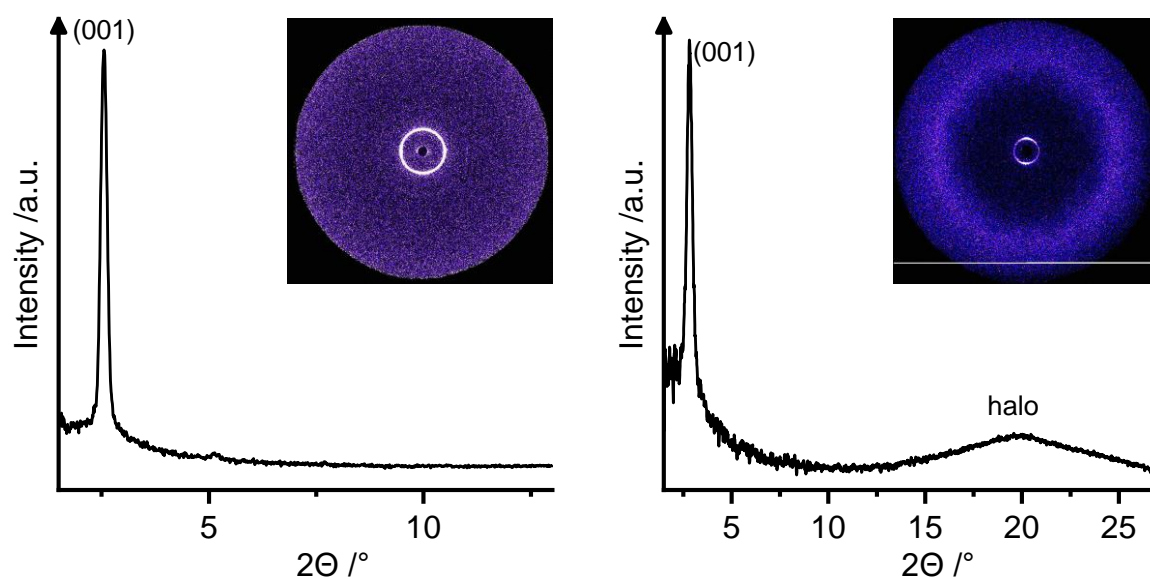

**Figure S22:** X-Ray scattering profile of  $[C_{16}mim][C_{11}COO]$  and corresponding diffraction pattern (SAXS (left); WAXS (right)) at  $75\text{ }^{\circ}\text{C}$ .

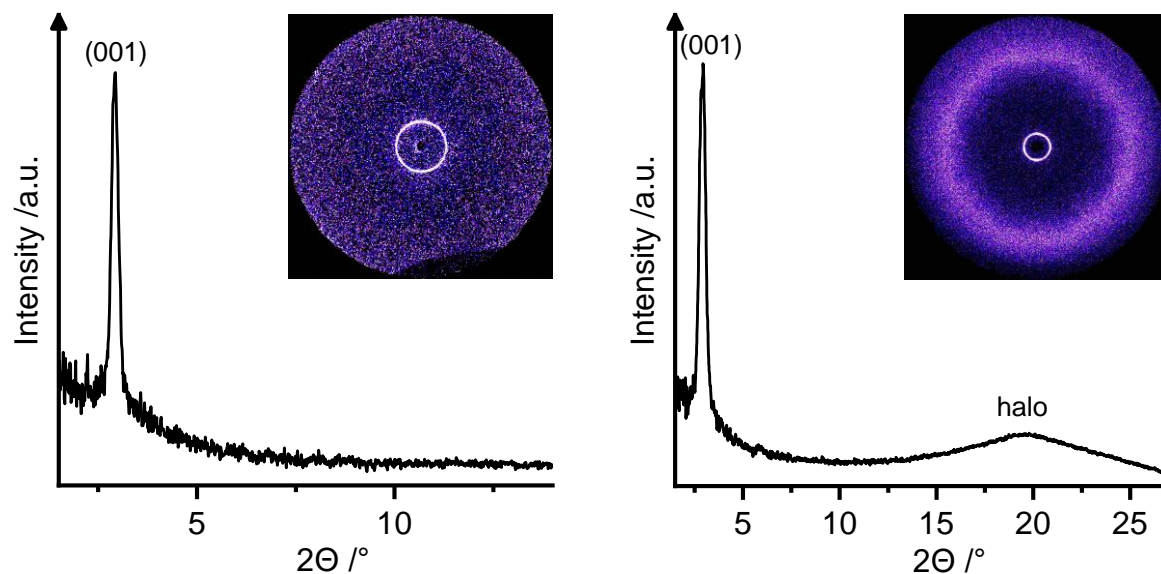

**Figure S23:** X-Ray scattering profile of  $[C_{10}mim][C_{13}COO]$  and corresponding diffraction pattern (SAXS (left); WAXS (right)) at  $76\text{ }^{\circ}C$ .

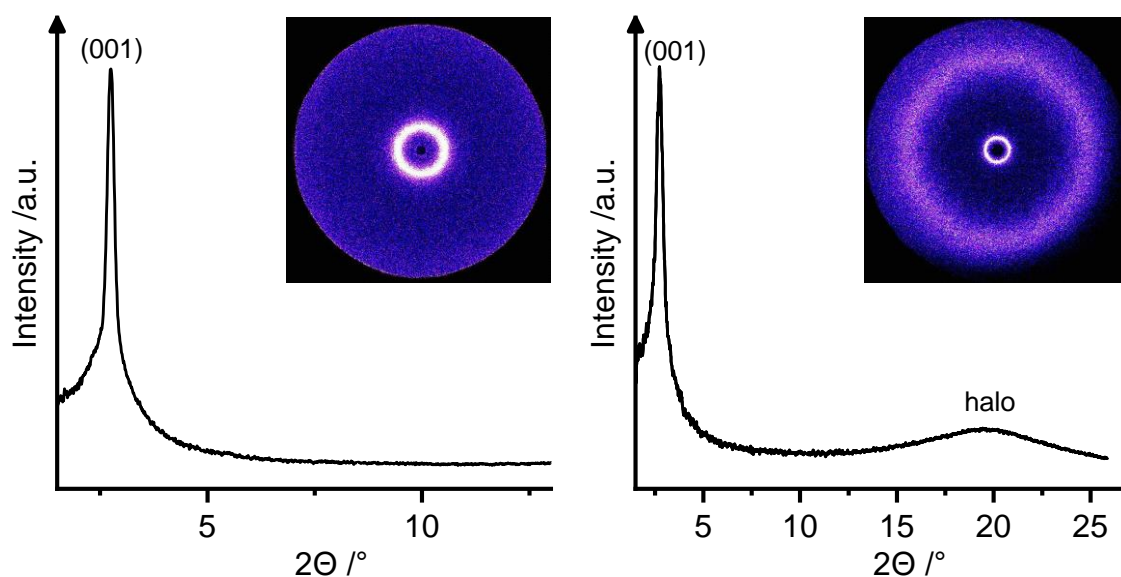

**Figure S24:** X-Ray scattering profile of  $[C_{12}mim][C_{13}COO]$  and corresponding diffraction pattern (SAXS (left); WAXS (right)) at  $83\text{ }^{\circ}C$ .

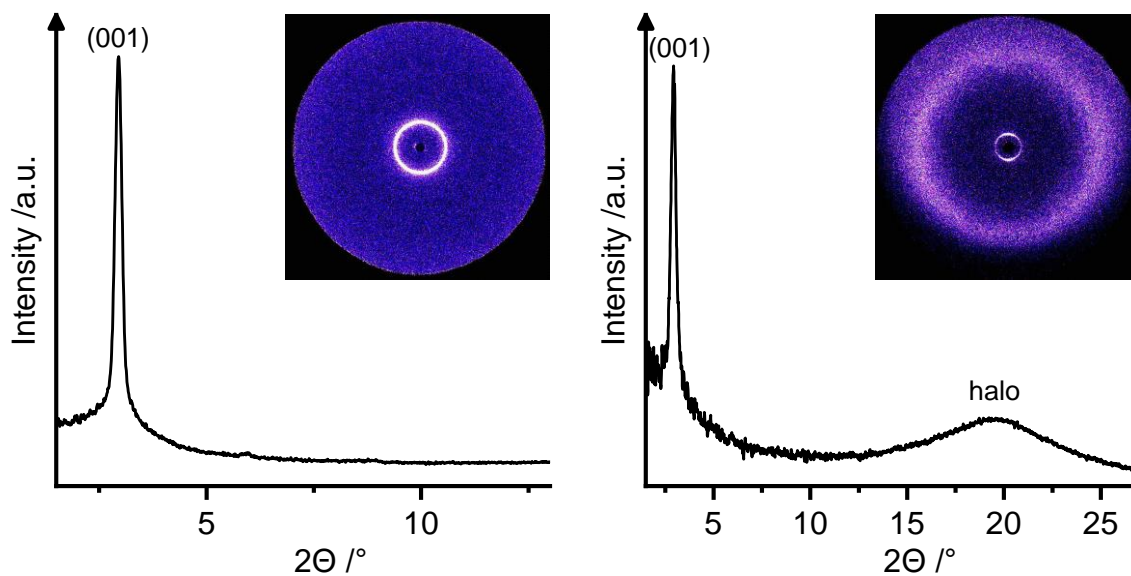

**Figure S25:** X-Ray scattering profile of  $[C_{14}mim][C_{13}COO]$  and corresponding diffraction pattern (SAXS (left); WAXS (right)) at  $74\text{ }^{\circ}C$ .

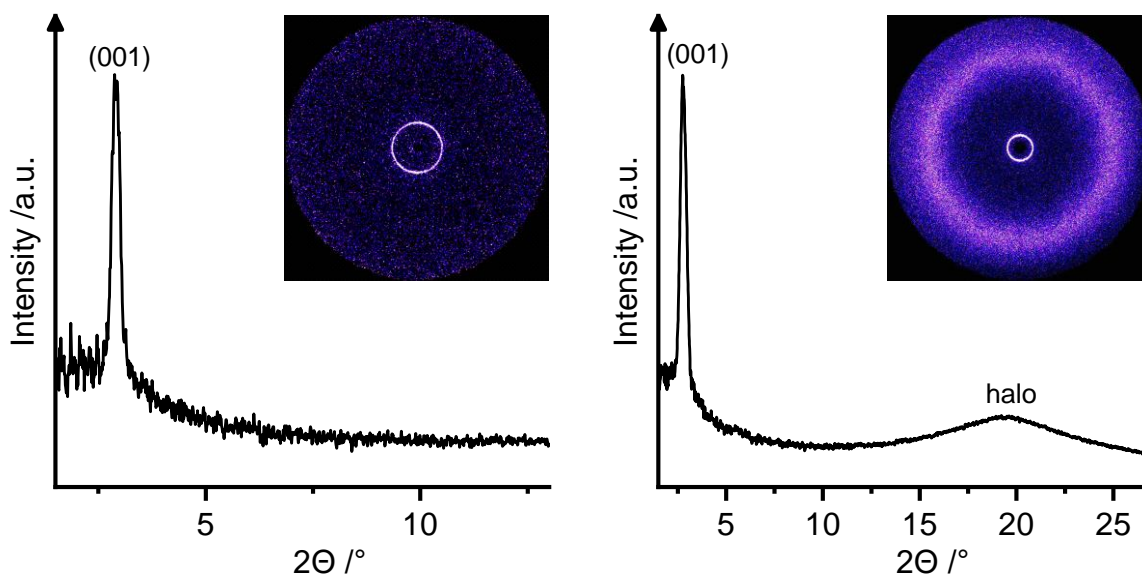

**Figure S26:** X-Ray scattering profile of  $[C_{16}mim][C_{13}COO]$  and corresponding diffraction pattern (SAXS (left); WAXS (right)) at  $95\text{ }^{\circ}C$ .

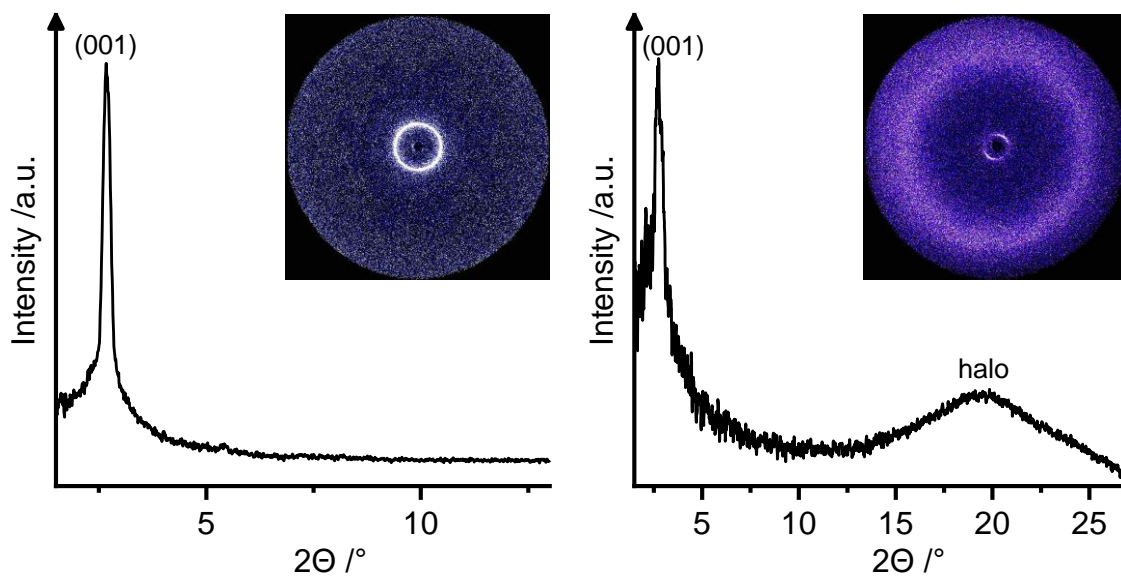

**Figure S27:** X-Ray scattering profile of  $[C_{10}mim][C_{15}COO]$  and corresponding diffraction pattern (SAXS (left); WAXS (right)) at  $78\text{ }^{\circ}C$ .

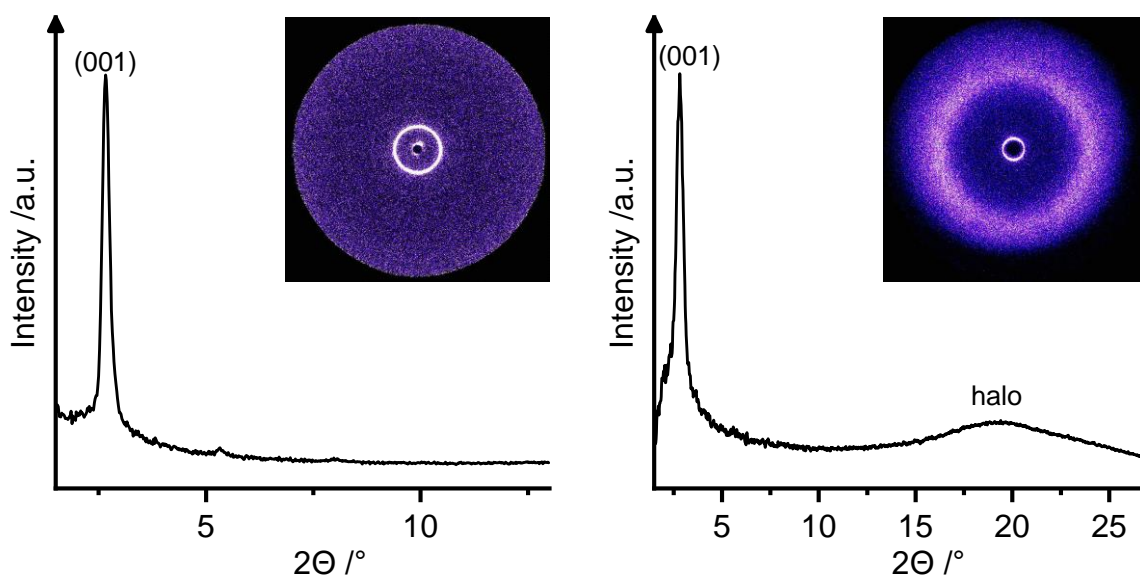

**Figure S28:** X-Ray scattering profile of  $[C_{12}mim][C_{15}COO]$  and corresponding diffraction pattern (SAXS (left); WAXS (right)) at  $87\text{ }^{\circ}C$ .

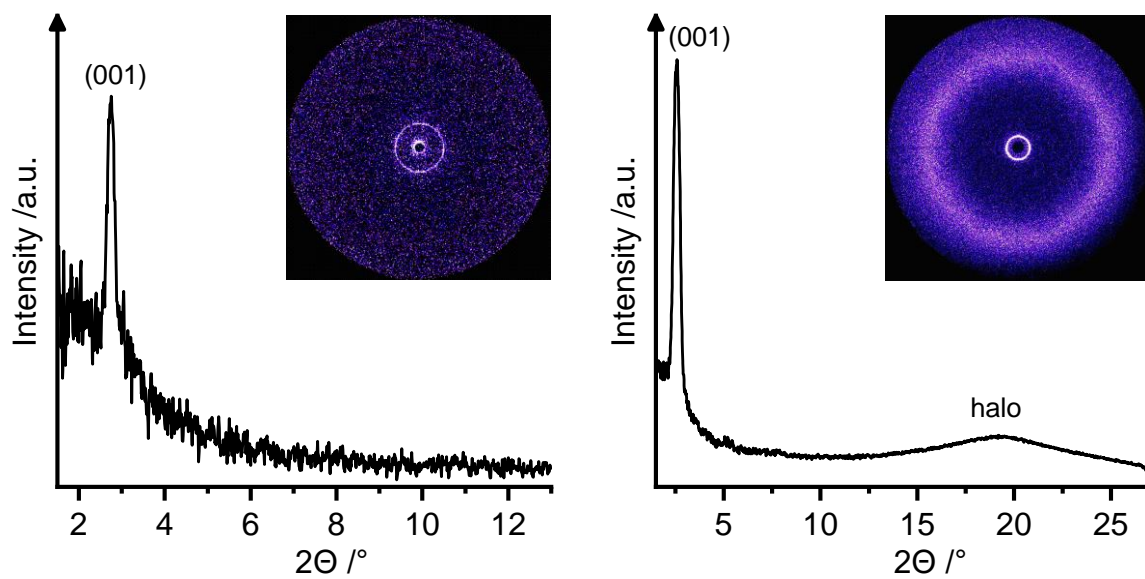

**Figure S29:** X-Ray scattering profile of  $[C_{14}mim][C_{15}COO]$  and corresponding diffraction pattern (SAXS (left); WAXS (right)) at  $92\text{ }^{\circ}C$ .

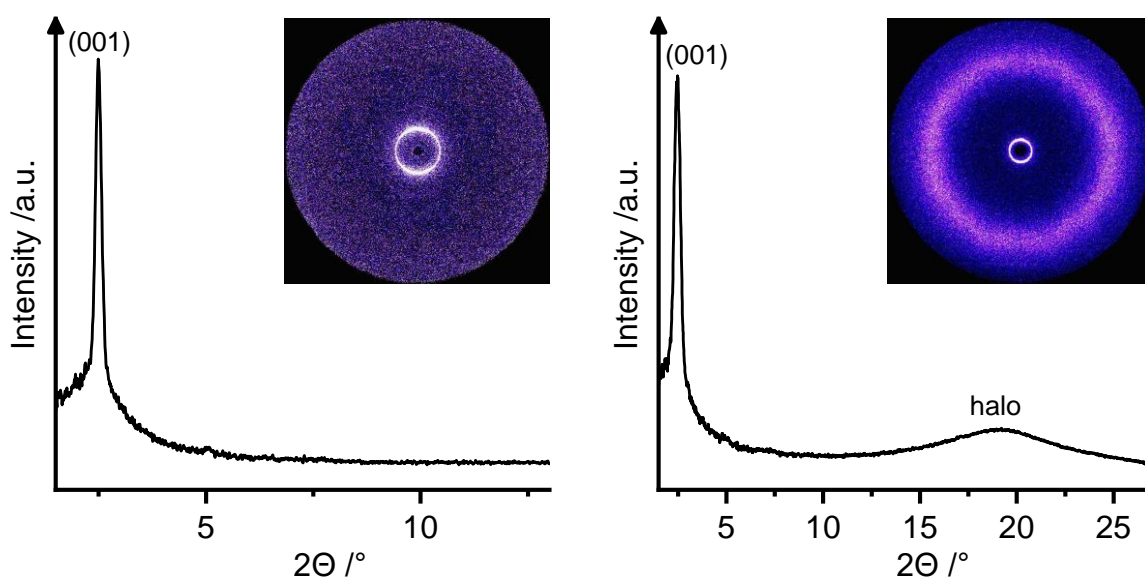

**Figure S30:** X-Ray scattering profile of  $[C_{16}mim][C_{15}COO]$  and corresponding diffraction pattern (SAXS (left); WAXS (right)) at  $97\text{ }^{\circ}C$ .

## 9. References

- 1 E. Alcalde, I. Dinarès, A. Ibáñez and N. Mesquida, *Chem. Commun.*, 2011, **47**, 3266.
- 2 A. Pal and S. Yadav, *J. Mol. Liq.*, 2017, **229**, 309–318.
- 3 H. Kumar and P. Sharma, *J. Mol. Liq.*, 2021, **322**, 114851.
- 4 A. A. Salman, M. Tabandeh, T. Heidelberg, R. S. D. Hussien, H. M. Ali, *Carbohydr. Res.*, 2015, **412**, 28–33.
- 5 E. A. Simister, R. K. Thomas, J. Penfold, R. Aveyard, B. P. Binks, P. Cooper, P. D. I. Fletcher, J. R. Lu, and A. Sokolowski, *J. Phys. Chem.*, 1992, **96**, 1383–1388.
